# Supplementary material for: Comparative Genome Sequence Analyses of Geographic Samples of Aspergillus fumigatus—Relevance for Amphotericin B Resistance
Source: Microorganisms. 2020 Oct 28;8(11):1673. doi: 10.3390/microorganisms8111673 (PMC7713013; doi:10.3390/microorganisms8111673)
Supplement: Supplementary file 1 [file microorganisms-08-01673-s001.xlsx]

## Sheet: Table S1
Alias	Run	BioSample	Experiment	Accession	Project	Collection Date	Country	Type	AMB MIC (mg/L)	Additional Information Source
Afs35	DRR146814	SAMD00133782	DRX137606	DRS075098	PRJDB7240	Unknown	Unknown	Clinical	1	DOI:10.1371/journal.ppat.1006096 DOI: 10.1128/AAC.00894-18
B5233	ERR2863830	SAMEA5055963	ERX2870068	ERS2867139	PRJEB28819	1985	United States	Clinical	0.5	DOI: 10.3389/fmicb.2019.01970 DOI: 10.3201/eid1508.090251 DOI: 10.3389/fmicb.2019.01970
P1MR	ERR2864483	SAMEA5057480	ERX2870721	ERS2868654		2016	Netherlands	Clinical	Unknown
P1MS	ERR2864484	SAMEA5057481	ERX2870722	ERS2868655		2016	Netherlands	Clinical	Unknown
P2CS	ERR2864485	SAMEA5057488	ERX2870723	ERS2868662		2018	Netherlands	Clinical	Unknown
Af65	ERR769499	SAMEA3267227	ERX712782	ERS663171	PRJEB8623	1997	United Kingdom, Manchester, England	Clinical	0.5	DOI: 10.1128/mBio.00536-15 DOI: 10.25560/70710
12-7505446	ERR769500	SAMEA3267220	ERX712783	ERS663164		2012	United Kingdom, Leeds	Clinical	0.25
12-7505220	ERR769501	SAMEA3267221	ERX712784	ERS663165		2012	United Kingdom, Leeds	Clinical	0.5
09-7500806	ERR769502	SAMEA3267222	ERX712785	ERS663166		2009	United Kingdom, Leeds	Clinical	0.5
12-7504652	ERR769503	SAMEA3267223	ERX712786	ERS663167		2012	United Kingdom, Leeds	Clinical	0.25
12-7504462	ERR769504	SAMEA3267224	ERX712787	ERS663168		2012	United Kingdom, Leeds	Clinical	0.5
12-7505054	ERR769505	SAMEA3267225	ERX712788	ERS663169		2012	United Kingdom, Leeds	Clinical	0.5
08-12-12-13	ERR769506	SAMEA3267228	ERX712789	ERS663172		2003	Netherlands, Nijmegen	Clinical	0.25
08-36-03-25	ERR769507	SAMEA3267229	ERX712790	ERS663173		2005	Netherlands, Nijmegen	Clinical	0.5
08-31-08-91	ERR769508	SAMEA3267230	ERX712791	ERS663174		2004	Netherlands, Nijmegen	Clinical	0.5
08-19-02-61	ERR769509	SAMEA3267231	ERX712792	ERS663175		2008	Netherlands, Nijmegen	Environmental	0.25
08-19-02-30	ERR769510	SAMEA3267232	ERX712793	ERS663176		2008	Netherlands, Nijmegen	Environmental	0.5
10-01-02-27	ERR769511	SAMEA3267233	ERX712794	ERS663177		2010	Netherlands, Nijmegen	Clinical	0.5
08-19-02-46	ERR769512	SAMEA3267234	ERX712795	ERS663178		2008	Netherlands, Nijmegen	Environmental	0.5
08-19-02-10	ERR769513	SAMEA3267235	ERX712796	ERS663179		2008	Netherlands, Nijmegen	Environmental	0.25
Afu 942/09	ERR769514	SAMEA3267236	ERX712797	ERS663180		2009	India, Delhi	Clinical	0.25
Afu 1042/09	ERR769515	SAMEA3267237	ERX712798	ERS663181		2009	India, Delhi	Clinical	0.25
Afu 343/P/11	ERR769516	SAMEA3267238	ERX712799	ERS663182		2011	India, Delhi	Clinical	0.125
Afu 591/12	ERR769517	SAMEA3267239	ERX712800	ERS663183		2012	India, Delhi	Clinical	0.5
Afu 124/E11	ERR769518	SAMEA3267240	ERX712801	ERS663184		2011	India, Delhi	Environmental	0.125
Afu 166/E11	ERR769519	SAMEA3267241	ERX712802	ERS663185		2011	India, Delhi	Environmental	Unknown
Afu 257/E11	ERR769520	SAMEA3267242	ERX712803	ERS663186		2011	India, Delhi	Environmental	0.125
Afu 218/E11	ERR769521	SAMEA3267243	ERX712804	ERS663187		2011	India, Delhi	Environmental	0.125
CM3262	SRR7418922	SAMN09470292	SRX4289906	SRS3453382	PRJNA477519	2005	Spain, Madrid	Clinical	0.125 to 0.25	DOI: 10.3390/genes9070363 DOI: 10.1128/AAC.00241-18
CM2733	SRR7418923	SAMN09470293	SRX4289905	SRS3453380		2004	Spain, Madrid	Clinical	0.125 to 0.25
CM2730	SRR7418924	SAMN09470294	SRX4289904	SRS3453381		2004	Spain, Madrid	Clinical	0.125 to 0.25
CM7560	SRR7418925	SAMN09470295	SRX4289903	SRS3453379		2014	Spain, Madrid	Clinical	0.125 to 0.25
CM3249	SRR7418926	SAMN09470288	SRX4289902	SRS3453378		2005	Spain, Madrid	Clinical	0.125 to 0.25
CM3720	SRR7418927	SAMN09470289	SRX4289901	SRS3453377		2005	Spain, Madrid	Clinical	Unknown
CM4602	SRR7418928	SAMN09470290	SRX4289900	SRS3453376		2006	Spain, Madrid	Clinical	0.125 to 0.25
CM3249b	SRR7418929	SAMN09470291	SRX4289899	SRS3453375		2005	Spain, Madrid	Clinical	Unknown
CM2495	SRR7418930	SAMN09470296	SRX4289898	SRS3453373		2002	Spain, Madrid	Clinical	0.125 to 0.25
akuBKU80	SRR7418932	SAMN09470313	SRX4289896	SRS3453372		2003	Spain, Madrid	Clinical	0.125 to 0.25
CM7570	SRR7418933	SAMN09470312	SRX4289895	SRS3453371		2014	Spain, Madrid	Clinical	0.125 to 0.25
A1163	SRR7418934	SAMN09470315	SRX4289894	SRS3453370		2008	Spain, Madrid	Clinical	Unknown
ATCC 46645	SRR7418935	SAMN09470314	SRX4289893	SRS3453369		2008	Spain, Madrid	Clinical	Unknown
CM6458	SRR7418936	SAMN09470309	SRX4289892	SRS3453368		2011	Spain, Madrid	Clinical	Unknown
CM6126	SRR7418937	SAMN09470308	SRX4289891	SRS3453367		2010	Spain, Madrid	Clinical	Unknown
CM7555	SRR7418938	SAMN09470311	SRX4289890	SRS3453366		2014	Spain, Madrid	Clinical	Unknown
CM7510	SRR7418939	SAMN09470310	SRX4289889	SRS3453365		2014	Spain, Madrid	Clinical	Unknown
TP12	SRR7418940	SAMN09470298	SRX4289888	SRS3453364		2001	Spain, Madrid	Clinical	0.125 to 0.25
CM7632	SRR7418941	SAMN09470299	SRX4289887	SRS3453363		2015	Spain, Madrid	Clinical	0.125 to 0.25
CM237	SRR7418942	SAMN09470300	SRX4289886	SRS3453362		1996	Spain, Madrid	Clinical	Unknown
ATCC 204305	SRR7418943	SAMN09470301	SRX4289885	SRS3453361		1995	Spain, Madrid	Clinical	Unknown
CM5419	SRR7418944	SAMN09470302	SRX4289884	SRS3453360		2008	Spain, Madrid	Clinical	Unknown
CM3248	SRR7418945	SAMN09470303	SRX4289883	SRS3453359		2005	Spain, Madrid	Clinical	Unknown
TP32	SRR7418946	SAMN09470304	SRX4289882	SRS3453358		2010	Spain, Madrid	Clinical	0.125 to 0.25
CM2141	SRR7418947	SAMN09470305	SRX4289881	SRS3453356		1998	Spain, Madrid	Clinical	Unknown
CM4946	SRR7418948	SAMN09470306	SRX4289880	SRS3453357		2007	Spain, Madrid	Clinical	0.125 to 0.25
CM5757	SRR7418949	SAMN09470307	SRX4289879	SRS3453355		2009	Spain, Madrid	Clinical	Unknown
Af-M1509-D	SRR6434917	SAMN08235362	SRX3526480	SRS2802204	PRJNA427336	2004	United States, North Carolina	Clinical	Unknown	DOI: 10.1111/tid.12935
M5960-D	SRR6434918	SAMN08235363	SRX3526479	SRS2802202		2014	United States, North Carolina	Clinical	Unknown
MO68507EXP	SRR5676586	SAMN07222744	SRX2912094	SRS2278381	PRJNA390160	2012	Portugal, Porto	Clinical	Unknown	DOI: 10.1101/149856.
MO54056EXP	SRR5676587	SAMN07222736	SRX2912093	SRS2278380		2011	Portugal, Porto	Clinical	Unknown
MO76959EXP	SRR5676588	SAMN07222746	SRX2912092	SRS2278379		2013	Portugal, Porto	Clinical	Unknown
MO69250EXP	SRR5676589	SAMN07222745	SRX2912091	SRS2278378		2013	Portugal, Porto	Clinical	Unknown
MO79587EXP	SRR5676590	SAMN07222748	SRX2912090	SRS2278377		2013	Portugal, Porto	Clinical	Unknown
MO78722EXP	SRR5676591	SAMN07222747	SRX2912089	SRS2278375		2013	Portugal, Porto	Clinical	Unknown
MO91298SB	SRR5676592	SAMN07222750	SRX2912088	SRS2278376		2014	Portugal, Porto	Clinical	Unknown
MO89263	SRR5676593	SAMN07222749	SRX2912087	SRS2278374		2014	Portugal, Porto	Clinical	Unknown
IFM 59355-1	DRR022916	SAMD00019242	DRX020976	DRS016460	PRJDB3064	2009	Japan, Chiba University Hospital	Clinical	2	DOI: 10.1128/JCM.01105-14
IFM 59355-2	DRR022917	SAMD00019243	DRX020977	DRS016461		2009	Japan, Chiba University Hospital	Clinical	2
IFM 59356-1	DRR022919	SAMD00019244	DRX020978	DRS016462		2009	Japan, Chiba University Hospital	Clinical	2
IFM 59356-2	DRR022922	SAMD00019245	DRX020979	DRS016463		2009	Japan, Chiba University Hospital	Clinical	1
IFM 59356-3	DRR022924	SAMD00019246	DRX020980	DRS016464		2009	Japan, Chiba University Hospital	Clinical	2
IFM 59361-1	DRR022925	SAMD00019247	DRX020981	DRS016465		2009	Japan, Chiba University Hospital	Clinical	1
IFM 59361-2	DRR022926	SAMD00019248	DRX020982	DRS016466		2009	Japan, Chiba University Hospital	Clinical	1
IFM 60237	DRR022927	SAMD00019249	DRX020983	DRS016467		2011	Japan, Chiba University Hospital	Clinical	2
IFM 55369	DRR015087	SAMD00013557	DRX013572	DRS013318	PRJDB1541	2009	Japan, Ishikawa	Clinical	Unknown	DOI: 10.1093/mmy/myv003 DOI: 10.3390/genes9070363 DOI: 10.1016/j.jiac.2016.12.004
IFM 59056	DRR015093	SAMD00013552	DRX013573	DRS013319		2009	Japan, Chiba	Clinical	Unknown
IFM 59359	DRR015096	SAMD00013546	DRX013574	DRS013320		2007	Japan, Chiba	Clinical	Unknown
IFM 59361	DRR015099	SAMD00013551	DRX013575	DRS013321		2009	Japan, Chiba	Clinical	Unknown
IFM 60514	DRR015102	SAMD00013544	DRX013576	DRS013322		2011	Japan, Chiba	Clinical	Unknown
IFM 59073	DRR015106	SAMD00013554	DRX013577	DRS013323		2009	Japan, Chiba	Clinical	Unknown
IFM 61407	DRR015109	SAMD00013549	DRX013578	DRS013324		2012	Japan, Chiba	Clinical	Unknown
IFM 61610	DRR015112	SAMD00013558	DRX013579	DRS013325		2012	Japan, Tokyo	Clinical	Unknown
IFM 58026	DRR017537	SAMD00013550	DRX015829	DRS015319		2009	Japan, Tottori	Clinical	Unknown
IFM 58029	DRR017540	SAMD00013545	DRX015830	DRS015320		2009	Japan, Nagasaki	Clinical	Unknown
IFM 58401	DRR017543	SAMD00013548	DRX015831	DRS015321		2009	Japan, Chiba	Clinical	Unknown
IFM 59365	DRR017546	SAMD00013555	DRX015832	DRS015322		2010	Japan, Chiba	Clinical	Unknown
IFM 59777	DRR017549	SAMD00013547	DRX015833	DRS015323		2010	Japan, Okayama	Clinical	Unknown
IFM 61118	DRR017552	SAMD00013543	DRX015834	DRS015324		2012	Japan, Chiba	Clinical	Unknown
IFM 61578	DRR017555	SAMD00013553	DRX015835	DRS015325		2012	Japan, Osaka	Clinical	Unknown
IFM 62115	DRR017558	SAMD00013556	DRX015836	DRS015326		2013	Japan, Aichi	Clinical	Unknown
IFM 62516	DRR017559	SAMD00013559	DRX015837	DRS015327		2014	Japan, Tokyo	Clinical	Unknown
CNM-CM8689	SRR10592629	SAMN13422810	SRX7272468	SRS5766627	PRJNA592352	Unknown	Spain, Madrid	Clinical	1	DOI: 10.3389/fgene.2020.00459
CNM-CM8686	SRR10592630	SAMN13422809	SRX7272467	SRS5766626		Unknown	Spain, Madrid	Clinical	0.5
CNM-CM8812	SRR10592631	SAMN13422808	SRX7272466	SRS5766625		Unknown	Spain, Madrid	Clinical	0.25
CNM-CM8714	SRR10592632	SAMN13422807	SRX7272465	SRS5766624		Unknown	Spain, Madrid	Clinical	0.25
CNM-CM8057	SRR10592633	SAMN13422806	SRX7272464	SRS5766623		Unknown	Spain, Madrid	Clinical	0.25
LMB-35Aa	SRR2954803	SAMN04219459	SRX1447294	SRS1175213	PRJNA298653	2005	Remote Tingo Maria forest, Huanuco, Peru	Environmental	Unknown	DOI: 10.1016/j.jbiotec.2017.04.010
ISSFT-021	SRR4002443	SAMN05511648	SRX2002697	SRS1602803	PRJNA319359	2015	International Space Station	Environmental	Unknown	DOI: 10.1128/mSphere.00227-16
IF1SW-F4	SRR4002444	SAMN05511649	SRX2002698	SRS1602804		2015	International Space Station	Environmental	Unknown
DI 15-111	SRR7841976	SAMN10068282	SRX4692791	SRS3786105	PRJNA491253	2013	United States	Clinical	Unknown	DOI: 10.1128/mBio.00437-19 DOI: http://dx.doi.org/10.21007/etd.cghs.2019.0487 DOI: 10.1128/JCM.02478-15
DI 15-110	SRR7841977	SAMN10068281	SRX4692790	SRS3786104		2013	United States, Connecticut	Clinical	Unknown
DI 15-102	SRR7841978	SAMN10068274	SRX4692789	SRS3786103		2010	United States, Pennsylvania	Clinical	Unknown
DI 15-100	SRR7841979	SAMN10068273	SRX4692788	SRS3786102		2008	United States	Clinical	Unknown
DI 15-105	SRR7841980	SAMN10068276	SRX4692787	SRS3786101		2012	United States	Clinical	0.125
DI 15-103	SRR7841981	SAMN10068275	SRX4692786	SRS3786100		2010	United States, Ohio	Clinical	Unknown
DI 15-107	SRR7841982	SAMN10068278	SRX4692785	SRS3786099		2012	United States, California	Clinical	Unknown
DI 15-106	SRR7841983	SAMN10068277	SRX4692784	SRS3786098		2012	United States	Clinical	Unknown
DI 15-109	SRR7841984	SAMN10068280	SRX4692783	SRS3786097		2012	United States, Washington	Clinical	Unknown
DI 15-108	SRR7841985	SAMN10068279	SRX4692782	SRS3786096		2012	United States, California	Clinical	Unknown
DI 15-99	SRR7841986	SAMN10068272	SRX4692781	SRS3786095		2008	United States, Maryland	Clinical	Unknown
DI 15-98	SRR7841987	SAMN10068271	SRX4692780	SRS3786094		2008	United States	Clinical	Unknown
DI 16-8	SRR7841988	SAMN10068266	SRX4692779	SRS3786093		Unknown	United States	Clinical	Unknown
DI 16-7	SRR7841989	SAMN10068265	SRX4692778	SRS3786092		Unknown	United States	Clinical	Unknown
DI 16-6	SRR7841990	SAMN10068264	SRX4692777	SRS3786091		Unknown	United States	Clinical	Unknown
DI 16-5	SRR7841991	SAMN10068263	SRX4692776	SRS3786090		Unknown	United States	Clinical	Unknown
DI 15-97	SRR7841992	SAMN10068270	SRX4692775	SRS3786089		2008	United States, North Carolina	Clinical	Unknown
DI 15-96	SRR7841993	SAMN10068269	SRX4692774	SRS3786087		2008	United States, Arizona	Clinical	Unknown
DI 15-95	SRR7841994	SAMN10068268	SRX4692773	SRS3786088		2007	United States, Connecticut	Clinical	Unknown
DI 16-9	SRR7841995	SAMN10068267	SRX4692772	SRS3786086		Unknown	United States	Clinical	Unknown
DI 15-118	SRR7841996	SAMN10068287	SRX4692771	SRS3786085		2014	United States	Clinical	Unknown
DI 15-120	SRR7841997	SAMN10068288	SRX4692770	SRS3786084		2015	United States, Ohio	Clinical	Unknown
DI 15-114	SRR7841998	SAMN10068283	SRX4692769	SRS3786083		2014	United States, California	Clinical	Unknown
DI 15-115	SRR7841999	SAMN10068284	SRX4692768	SRS3786082		2014	United States	Clinical	Unknown
DI 15-116	SRR7842000	SAMN10068285	SRX4692767	SRS3786080		2014	United States, Pennsylvania	Clinical	Unknown
DI 15-117	SRR7842001	SAMN10068286	SRX4692766	SRS3786081		2014	United States, Maryland	Clinical	Unknown
B5852	SRR343134	SAMN00717298	SRX097004	SRS260913	PRJNA67101	1998	United States, California	Clinical	Unknown	DOI 10.1016/j.cub.2005.05.045 DOI: 10.1093/jac/dkg384 DOI: 10.1128/AAC.41.6.1364 DOI: 10.1128/AAC.00517-11 DOI: 10.1128/JCM.41.9.4252-4258.2003 DOI: 10.1093/jac/40.3.401 DOI: 10.1016/0002-9343(89)90475-0 DOI: 10.1128/aac.46.2.556-557.2002 DOI: 10.1128/EC.00164-07 DOI:10.1128/AAC.00833-13 DOI:10.1371/journal.pone.0158724 DOI: 10.1101/2020.05.24.113787
B5854	SRR343135	SAMN00717299	SRX097005	SRS260914		1998	United States, California	Clinical	Unknown
B5856	SRR343136	SAMN00717300	SRX097006	SRS260915		1998	United States, California	Clinical	Unknown
B5859	SRR343137	SAMN00717301	SRX097007	SRS260916		1998	United States, California	Clinical	Unknown
B5863	SRR343138	SAMN00717302	SRX097008	SRS260917		1998	United States, California	Environmental	Unknown
B5866	SRR343139	SAMN00717303	SRX097009	SRS260918		1998	United States, California	Environmental	Unknown
B5868	SRR343140	SAMN00717304	SRX097010	SRS260919		1998	United States, California	Environmental	Unknown
B6069	SRR343141	SAMN00717305	SRX097011	SRS260920		2002	Canada	Clinical	Unknown
B6074	SRR343142	SAMN00717306	SRX097012	SRS260921		2002	Canada	Clinical	Unknown
B6078	SRR343143	SAMN00717307	SRX097013	SRS260922		2002	Canada	Environmental	Unknown
B6079	SRR343145	SAMN00717313	SRX097015	SRS260924		2002	Canada	Environmental	Unknown
B6081	SRR343146	SAMN00717314	SRX097016	SRS260925		2002	Canada	Environmental	Unknown
F11628	SRR343149	SAMN00717316	SRX097018	SRS260927		Unknown	United Kingdom	Clinical	0.06
F12865	SRR343150	SAMN00717317	SRX097019	SRS260928		Unknown	United Kingdom	Clinical	0.125
F15767	SRR343152	SAMN00717318	SRX097021	SRS260929		Unknown	United Kingdom	Clinical	Unknown
AF41	SRR617720	SAMN01815885	SRX204868	SRS375791		1988	United States	Clinical	Unknown
AF72	SRR617721	SAMN01815886	SRX204869	SRS375792		1989	United States	Clinical	0.25
AF90	SRR617722	SAMN01815887	SRX204870	SRS375793		1989	United States	Clinical	0.5
F12041	SRR617723	SAMN01815888	SRX204871	SRS375794		Unknown	United Kingdom	Clinical	0.25
F12219	SRR617724	SAMN01815889	SRX204872	SRS375795		Unknown	United Kingdom	Clinical	Unknown
F12636	SRR617725	SAMN01815890	SRX204873	SRS375796		Unknown	United Kingdom	Clinical	Unknown
F13535	SRR617726	SAMN01815891	SRX204874	SRS375797		Unknown	United Kingdom	Clinical	0.125
F13619	SRR617727	SAMN01815892	SRX204875	SRS375798		Unknown	United Kingdom	Clinical	Unknown
F13952	SRR617728	SAMN01815893	SRX204876	SRS375799		Unknown	United Kingdom	Clinical	Unknown
F14403	SRR617729	SAMN01815894	SRX204877	SRS375800		Unknown	United Kingdom	Clinical	Unknown
F14532	SRR617731	SAMN01815896	SRX204879	SRS375802		Unknown	United Kingdom	Clinical	Unknown
F15390	SRR617733	SAMN01815898	SRX204881	SRS375804		Unknown	United Kingdom	Clinical	Unknown
F15927	SRR617734	SAMN01815899	SRX204882	SRS375805		Unknown	Canada	Clinical	Unknown
F16134	SRR617735	SAMN01815900	SRX204883	SRS375806		Unknown	Canada	Clinical	Unknown
F16216	SRR617736	SAMN01815901	SRX204884	SRS375807		Unknown	United Kingdom	Clinical	Unknown
F16311	SRR617737	SAMN01815902	SRX204885	SRS375808		Unknown	United Kingdom	Clinical	Unknown
F17582	SRR617738	SAMN01815903	SRX204886	SRS375809		Unknown	United Kingdom	Clinical	Unknown
F17729	SRR617739	SAMN01815904	SRX204887	SRS375810		Unknown	United Kingdom	Clinical	Unknown
F18085	SRR617742	SAMN01815907	SRX204890	SRS375813		Unknown	United Kingdom	Clinical	Unknown
F7763	SRR617744	SAMN01815909	SRX204892	SRS375815		Unknown	United Kingdom	Clinical	Unknown
F17764	SRR617745	SAMN01815910	SRX204893	SRS375816		Unknown	Canada	Clinical	Unknown
T8015994	SRR10997241	SAMN13512632	SRX7658401	SRS6087286	PRJNA575185	2015	United States, Pittsburgh, PA	Unknown	Unknown
H7810724	SRR10997243	SAMN13512631	SRX7658399	SRS6087279		2015	United States, Pittsburgh, PA	Unknown	Unknown
928	SRR10997245	SAMN13512630	SRX7658397	SRS6087288		2015	United States, Pittsburgh, PA	Unknown	Unknown
925	SRR10997260	SAMN13512629	SRX7658382	SRS6087283		2015	United States, Pittsburgh, PA	Unknown	Unknown
VPCI 1155/P/13	SRR9265315	SAMN12011970	SRX6035655	SRS4939024	PRJNA548244	2017	India	Clinical	Unknown	DOI: 10.1016/j.fgb.2019.103265
VPCI 1882/14	SRR9265316	SAMN12011971	SRX6035654	SRS4939023		2017	India	Clinical	Unknown
VPCI 40/Ei/13/3/b	SRR9265317	SAMN12011972	SRX6035653	SRS4939022		2017	India	Environmental	Unknown
VPCI 497/Ei/12/3	SRR9265318	SAMN12011973	SRX6035652	SRS4939021		2017	India	Environmental	Unknown
SGAir0713	SRR9067511	SAMN11579506	SRX5843619	SRS4768555	PRJNA388547	2016	Singapore	Environmental	Unknown
V130-54	SRR8759697	SAMN11180823	SRX5550272	SRS4515819	PRJNA528395	2011	Netherlands	Clinical	Unknown	DOI:10.1016/j.fgb.2018.02.003 DOI: 10.1016/j.fgb.2019.05.005
V130-18	SRR8759698	SAMN11180822	SRX5550271	SRS4515818		2011	Netherlands	Clinical	Unknown
V130-14	SRR8759699	SAMN11180821	SRX5550270	SRS4515817		2011	Netherlands	Clinical	Unknown
V130-15	SRR8759700	SAMN11180820	SRX5550269	SRS4515816		2011	Netherlands	Clinical	0.5
V157-48	SRR8759701	SAMN11180827	SRX5550268	SRS4515815		2013	Netherlands	Clinical	Unknown
V157-40	SRR8759702	SAMN11180825	SRX5550266	SRS4515813		2013	Netherlands	Clinical	Unknown
V157-39	SRR8759703	SAMN11180824	SRX5550265	SRS4515812		2013	Netherlands	Clinical	Unknown
V157-59	SRR8759704	SAMN11180829	SRX5550264	SRS4515811		2013	Netherlands	Clinical	Unknown
V157-47	SRR8759705	SAMN11180826	SRX5550267	SRS4515814		2013	Netherlands	Clinical	Unknown
V157-62	SRR8759706	SAMN11180828	SRX5550263	SRS4515810		2013	Netherlands	Clinical	0.25
V157-61	SRR8759707	SAMN11180831	SRX5550262	SRS4515809		2013	Netherlands	Clinical	Unknown
V157-60	SRR8759708	SAMN11180830	SRX5550261	SRS4515808		2013	Netherlands	Clinical	Unknown
V157-80	SRR8759709	SAMN11180832	SRX5550260	SRS4515807		2013	Netherlands	Clinical	Unknown
AfA1	DRR237582	DRS145081	DRX227766	DRS145081	PRJDB10244	2016	Japan, Nagasaki, Sakamoto	Clinical	Unknown
AfA2	DRR237583	DRS145082	DRX227767	DRS145082		2016	Japan, Nagasaki, Sakamoto	Clinical	Unknown

## Sheet: Table S2
	#CHROM	POS	REF	ALT	INFO	F11628	Afu 343/P/11	Afu 124/E11	Afu 257/E11	Afu 218/E11	DI 15-105	F12865	F13535	CM3262	CM2733	CM2730	CM7560	CM4602	CM2495	CM7570	TP12	CM7632	TP32	CM4946	akuBKU80	CM3249	12-7505446	12-7504652	08-12-12-13	08-19-02-61	08-19-02-10	Afu 942/09	Afu 1042/09	CNM-CM8812	CNM-CM8714	CNM-CM8057	AF72	F12041	V157-62	B5233	Af65	12-7505220	09-7500806	12-7504462	12-7505054	08-36-03-25	08-31-08-91	08-19-02-30	10-01-02-27
Erg2	1	1340061	G	A	synonymous variant|LOW	.:.:.:.:.:.:.	.:.:.:.:.:.:.	.:.:.:.:.:.:.	.:.:.:.:.:.:.	.:.:.:.:.:.:.	.:.:.:.:.:.:.	.:.:.:.:.:.:.	.:.:.:.:.:.:.	.:.:.:.:.:.:.	.:.:.:.:.:.:.	.:.:.:.:.:.:.	.:.:.:.:.:.:.	.:.:.:.:.:.:.	.:.:.:.:.:.:.	.:.:.:.:.:.:.	.:.:.:.:.:.:.	.:.:.:.:.:.:.	.:.:.:.:.:.:.	.:.:.:.:.:.:.	Present	.:.:.:.:.:.:.	.:.:.:.:.:.:.	.:.:.:.:.:.:.	.:.:.:.:.:.:.	.:.:.:.:.:.:.	.:.:.:.:.:.:.	.:.:.:.:.:.:.	.:.:.:.:.:.:.	.:.:.:.:.:.:.	.:.:.:.:.:.:.	Present	Present	.:.:.:.:.:.:.	Present	.:.:.:.:.:.:.	.:.:.:.:.:.:.	.:.:.:.:.:.:.	Present	.:.:.:.:.:.:.	.:.:.:.:.:.:.	.:.:.:.:.:.:.	.:.:.:.:.:.:.	.:.:.:.:.:.:.	.:.:.:.:.:.:.
	1	1340456	G	A	synonymous variant|LOW	.:.:.:.:.:.:.	.:.:.:.:.:.:.	.:.:.:.:.:.:.	.:.:.:.:.:.:.	.:.:.:.:.:.:.	.:.:.:.:.:.:.	.:.:.:.:.:.:.	.:.:.:.:.:.:.	Present	Present	Present	Present	Present	Present	Present	.:.:.:.:.:.:.	.:.:.:.:.:.:.	Present	Present	.:.:.:.:.:.:.	Present	.:.:.:.:.:.:.	.:.:.:.:.:.:.	.:.:.:.:.:.:.	.:.:.:.:.:.:.	.:.:.:.:.:.:.	.:.:.:.:.:.:.	.:.:.:.:.:.:.	.:.:.:.:.:.:.	.:.:.:.:.:.:.	.:.:.:.:.:.:.	.:.:.:.:.:.:.	.:.:.:.:.:.:.	.:.:.:.:.:.:.	.:.:.:.:.:.:.	.:.:.:.:.:.:.	.:.:.:.:.:.:.	.:.:.:.:.:.:.	.:.:.:.:.:.:.	.:.:.:.:.:.:.	.:.:.:.:.:.:.	.:.:.:.:.:.:.	.:.:.:.:.:.:.	.:.:.:.:.:.:.
Erg4	1	2023118	A	G	synonymous variant|LOW	.:.:.:.:.:.:.	.:.:.:.:.:.:.	.:.:.:.:.:.:.	.:.:.:.:.:.:.	.:.:.:.:.:.:.	.:.:.:.:.:.:.	.:.:.:.:.:.:.	.:.:.:.:.:.:.	Present	Present	Present	Present	Present	Present	Present	.:.:.:.:.:.:.	.:.:.:.:.:.:.	Present	Present	.:.:.:.:.:.:.	Present	.:.:.:.:.:.:.	.:.:.:.:.:.:.	.:.:.:.:.:.:.	.:.:.:.:.:.:.	.:.:.:.:.:.:.	.:.:.:.:.:.:.	.:.:.:.:.:.:.	.:.:.:.:.:.:.	.:.:.:.:.:.:.	.:.:.:.:.:.:.	.:.:.:.:.:.:.	.:.:.:.:.:.:.	.:.:.:.:.:.:.	.:.:.:.:.:.:.	.:.:.:.:.:.:.	.:.:.:.:.:.:.	.:.:.:.:.:.:.	.:.:.:.:.:.:.	.:.:.:.:.:.:.	.:.:.:.:.:.:.	.:.:.:.:.:.:.	.:.:.:.:.:.:.	.:.:.:.:.:.:.
	1	2023147	C	A	missense variant|MODERATE|Ala -> Ser	.:.:.:.:.:.:.	.:.:.:.:.:.:.	.:.:.:.:.:.:.	.:.:.:.:.:.:.	.:.:.:.:.:.:.	Present	.:.:.:.:.:.:.	.:.:.:.:.:.:.	.:.:.:.:.:.:.	.:.:.:.:.:.:.	.:.:.:.:.:.:.	.:.:.:.:.:.:.	.:.:.:.:.:.:.	.:.:.:.:.:.:.	.:.:.:.:.:.:.	.:.:.:.:.:.:.	.:.:.:.:.:.:.	.:.:.:.:.:.:.	.:.:.:.:.:.:.	.:.:.:.:.:.:.	.:.:.:.:.:.:.	.:.:.:.:.:.:.	.:.:.:.:.:.:.	.:.:.:.:.:.:.	.:.:.:.:.:.:.	.:.:.:.:.:.:.	.:.:.:.:.:.:.	.:.:.:.:.:.:.	.:.:.:.:.:.:.	.:.:.:.:.:.:.	.:.:.:.:.:.:.	.:.:.:.:.:.:.	.:.:.:.:.:.:.	.:.:.:.:.:.:.	.:.:.:.:.:.:.	.:.:.:.:.:.:.	.:.:.:.:.:.:.	.:.:.:.:.:.:.	.:.:.:.:.:.:.	.:.:.:.:.:.:.	.:.:.:.:.:.:.	.:.:.:.:.:.:.	.:.:.:.:.:.:.	.:.:.:.:.:.:.
	1	2024092	A	G	synonymous variant|LOW	.:.:.:.:.:.:.	.:.:.:.:.:.:.	.:.:.:.:.:.:.	.:.:.:.:.:.:.	.:.:.:.:.:.:.	.:.:.:.:.:.:.	.:.:.:.:.:.:.	.:.:.:.:.:.:.	Present	Present	Present	Present	Present	Present	Present	.:.:.:.:.:.:.	.:.:.:.:.:.:.	Present	Present	.:.:.:.:.:.:.	Present	.:.:.:.:.:.:.	.:.:.:.:.:.:.	.:.:.:.:.:.:.	.:.:.:.:.:.:.	.:.:.:.:.:.:.	.:.:.:.:.:.:.	.:.:.:.:.:.:.	.:.:.:.:.:.:.	.:.:.:.:.:.:.	.:.:.:.:.:.:.	.:.:.:.:.:.:.	.:.:.:.:.:.:.	.:.:.:.:.:.:.	.:.:.:.:.:.:.	.:.:.:.:.:.:.	.:.:.:.:.:.:.	.:.:.:.:.:.:.	.:.:.:.:.:.:.	.:.:.:.:.:.:.	.:.:.:.:.:.:.	.:.:.:.:.:.:.	.:.:.:.:.:.:.	.:.:.:.:.:.:.
	1	2024167	C	G	synonymous variant|LOW	.:.:.:.:.:.:.	.:.:.:.:.:.:.	.:.:.:.:.:.:.	.:.:.:.:.:.:.	.:.:.:.:.:.:.	.:.:.:.:.:.:.	.:.:.:.:.:.:.	.:.:.:.:.:.:.	Present	Present	Present	Present	Present	Present	Present	.:.:.:.:.:.:.	.:.:.:.:.:.:.	Present	Present	.:.:.:.:.:.:.	Present	.:.:.:.:.:.:.	.:.:.:.:.:.:.	.:.:.:.:.:.:.	.:.:.:.:.:.:.	.:.:.:.:.:.:.	.:.:.:.:.:.:.	.:.:.:.:.:.:.	.:.:.:.:.:.:.	.:.:.:.:.:.:.	.:.:.:.:.:.:.	.:.:.:.:.:.:.	.:.:.:.:.:.:.	.:.:.:.:.:.:.	.:.:.:.:.:.:.	.:.:.:.:.:.:.	.:.:.:.:.:.:.	.:.:.:.:.:.:.	.:.:.:.:.:.:.	.:.:.:.:.:.:.	.:.:.:.:.:.:.	.:.:.:.:.:.:.	.:.:.:.:.:.:.	.:.:.:.:.:.:.
	1	2024449	G	A	synonymous variant|LOW	.:.:.:.:.:.:.	.:.:.:.:.:.:.	.:.:.:.:.:.:.	.:.:.:.:.:.:.	.:.:.:.:.:.:.	.:.:.:.:.:.:.	.:.:.:.:.:.:.	.:.:.:.:.:.:.	.:.:.:.:.:.:.	.:.:.:.:.:.:.	.:.:.:.:.:.:.	.:.:.:.:.:.:.	.:.:.:.:.:.:.	.:.:.:.:.:.:.	.:.:.:.:.:.:.	.:.:.:.:.:.:.	.:.:.:.:.:.:.	.:.:.:.:.:.:.	.:.:.:.:.:.:.	.:.:.:.:.:.:.	.:.:.:.:.:.:.	.:.:.:.:.:.:.	.:.:.:.:.:.:.	.:.:.:.:.:.:.	.:.:.:.:.:.:.	.:.:.:.:.:.:.	.:.:.:.:.:.:.	.:.:.:.:.:.:.	.:.:.:.:.:.:.	.:.:.:.:.:.:.	.:.:.:.:.:.:.	.:.:.:.:.:.:.	.:.:.:.:.:.:.	.:.:.:.:.:.:.	.:.:.:.:.:.:.	.:.:.:.:.:.:.	.:.:.:.:.:.:.	.:.:.:.:.:.:.	.:.:.:.:.:.:.	.:.:.:.:.:.:.	.:.:.:.:.:.:.	.:.:.:.:.:.:.	.:.:.:.:.:.:.	.:.:.:.:.:.:.
	1	2024584	G	A	synonymous variant|LOW	.:.:.:.:.:.:.	.:.:.:.:.:.:.	.:.:.:.:.:.:.	.:.:.:.:.:.:.	.:.:.:.:.:.:.	.:.:.:.:.:.:.	.:.:.:.:.:.:.	.:.:.:.:.:.:.	.:.:.:.:.:.:.	.:.:.:.:.:.:.	Present	Present	.:.:.:.:.:.:.	Present	.:.:.:.:.:.:.	.:.:.:.:.:.:.	.:.:.:.:.:.:.	Present	.:.:.:.:.:.:.	.:.:.:.:.:.:.	.:.:.:.:.:.:.	.:.:.:.:.:.:.	.:.:.:.:.:.:.	.:.:.:.:.:.:.	.:.:.:.:.:.:.	.:.:.:.:.:.:.	.:.:.:.:.:.:.	.:.:.:.:.:.:.	.:.:.:.:.:.:.	.:.:.:.:.:.:.	.:.:.:.:.:.:.	.:.:.:.:.:.:.	.:.:.:.:.:.:.	.:.:.:.:.:.:.	.:.:.:.:.:.:.	.:.:.:.:.:.:.	.:.:.:.:.:.:.	.:.:.:.:.:.:.	.:.:.:.:.:.:.	.:.:.:.:.:.:.	.:.:.:.:.:.:.	.:.:.:.:.:.:.	.:.:.:.:.:.:.	.:.:.:.:.:.:.
	1	2024598	G	T	missense variant|MODERATE|His -> Asn	.:.:.:.:.:.:.	Present	Present	Present	Present	.:.:.:.:.:.:.	.:.:.:.:.:.:.	.:.:.:.:.:.:.	Present	Present	Present	Present	.:.:.:.:.:.:.	Present	Present	.:.:.:.:.:.:.	.:.:.:.:.:.:.	Present	Present	Present	Present	Present	.:.:.:.:.:.:.	Present	Present	.:.:.:.:.:.:.	Present	Present	Present	Present	Present	Present	.:.:.:.:.:.:.	.:.:.:.:.:.:.	.:.:.:.:.:.:.	.:.:.:.:.:.:.	.:.:.:.:.:.:.	Present	Present	.:.:.:.:.:.:.	.:.:.:.:.:.:.	.:.:.:.:.:.:.	Present	Present
	1	2024686	T	G	synonymous variant|LOW	.:.:.:.:.:.:.	.:.:.:.:.:.:.	.:.:.:.:.:.:.	.:.:.:.:.:.:.	.:.:.:.:.:.:.	.:.:.:.:.:.:.	.:.:.:.:.:.:.	.:.:.:.:.:.:.	Present	Present	Present	Present	Present	Present	Present	.:.:.:.:.:.:.	.:.:.:.:.:.:.	Present	Present	.:.:.:.:.:.:.	Present	.:.:.:.:.:.:.	.:.:.:.:.:.:.	.:.:.:.:.:.:.	.:.:.:.:.:.:.	.:.:.:.:.:.:.	.:.:.:.:.:.:.	.:.:.:.:.:.:.	.:.:.:.:.:.:.	.:.:.:.:.:.:.	.:.:.:.:.:.:.	.:.:.:.:.:.:.	.:.:.:.:.:.:.	.:.:.:.:.:.:.	.:.:.:.:.:.:.	.:.:.:.:.:.:.	.:.:.:.:.:.:.	.:.:.:.:.:.:.	.:.:.:.:.:.:.	.:.:.:.:.:.:.	.:.:.:.:.:.:.	.:.:.:.:.:.:.	.:.:.:.:.:.:.	.:.:.:.:.:.:.
	1	2024739	C	G	missense variant|MODERATE|Asp -> His	.:.:.:.:.:.:.	.:.:.:.:.:.:.	.:.:.:.:.:.:.	.:.:.:.:.:.:.	.:.:.:.:.:.:.	.:.:.:.:.:.:.	.:.:.:.:.:.:.	.:.:.:.:.:.:.	.:.:.:.:.:.:.	.:.:.:.:.:.:.	.:.:.:.:.:.:.	.:.:.:.:.:.:.	.:.:.:.:.:.:.	.:.:.:.:.:.:.	.:.:.:.:.:.:.	.:.:.:.:.:.:.	.:.:.:.:.:.:.	.:.:.:.:.:.:.	.:.:.:.:.:.:.	.:.:.:.:.:.:.	.:.:.:.:.:.:.	.:.:.:.:.:.:.	.:.:.:.:.:.:.	.:.:.:.:.:.:.	.:.:.:.:.:.:.	.:.:.:.:.:.:.	.:.:.:.:.:.:.	.:.:.:.:.:.:.	.:.:.:.:.:.:.	.:.:.:.:.:.:.	.:.:.:.:.:.:.	.:.:.:.:.:.:.	.:.:.:.:.:.:.	.:.:.:.:.:.:.	.:.:.:.:.:.:.	.:.:.:.:.:.:.	.:.:.:.:.:.:.	.:.:.:.:.:.:.	.:.:.:.:.:.:.	.:.:.:.:.:.:.	.:.:.:.:.:.:.	.:.:.:.:.:.:.	.:.:.:.:.:.:.	.:.:.:.:.:.:.
	1	2024832	G	A	splice region variant&intron variant|LOW	.:.:.:.:.:.:.	.:.:.:.:.:.:.	.:.:.:.:.:.:.	.:.:.:.:.:.:.	.:.:.:.:.:.:.	.:.:.:.:.:.:.	.:.:.:.:.:.:.	.:.:.:.:.:.:.	Present	Present	Present	Present	Present	Present	Present	.:.:.:.:.:.:.	.:.:.:.:.:.:.	Present	Present	.:.:.:.:.:.:.	Present	.:.:.:.:.:.:.	.:.:.:.:.:.:.	.:.:.:.:.:.:.	.:.:.:.:.:.:.	.:.:.:.:.:.:.	.:.:.:.:.:.:.	.:.:.:.:.:.:.	.:.:.:.:.:.:.	.:.:.:.:.:.:.	.:.:.:.:.:.:.	.:.:.:.:.:.:.	.:.:.:.:.:.:.	.:.:.:.:.:.:.	.:.:.:.:.:.:.	.:.:.:.:.:.:.	.:.:.:.:.:.:.	.:.:.:.:.:.:.	.:.:.:.:.:.:.	.:.:.:.:.:.:.	.:.:.:.:.:.:.	.:.:.:.:.:.:.	.:.:.:.:.:.:.	.:.:.:.:.:.:.
	1	2024877	G	A	Intron	.:.:.:.:.:.:.	.:.:.:.:.:.:.	.:.:.:.:.:.:.	.:.:.:.:.:.:.	.:.:.:.:.:.:.	.:.:.:.:.:.:.	.:.:.:.:.:.:.	.:.:.:.:.:.:.	.:.:.:.:.:.:.	.:.:.:.:.:.:.	.:.:.:.:.:.:.	.:.:.:.:.:.:.	.:.:.:.:.:.:.	.:.:.:.:.:.:.	.:.:.:.:.:.:.	.:.:.:.:.:.:.	.:.:.:.:.:.:.	.:.:.:.:.:.:.	.:.:.:.:.:.:.	.:.:.:.:.:.:.	.:.:.:.:.:.:.	.:.:.:.:.:.:.	.:.:.:.:.:.:.	.:.:.:.:.:.:.	.:.:.:.:.:.:.	.:.:.:.:.:.:.	.:.:.:.:.:.:.	.:.:.:.:.:.:.	.:.:.:.:.:.:.	.:.:.:.:.:.:.	.:.:.:.:.:.:.	.:.:.:.:.:.:.	.:.:.:.:.:.:.	.:.:.:.:.:.:.	.:.:.:.:.:.:.	.:.:.:.:.:.:.	.:.:.:.:.:.:.	.:.:.:.:.:.:.	.:.:.:.:.:.:.	.:.:.:.:.:.:.	.:.:.:.:.:.:.	.:.:.:.:.:.:.	.:.:.:.:.:.:.	.:.:.:.:.:.:.
	1	2025010	C	T	synonymous variant|LOW	.:.:.:.:.:.:.	.:.:.:.:.:.:.	.:.:.:.:.:.:.	.:.:.:.:.:.:.	.:.:.:.:.:.:.	.:.:.:.:.:.:.	.:.:.:.:.:.:.	.:.:.:.:.:.:.	Present	Present	Present	Present	Present	Present	Present	.:.:.:.:.:.:.	.:.:.:.:.:.:.	Present	Present	.:.:.:.:.:.:.	Present	.:.:.:.:.:.:.	.:.:.:.:.:.:.	.:.:.:.:.:.:.	.:.:.:.:.:.:.	.:.:.:.:.:.:.	.:.:.:.:.:.:.	.:.:.:.:.:.:.	.:.:.:.:.:.:.	.:.:.:.:.:.:.	.:.:.:.:.:.:.	.:.:.:.:.:.:.	.:.:.:.:.:.:.	.:.:.:.:.:.:.	.:.:.:.:.:.:.	.:.:.:.:.:.:.	.:.:.:.:.:.:.	.:.:.:.:.:.:.	.:.:.:.:.:.:.	.:.:.:.:.:.:.	.:.:.:.:.:.:.	.:.:.:.:.:.:.	.:.:.:.:.:.:.	.:.:.:.:.:.:.
Erg3	2	61377	A	T	missense variant|MODERATE|Met -> Leu	.:.:.:.:.:.:.	.:.:.:.:.:.:.	.:.:.:.:.:.:.	.:.:.:.:.:.:.	.:.:.:.:.:.:.	.:.:.:.:.:.:.	.:.:.:.:.:.:.	.:.:.:.:.:.:.	.:.:.:.:.:.:.	.:.:.:.:.:.:.	.:.:.:.:.:.:.	.:.:.:.:.:.:.	.:.:.:.:.:.:.	.:.:.:.:.:.:.	.:.:.:.:.:.:.	.:.:.:.:.:.:.	Present	.:.:.:.:.:.:.	.:.:.:.:.:.:.	.:.:.:.:.:.:.	.:.:.:.:.:.:.	.:.:.:.:.:.:.	.:.:.:.:.:.:.	.:.:.:.:.:.:.	.:.:.:.:.:.:.	.:.:.:.:.:.:.	.:.:.:.:.:.:.	.:.:.:.:.:.:.	.:.:.:.:.:.:.	.:.:.:.:.:.:.	.:.:.:.:.:.:.	.:.:.:.:.:.:.	.:.:.:.:.:.:.	.:.:.:.:.:.:.	.:.:.:.:.:.:.	.:.:.:.:.:.:.	.:.:.:.:.:.:.	Present	Present	.:.:.:.:.:.:.	.:.:.:.:.:.:.	.:.:.:.:.:.:.	.:.:.:.:.:.:.	.:.:.:.:.:.:.
	2	61510	A	G	missense variant|MODERATE|Asp -> Gly	.:.:.:.:.:.:.	.:.:.:.:.:.:.	.:.:.:.:.:.:.	.:.:.:.:.:.:.	.:.:.:.:.:.:.	Present	.:.:.:.:.:.:.	.:.:.:.:.:.:.	.:.:.:.:.:.:.	.:.:.:.:.:.:.	.:.:.:.:.:.:.	.:.:.:.:.:.:.	.:.:.:.:.:.:.	.:.:.:.:.:.:.	.:.:.:.:.:.:.	.:.:.:.:.:.:.	.:.:.:.:.:.:.	.:.:.:.:.:.:.	.:.:.:.:.:.:.	.:.:.:.:.:.:.	.:.:.:.:.:.:.	.:.:.:.:.:.:.	.:.:.:.:.:.:.	.:.:.:.:.:.:.	.:.:.:.:.:.:.	.:.:.:.:.:.:.	.:.:.:.:.:.:.	.:.:.:.:.:.:.	.:.:.:.:.:.:.	.:.:.:.:.:.:.	.:.:.:.:.:.:.	.:.:.:.:.:.:.	.:.:.:.:.:.:.	.:.:.:.:.:.:.	.:.:.:.:.:.:.	.:.:.:.:.:.:.	.:.:.:.:.:.:.	.:.:.:.:.:.:.	.:.:.:.:.:.:.	.:.:.:.:.:.:.	.:.:.:.:.:.:.	.:.:.:.:.:.:.	.:.:.:.:.:.:.	.:.:.:.:.:.:.
	2	61520	C	A	synonymous variant|LOW	.:.:.:.:.:.:.	.:.:.:.:.:.:.	.:.:.:.:.:.:.	.:.:.:.:.:.:.	.:.:.:.:.:.:.	.:.:.:.:.:.:.	.:.:.:.:.:.:.	.:.:.:.:.:.:.	.:.:.:.:.:.:.	.:.:.:.:.:.:.	.:.:.:.:.:.:.	.:.:.:.:.:.:.	.:.:.:.:.:.:.	.:.:.:.:.:.:.	.:.:.:.:.:.:.	.:.:.:.:.:.:.	.:.:.:.:.:.:.	.:.:.:.:.:.:.	.:.:.:.:.:.:.	Present	.:.:.:.:.:.:.	.:.:.:.:.:.:.	.:.:.:.:.:.:.	.:.:.:.:.:.:.	.:.:.:.:.:.:.	.:.:.:.:.:.:.	.:.:.:.:.:.:.	.:.:.:.:.:.:.	.:.:.:.:.:.:.	.:.:.:.:.:.:.	.:.:.:.:.:.:.	.:.:.:.:.:.:.	.:.:.:.:.:.:.	.:.:.:.:.:.:.	.:.:.:.:.:.:.	.:.:.:.:.:.:.	.:.:.:.:.:.:.	.:.:.:.:.:.:.	.:.:.:.:.:.:.	.:.:.:.:.:.:.	.:.:.:.:.:.:.	.:.:.:.:.:.:.	.:.:.:.:.:.:.	.:.:.:.:.:.:.
	2	61543	C	T	missense variant|MODERATE|Thr -> Ile	.:.:.:.:.:.:.	.:.:.:.:.:.:.	.:.:.:.:.:.:.	.:.:.:.:.:.:.	.:.:.:.:.:.:.	.:.:.:.:.:.:.	.:.:.:.:.:.:.	.:.:.:.:.:.:.	.:.:.:.:.:.:.	.:.:.:.:.:.:.	.:.:.:.:.:.:.	.:.:.:.:.:.:.	.:.:.:.:.:.:.	.:.:.:.:.:.:.	.:.:.:.:.:.:.	.:.:.:.:.:.:.	.:.:.:.:.:.:.	.:.:.:.:.:.:.	.:.:.:.:.:.:.	Present	.:.:.:.:.:.:.	.:.:.:.:.:.:.	.:.:.:.:.:.:.	.:.:.:.:.:.:.	.:.:.:.:.:.:.	.:.:.:.:.:.:.	.:.:.:.:.:.:.	.:.:.:.:.:.:.	.:.:.:.:.:.:.	.:.:.:.:.:.:.	.:.:.:.:.:.:.	Present	.:.:.:.:.:.:.	Present	.:.:.:.:.:.:.	.:.:.:.:.:.:.	.:.:.:.:.:.:.	.:.:.:.:.:.:.	.:.:.:.:.:.:.	.:.:.:.:.:.:.	.:.:.:.:.:.:.	.:.:.:.:.:.:.	.:.:.:.:.:.:.	.:.:.:.:.:.:.
	2	61630	A	T	missense variant|MODERATE|Lys -> Ile	.:.:.:.:.:.:.	.:.:.:.:.:.:.	.:.:.:.:.:.:.	.:.:.:.:.:.:.	.:.:.:.:.:.:.	.:.:.:.:.:.:.	.:.:.:.:.:.:.	.:.:.:.:.:.:.	.:.:.:.:.:.:.	.:.:.:.:.:.:.	.:.:.:.:.:.:.	.:.:.:.:.:.:.	.:.:.:.:.:.:.	.:.:.:.:.:.:.	.:.:.:.:.:.:.	.:.:.:.:.:.:.	.:.:.:.:.:.:.	Present	.:.:.:.:.:.:.	.:.:.:.:.:.:.	.:.:.:.:.:.:.	.:.:.:.:.:.:.	.:.:.:.:.:.:.	.:.:.:.:.:.:.	.:.:.:.:.:.:.	.:.:.:.:.:.:.	.:.:.:.:.:.:.	.:.:.:.:.:.:.	.:.:.:.:.:.:.	.:.:.:.:.:.:.	.:.:.:.:.:.:.	.:.:.:.:.:.:.	.:.:.:.:.:.:.	.:.:.:.:.:.:.	.:.:.:.:.:.:.	.:.:.:.:.:.:.	.:.:.:.:.:.:.	.:.:.:.:.:.:.	.:.:.:.:.:.:.	.:.:.:.:.:.:.	.:.:.:.:.:.:.	.:.:.:.:.:.:.	.:.:.:.:.:.:.	.:.:.:.:.:.:.
	2	61745	C	A	synonymous variant|LOW	.:.:.:.:.:.:.	.:.:.:.:.:.:.	.:.:.:.:.:.:.	.:.:.:.:.:.:.	.:.:.:.:.:.:.	.:.:.:.:.:.:.	.:.:.:.:.:.:.	.:.:.:.:.:.:.	.:.:.:.:.:.:.	.:.:.:.:.:.:.	.:.:.:.:.:.:.	.:.:.:.:.:.:.	.:.:.:.:.:.:.	.:.:.:.:.:.:.	.:.:.:.:.:.:.	.:.:.:.:.:.:.	.:.:.:.:.:.:.	.:.:.:.:.:.:.	.:.:.:.:.:.:.	Present	.:.:.:.:.:.:.	.:.:.:.:.:.:.	.:.:.:.:.:.:.	.:.:.:.:.:.:.	.:.:.:.:.:.:.	.:.:.:.:.:.:.	.:.:.:.:.:.:.	.:.:.:.:.:.:.	.:.:.:.:.:.:.	.:.:.:.:.:.:.	.:.:.:.:.:.:.	Present	.:.:.:.:.:.:.	Present	.:.:.:.:.:.:.	.:.:.:.:.:.:.	.:.:.:.:.:.:.	.:.:.:.:.:.:.	.:.:.:.:.:.:.	.:.:.:.:.:.:.	.:.:.:.:.:.:.	.:.:.:.:.:.:.	.:.:.:.:.:.:.	.:.:.:.:.:.:.
	2	61972	T	C	missense variant|MODERATE|Ile -> Thr	Present	Present	Present	Present	Present	Present	Present	Present	Present	Present	Present	Present	Present	Present	Present	Present	Present	Present	Present	Present	Present	Present	Present	Present	Present	Present	Present	Present	Present	Present	Present	Present	Present	Present	Present	Present	Present	Present	Present	Present	Present	Present	Present	Present
	2	62002	A	T	missense variant|MODERATE|Tyr -> Phe	.:.:.:.:.:.:.	.:.:.:.:.:.:.	.:.:.:.:.:.:.	.:.:.:.:.:.:.	.:.:.:.:.:.:.	.:.:.:.:.:.:.	.:.:.:.:.:.:.	.:.:.:.:.:.:.	.:.:.:.:.:.:.	.:.:.:.:.:.:.	.:.:.:.:.:.:.	.:.:.:.:.:.:.	.:.:.:.:.:.:.	.:.:.:.:.:.:.	.:.:.:.:.:.:.	.:.:.:.:.:.:.	.:.:.:.:.:.:.	.:.:.:.:.:.:.	.:.:.:.:.:.:.	Present	.:.:.:.:.:.:.	.:.:.:.:.:.:.	.:.:.:.:.:.:.	.:.:.:.:.:.:.	.:.:.:.:.:.:.	.:.:.:.:.:.:.	.:.:.:.:.:.:.	.:.:.:.:.:.:.	.:.:.:.:.:.:.	.:.:.:.:.:.:.	.:.:.:.:.:.:.	Present	.:.:.:.:.:.:.	Present	.:.:.:.:.:.:.	.:.:.:.:.:.:.	.:.:.:.:.:.:.	.:.:.:.:.:.:.	.:.:.:.:.:.:.	.:.:.:.:.:.:.	.:.:.:.:.:.:.	.:.:.:.:.:.:.	.:.:.:.:.:.:.	.:.:.:.:.:.:.
	2	62036	G	A	synonymous variant|LOW	.:.:.:.:.:.:.	.:.:.:.:.:.:.	.:.:.:.:.:.:.	.:.:.:.:.:.:.	.:.:.:.:.:.:.	.:.:.:.:.:.:.	.:.:.:.:.:.:.	.:.:.:.:.:.:.	Present	Present	Present	Present	Present	Present	Present	.:.:.:.:.:.:.	.:.:.:.:.:.:.	Present	Present	Present	Present	.:.:.:.:.:.:.	.:.:.:.:.:.:.	.:.:.:.:.:.:.	.:.:.:.:.:.:.	.:.:.:.:.:.:.	.:.:.:.:.:.:.	.:.:.:.:.:.:.	.:.:.:.:.:.:.	.:.:.:.:.:.:.	.:.:.:.:.:.:.	Present	.:.:.:.:.:.:.	Present	.:.:.:.:.:.:.	.:.:.:.:.:.:.	.:.:.:.:.:.:.	.:.:.:.:.:.:.	.:.:.:.:.:.:.	.:.:.:.:.:.:.	.:.:.:.:.:.:.	.:.:.:.:.:.:.	.:.:.:.:.:.:.	.:.:.:.:.:.:.
	2	62145	A	G	missense variant|MODERATE|Thr -> Ala	.:.:.:.:.:.:.	.:.:.:.:.:.:.	.:.:.:.:.:.:.	.:.:.:.:.:.:.	.:.:.:.:.:.:.	.:.:.:.:.:.:.	.:.:.:.:.:.:.	.:.:.:.:.:.:.	.:.:.:.:.:.:.	.:.:.:.:.:.:.	.:.:.:.:.:.:.	.:.:.:.:.:.:.	.:.:.:.:.:.:.	.:.:.:.:.:.:.	.:.:.:.:.:.:.	.:.:.:.:.:.:.	.:.:.:.:.:.:.	Present	.:.:.:.:.:.:.	.:.:.:.:.:.:.	.:.:.:.:.:.:.	.:.:.:.:.:.:.	.:.:.:.:.:.:.	.:.:.:.:.:.:.	.:.:.:.:.:.:.	.:.:.:.:.:.:.	.:.:.:.:.:.:.	.:.:.:.:.:.:.	.:.:.:.:.:.:.	.:.:.:.:.:.:.	.:.:.:.:.:.:.	.:.:.:.:.:.:.	.:.:.:.:.:.:.	.:.:.:.:.:.:.	.:.:.:.:.:.:.	.:.:.:.:.:.:.	.:.:.:.:.:.:.	.:.:.:.:.:.:.	.:.:.:.:.:.:.	.:.:.:.:.:.:.	.:.:.:.:.:.:.	.:.:.:.:.:.:.	.:.:.:.:.:.:.	.:.:.:.:.:.:.
Erg13	3	2760712	T	C	synonymous variant|LOW	.:.:.:.:.:.:.	.:.:.:.:.:.:.	.:.:.:.:.:.:.	.:.:.:.:.:.:.	.:.:.:.:.:.:.	.:.:.:.:.:.:.	.:.:.:.:.:.:.	.:.:.:.:.:.:.	Present	Present	Present	Present	Present	Present	Present	.:.:.:.:.:.:.	.:.:.:.:.:.:.	Present	Present	.:.:.:.:.:.:.	Present	.:.:.:.:.:.:.	.:.:.:.:.:.:.	.:.:.:.:.:.:.	.:.:.:.:.:.:.	.:.:.:.:.:.:.	.:.:.:.:.:.:.	.:.:.:.:.:.:.	.:.:.:.:.:.:.	.:.:.:.:.:.:.	.:.:.:.:.:.:.	.:.:.:.:.:.:.	.:.:.:.:.:.:.	.:.:.:.:.:.:.	.:.:.:.:.:.:.	.:.:.:.:.:.:.	.:.:.:.:.:.:.	.:.:.:.:.:.:.	.:.:.:.:.:.:.	.:.:.:.:.:.:.	.:.:.:.:.:.:.	.:.:.:.:.:.:.	.:.:.:.:.:.:.	.:.:.:.:.:.:.
	3	2760950	A	T	Intron	.:.:.:.:.:.:.	.:.:.:.:.:.:.	.:.:.:.:.:.:.	.:.:.:.:.:.:.	.:.:.:.:.:.:.	.:.:.:.:.:.:.	.:.:.:.:.:.:.	.:.:.:.:.:.:.	Present	Present	Present	Present	Present	Present	Present	.:.:.:.:.:.:.	.:.:.:.:.:.:.	Present	Present	.:.:.:.:.:.:.	Present	.:.:.:.:.:.:.	.:.:.:.:.:.:.	.:.:.:.:.:.:.	.:.:.:.:.:.:.	.:.:.:.:.:.:.	.:.:.:.:.:.:.	.:.:.:.:.:.:.	.:.:.:.:.:.:.	.:.:.:.:.:.:.	.:.:.:.:.:.:.	.:.:.:.:.:.:.	.:.:.:.:.:.:.	.:.:.:.:.:.:.	.:.:.:.:.:.:.	.:.:.:.:.:.:.	.:.:.:.:.:.:.	.:.:.:.:.:.:.	.:.:.:.:.:.:.	.:.:.:.:.:.:.	.:.:.:.:.:.:.	.:.:.:.:.:.:.	.:.:.:.:.:.:.	.:.:.:.:.:.:.
	3	2761012	C	A	synonymous variant|LOW	.:.:.:.:.:.:.	.:.:.:.:.:.:.	.:.:.:.:.:.:.	.:.:.:.:.:.:.	.:.:.:.:.:.:.	Present	.:.:.:.:.:.:.	.:.:.:.:.:.:.	.:.:.:.:.:.:.	.:.:.:.:.:.:.	.:.:.:.:.:.:.	.:.:.:.:.:.:.	.:.:.:.:.:.:.	.:.:.:.:.:.:.	.:.:.:.:.:.:.	.:.:.:.:.:.:.	.:.:.:.:.:.:.	.:.:.:.:.:.:.	.:.:.:.:.:.:.	Present	.:.:.:.:.:.:.	.:.:.:.:.:.:.	.:.:.:.:.:.:.	.:.:.:.:.:.:.	.:.:.:.:.:.:.	.:.:.:.:.:.:.	.:.:.:.:.:.:.	.:.:.:.:.:.:.	.:.:.:.:.:.:.	.:.:.:.:.:.:.	.:.:.:.:.:.:.	Present	.:.:.:.:.:.:.	Present	.:.:.:.:.:.:.	.:.:.:.:.:.:.	.:.:.:.:.:.:.	.:.:.:.:.:.:.	.:.:.:.:.:.:.	.:.:.:.:.:.:.	.:.:.:.:.:.:.	.:.:.:.:.:.:.	.:.:.:.:.:.:.	.:.:.:.:.:.:.
	3	2761099	G	A	synonymous variant|LOW	.:.:.:.:.:.:.	.:.:.:.:.:.:.	.:.:.:.:.:.:.	.:.:.:.:.:.:.	.:.:.:.:.:.:.	.:.:.:.:.:.:.	.:.:.:.:.:.:.	.:.:.:.:.:.:.	.:.:.:.:.:.:.	.:.:.:.:.:.:.	.:.:.:.:.:.:.	.:.:.:.:.:.:.	.:.:.:.:.:.:.	.:.:.:.:.:.:.	.:.:.:.:.:.:.	.:.:.:.:.:.:.	.:.:.:.:.:.:.	.:.:.:.:.:.:.	.:.:.:.:.:.:.	.:.:.:.:.:.:.	.:.:.:.:.:.:.	.:.:.:.:.:.:.	.:.:.:.:.:.:.	.:.:.:.:.:.:.	.:.:.:.:.:.:.	.:.:.:.:.:.:.	.:.:.:.:.:.:.	.:.:.:.:.:.:.	.:.:.:.:.:.:.	.:.:.:.:.:.:.	.:.:.:.:.:.:.	.:.:.:.:.:.:.	.:.:.:.:.:.:.	.:.:.:.:.:.:.	.:.:.:.:.:.:.	.:.:.:.:.:.:.	.:.:.:.:.:.:.	.:.:.:.:.:.:.	.:.:.:.:.:.:.	.:.:.:.:.:.:.	.:.:.:.:.:.:.	.:.:.:.:.:.:.	.:.:.:.:.:.:.	.:.:.:.:.:.:.
	3	2761228	T	C	synonymous variant|LOW	Present	Present	Present	Present	Present	.:.:.:.:.:.:.	Present	Present	.:.:.:.:.:.:.	.:.:.:.:.:.:.	.:.:.:.:.:.:.	.:.:.:.:.:.:.	.:.:.:.:.:.:.	.:.:.:.:.:.:.	.:.:.:.:.:.:.	.:.:.:.:.:.:.	.:.:.:.:.:.:.	.:.:.:.:.:.:.	.:.:.:.:.:.:.	.:.:.:.:.:.:.	.:.:.:.:.:.:.	Present	Present	Present	Present	Present	Present	Present	Present	Present	.:.:.:.:.:.:.	.:.:.:.:.:.:.	Present	.:.:.:.:.:.:.	Present	Present	Present	.:.:.:.:.:.:.	.:.:.:.:.:.:.	Present	Present	Present	.:.:.:.:.:.:.	Present
	3	2761395	C	T	missense variant|MODERATE|Thr -> Ile	.:.:.:.:.:.:.	.:.:.:.:.:.:.	.:.:.:.:.:.:.	.:.:.:.:.:.:.	.:.:.:.:.:.:.	.:.:.:.:.:.:.	.:.:.:.:.:.:.	.:.:.:.:.:.:.	.:.:.:.:.:.:.	.:.:.:.:.:.:.	.:.:.:.:.:.:.	.:.:.:.:.:.:.	.:.:.:.:.:.:.	.:.:.:.:.:.:.	.:.:.:.:.:.:.	.:.:.:.:.:.:.	Present	.:.:.:.:.:.:.	.:.:.:.:.:.:.	.:.:.:.:.:.:.	.:.:.:.:.:.:.	.:.:.:.:.:.:.	.:.:.:.:.:.:.	.:.:.:.:.:.:.	.:.:.:.:.:.:.	.:.:.:.:.:.:.	.:.:.:.:.:.:.	.:.:.:.:.:.:.	.:.:.:.:.:.:.	.:.:.:.:.:.:.	.:.:.:.:.:.:.	.:.:.:.:.:.:.	.:.:.:.:.:.:.	.:.:.:.:.:.:.	.:.:.:.:.:.:.	.:.:.:.:.:.:.	.:.:.:.:.:.:.	.:.:.:.:.:.:.	.:.:.:.:.:.:.	.:.:.:.:.:.:.	.:.:.:.:.:.:.	.:.:.:.:.:.:.	.:.:.:.:.:.:.	.:.:.:.:.:.:.
	3	2761417	G	A	synonymous variant|LOW	.:.:.:.:.:.:.	.:.:.:.:.:.:.	.:.:.:.:.:.:.	.:.:.:.:.:.:.	.:.:.:.:.:.:.	.:.:.:.:.:.:.	.:.:.:.:.:.:.	.:.:.:.:.:.:.	Present	Present	Present	Present	Present	Present	Present	.:.:.:.:.:.:.	.:.:.:.:.:.:.	Present	Present	.:.:.:.:.:.:.	Present	.:.:.:.:.:.:.	.:.:.:.:.:.:.	.:.:.:.:.:.:.	.:.:.:.:.:.:.	.:.:.:.:.:.:.	.:.:.:.:.:.:.	.:.:.:.:.:.:.	.:.:.:.:.:.:.	.:.:.:.:.:.:.	.:.:.:.:.:.:.	.:.:.:.:.:.:.	.:.:.:.:.:.:.	.:.:.:.:.:.:.	.:.:.:.:.:.:.	.:.:.:.:.:.:.	.:.:.:.:.:.:.	.:.:.:.:.:.:.	.:.:.:.:.:.:.	.:.:.:.:.:.:.	.:.:.:.:.:.:.	.:.:.:.:.:.:.	.:.:.:.:.:.:.	.:.:.:.:.:.:.
	3	2761538	G	A	missense variant|MODERATE|Val -> Ile	Present	Present	Present	Present	Present	Present	Present	Present	Present	Present	Present	Present	Present	Present	Present	.:.:.:.:.:.:.	.:.:.:.:.:.:.	Present	Present	Present	Present	Present	Present	Present	Present	Present	Present	Present	Present	Present	Present	Present	Present	Present	Present	Present	Present	Present	Present	Present	Present	Present	Present	Present
	3	2761567	T	C	synonymous variant|LOW	.:.:.:.:.:.:.	.:.:.:.:.:.:.	.:.:.:.:.:.:.	.:.:.:.:.:.:.	.:.:.:.:.:.:.	.:.:.:.:.:.:.	.:.:.:.:.:.:.	.:.:.:.:.:.:.	Present	Present	Present	Present	Present	Present	Present	.:.:.:.:.:.:.	.:.:.:.:.:.:.	Present	Present	.:.:.:.:.:.:.	Present	.:.:.:.:.:.:.	.:.:.:.:.:.:.	.:.:.:.:.:.:.	.:.:.:.:.:.:.	.:.:.:.:.:.:.	.:.:.:.:.:.:.	.:.:.:.:.:.:.	.:.:.:.:.:.:.	.:.:.:.:.:.:.	.:.:.:.:.:.:.	.:.:.:.:.:.:.	.:.:.:.:.:.:.	.:.:.:.:.:.:.	.:.:.:.:.:.:.	.:.:.:.:.:.:.	.:.:.:.:.:.:.	.:.:.:.:.:.:.	.:.:.:.:.:.:.	.:.:.:.:.:.:.	.:.:.:.:.:.:.	.:.:.:.:.:.:.	.:.:.:.:.:.:.	.:.:.:.:.:.:.
	3	2761576	C	A	synonymous variant|LOW	.:.:.:.:.:.:.	.:.:.:.:.:.:.	.:.:.:.:.:.:.	.:.:.:.:.:.:.	.:.:.:.:.:.:.	.:.:.:.:.:.:.	.:.:.:.:.:.:.	.:.:.:.:.:.:.	Present	Present	Present	Present	Present	Present	Present	.:.:.:.:.:.:.	.:.:.:.:.:.:.	.:.:.:.:.:.:.	Present	.:.:.:.:.:.:.	Present	.:.:.:.:.:.:.	.:.:.:.:.:.:.	.:.:.:.:.:.:.	.:.:.:.:.:.:.	.:.:.:.:.:.:.	.:.:.:.:.:.:.	.:.:.:.:.:.:.	.:.:.:.:.:.:.	.:.:.:.:.:.:.	.:.:.:.:.:.:.	.:.:.:.:.:.:.	.:.:.:.:.:.:.	.:.:.:.:.:.:.	.:.:.:.:.:.:.	.:.:.:.:.:.:.	.:.:.:.:.:.:.	.:.:.:.:.:.:.	.:.:.:.:.:.:.	.:.:.:.:.:.:.	.:.:.:.:.:.:.	.:.:.:.:.:.:.	.:.:.:.:.:.:.	.:.:.:.:.:.:.
	3	2761660	C	T	synonymous variant|LOW	.:.:.:.:.:.:.	.:.:.:.:.:.:.	.:.:.:.:.:.:.	.:.:.:.:.:.:.	.:.:.:.:.:.:.	.:.:.:.:.:.:.	.:.:.:.:.:.:.	.:.:.:.:.:.:.	Present	Present	Present	Present	Present	Present	Present	.:.:.:.:.:.:.	.:.:.:.:.:.:.	Present	Present	.:.:.:.:.:.:.	Present	.:.:.:.:.:.:.	.:.:.:.:.:.:.	.:.:.:.:.:.:.	.:.:.:.:.:.:.	.:.:.:.:.:.:.	.:.:.:.:.:.:.	.:.:.:.:.:.:.	.:.:.:.:.:.:.	.:.:.:.:.:.:.	.:.:.:.:.:.:.	.:.:.:.:.:.:.	.:.:.:.:.:.:.	.:.:.:.:.:.:.	.:.:.:.:.:.:.	.:.:.:.:.:.:.	.:.:.:.:.:.:.	.:.:.:.:.:.:.	.:.:.:.:.:.:.	.:.:.:.:.:.:.	.:.:.:.:.:.:.	.:.:.:.:.:.:.	.:.:.:.:.:.:.	.:.:.:.:.:.:.
	3	2762085	A	G	Intron	Present	Present	Present	Present	Present	Present	Present	Present	Present	Present	Present	Present	Present	Present	Present	.:.:.:.:.:.:.	.:.:.:.:.:.:.	.:.:.:.:.:.:.	Present	Present	Present	Present	Present	Present	Present	Present	Present	Present	Present	Present	Present	Present	Present	Present	Present	Present	Present	Present	Present	Present	Present	Present	Present	Present
	3	2762107	A	C	Intron	.:.:.:.:.:.:.	.:.:.:.:.:.:.	.:.:.:.:.:.:.	.:.:.:.:.:.:.	.:.:.:.:.:.:.	.:.:.:.:.:.:.	.:.:.:.:.:.:.	.:.:.:.:.:.:.	.:.:.:.:.:.:.	.:.:.:.:.:.:.	.:.:.:.:.:.:.	.:.:.:.:.:.:.	.:.:.:.:.:.:.	.:.:.:.:.:.:.	.:.:.:.:.:.:.	.:.:.:.:.:.:.	.:.:.:.:.:.:.	.:.:.:.:.:.:.	.:.:.:.:.:.:.	.:.:.:.:.:.:.	.:.:.:.:.:.:.	.:.:.:.:.:.:.	.:.:.:.:.:.:.	.:.:.:.:.:.:.	.:.:.:.:.:.:.	.:.:.:.:.:.:.	.:.:.:.:.:.:.	.:.:.:.:.:.:.	.:.:.:.:.:.:.	.:.:.:.:.:.:.	.:.:.:.:.:.:.	.:.:.:.:.:.:.	.:.:.:.:.:.:.	.:.:.:.:.:.:.	.:.:.:.:.:.:.	.:.:.:.:.:.:.	.:.:.:.:.:.:.	.:.:.:.:.:.:.	.:.:.:.:.:.:.	.:.:.:.:.:.:.	.:.:.:.:.:.:.	.:.:.:.:.:.:.	.:.:.:.:.:.:.	.:.:.:.:.:.:.
Erg6	4	1021269	C	T	synonymous variant|LOW	.:.:.:.:.:.:.	.:.:.:.:.:.:.	.:.:.:.:.:.:.	.:.:.:.:.:.:.	.:.:.:.:.:.:.	.:.:.:.:.:.:.	.:.:.:.:.:.:.	.:.:.:.:.:.:.	.:.:.:.:.:.:.	.:.:.:.:.:.:.	.:.:.:.:.:.:.	.:.:.:.:.:.:.	.:.:.:.:.:.:.	.:.:.:.:.:.:.	.:.:.:.:.:.:.	.:.:.:.:.:.:.	.:.:.:.:.:.:.	.:.:.:.:.:.:.	Present	.:.:.:.:.:.:.	.:.:.:.:.:.:.	.:.:.:.:.:.:.	.:.:.:.:.:.:.	.:.:.:.:.:.:.	.:.:.:.:.:.:.	.:.:.:.:.:.:.	.:.:.:.:.:.:.	.:.:.:.:.:.:.	.:.:.:.:.:.:.	.:.:.:.:.:.:.	.:.:.:.:.:.:.	.:.:.:.:.:.:.	.:.:.:.:.:.:.	.:.:.:.:.:.:.	.:.:.:.:.:.:.	.:.:.:.:.:.:.	.:.:.:.:.:.:.	.:.:.:.:.:.:.	.:.:.:.:.:.:.	.:.:.:.:.:.:.	.:.:.:.:.:.:.	.:.:.:.:.:.:.	.:.:.:.:.:.:.	.:.:.:.:.:.:.
	4	1021271	G	A	synonymous variant|LOW	.:.:.:.:.:.:.	.:.:.:.:.:.:.	.:.:.:.:.:.:.	.:.:.:.:.:.:.	.:.:.:.:.:.:.	.:.:.:.:.:.:.	.:.:.:.:.:.:.	.:.:.:.:.:.:.	.:.:.:.:.:.:.	.:.:.:.:.:.:.	.:.:.:.:.:.:.	.:.:.:.:.:.:.	.:.:.:.:.:.:.	.:.:.:.:.:.:.	.:.:.:.:.:.:.	.:.:.:.:.:.:.	.:.:.:.:.:.:.	.:.:.:.:.:.:.	.:.:.:.:.:.:.	.:.:.:.:.:.:.	.:.:.:.:.:.:.	.:.:.:.:.:.:.	.:.:.:.:.:.:.	.:.:.:.:.:.:.	.:.:.:.:.:.:.	.:.:.:.:.:.:.	.:.:.:.:.:.:.	.:.:.:.:.:.:.	.:.:.:.:.:.:.	.:.:.:.:.:.:.	.:.:.:.:.:.:.	.:.:.:.:.:.:.	.:.:.:.:.:.:.	Present	.:.:.:.:.:.:.	.:.:.:.:.:.:.	.:.:.:.:.:.:.	.:.:.:.:.:.:.	.:.:.:.:.:.:.	.:.:.:.:.:.:.	.:.:.:.:.:.:.	.:.:.:.:.:.:.	.:.:.:.:.:.:.	.:.:.:.:.:.:.
	4	1021488	A	G	synonymous variant|LOW	.:.:.:.:.:.:.	.:.:.:.:.:.:.	.:.:.:.:.:.:.	.:.:.:.:.:.:.	.:.:.:.:.:.:.	.:.:.:.:.:.:.	.:.:.:.:.:.:.	.:.:.:.:.:.:.	Present	Present	Present	Present	Present	Present	Present	.:.:.:.:.:.:.	.:.:.:.:.:.:.	Present	Present	.:.:.:.:.:.:.	Present	.:.:.:.:.:.:.	.:.:.:.:.:.:.	.:.:.:.:.:.:.	.:.:.:.:.:.:.	.:.:.:.:.:.:.	.:.:.:.:.:.:.	.:.:.:.:.:.:.	.:.:.:.:.:.:.	.:.:.:.:.:.:.	.:.:.:.:.:.:.	.:.:.:.:.:.:.	.:.:.:.:.:.:.	.:.:.:.:.:.:.	.:.:.:.:.:.:.	.:.:.:.:.:.:.	.:.:.:.:.:.:.	.:.:.:.:.:.:.	.:.:.:.:.:.:.	.:.:.:.:.:.:.	.:.:.:.:.:.:.	.:.:.:.:.:.:.	.:.:.:.:.:.:.	.:.:.:.:.:.:.
	4	1021536	G	A	synonymous variant|LOW	.:.:.:.:.:.:.	.:.:.:.:.:.:.	.:.:.:.:.:.:.	.:.:.:.:.:.:.	.:.:.:.:.:.:.	.:.:.:.:.:.:.	.:.:.:.:.:.:.	.:.:.:.:.:.:.	Present	Present	Present	Present	Present	Present	Present	.:.:.:.:.:.:.	.:.:.:.:.:.:.	Present	Present	.:.:.:.:.:.:.	Present	.:.:.:.:.:.:.	.:.:.:.:.:.:.	.:.:.:.:.:.:.	.:.:.:.:.:.:.	.:.:.:.:.:.:.	.:.:.:.:.:.:.	.:.:.:.:.:.:.	.:.:.:.:.:.:.	.:.:.:.:.:.:.	.:.:.:.:.:.:.	.:.:.:.:.:.:.	.:.:.:.:.:.:.	.:.:.:.:.:.:.	.:.:.:.:.:.:.	.:.:.:.:.:.:.	.:.:.:.:.:.:.	.:.:.:.:.:.:.	.:.:.:.:.:.:.	.:.:.:.:.:.:.	.:.:.:.:.:.:.	.:.:.:.:.:.:.	.:.:.:.:.:.:.	.:.:.:.:.:.:.
	4	1021666	A	C	missense variant|MODERATE|Phe -> Cys	.:.:.:.:.:.:.	.:.:.:.:.:.:.	.:.:.:.:.:.:.	.:.:.:.:.:.:.	.:.:.:.:.:.:.	Present	.:.:.:.:.:.:.	.:.:.:.:.:.:.	.:.:.:.:.:.:.	.:.:.:.:.:.:.	.:.:.:.:.:.:.	.:.:.:.:.:.:.	.:.:.:.:.:.:.	.:.:.:.:.:.:.	.:.:.:.:.:.:.	.:.:.:.:.:.:.	.:.:.:.:.:.:.	.:.:.:.:.:.:.	.:.:.:.:.:.:.	.:.:.:.:.:.:.	.:.:.:.:.:.:.	.:.:.:.:.:.:.	.:.:.:.:.:.:.	.:.:.:.:.:.:.	.:.:.:.:.:.:.	.:.:.:.:.:.:.	.:.:.:.:.:.:.	.:.:.:.:.:.:.	.:.:.:.:.:.:.	.:.:.:.:.:.:.	.:.:.:.:.:.:.	.:.:.:.:.:.:.	.:.:.:.:.:.:.	.:.:.:.:.:.:.	.:.:.:.:.:.:.	.:.:.:.:.:.:.	.:.:.:.:.:.:.	.:.:.:.:.:.:.	.:.:.:.:.:.:.	.:.:.:.:.:.:.	.:.:.:.:.:.:.	.:.:.:.:.:.:.	.:.:.:.:.:.:.	.:.:.:.:.:.:.
	4	1021917	T	A	Intron	.:.:.:.:.:.:.	.:.:.:.:.:.:.	.:.:.:.:.:.:.	.:.:.:.:.:.:.	.:.:.:.:.:.:.	.:.:.:.:.:.:.	.:.:.:.:.:.:.	.:.:.:.:.:.:.	Present	Present	Present	Present	Present	Present	Present	.:.:.:.:.:.:.	.:.:.:.:.:.:.	Present	Present	.:.:.:.:.:.:.	Present	.:.:.:.:.:.:.	.:.:.:.:.:.:.	.:.:.:.:.:.:.	.:.:.:.:.:.:.	.:.:.:.:.:.:.	.:.:.:.:.:.:.	.:.:.:.:.:.:.	.:.:.:.:.:.:.	.:.:.:.:.:.:.	.:.:.:.:.:.:.	.:.:.:.:.:.:.	.:.:.:.:.:.:.	.:.:.:.:.:.:.	.:.:.:.:.:.:.	.:.:.:.:.:.:.	.:.:.:.:.:.:.	.:.:.:.:.:.:.	.:.:.:.:.:.:.	.:.:.:.:.:.:.	.:.:.:.:.:.:.	.:.:.:.:.:.:.	.:.:.:.:.:.:.	.:.:.:.:.:.:.
	4	1021928	T	C	splice region variant&synonymous variant|LOW	.:.:.:.:.:.:.	.:.:.:.:.:.:.	.:.:.:.:.:.:.	.:.:.:.:.:.:.	.:.:.:.:.:.:.	.:.:.:.:.:.:.	.:.:.:.:.:.:.	.:.:.:.:.:.:.	.:.:.:.:.:.:.	.:.:.:.:.:.:.	.:.:.:.:.:.:.	.:.:.:.:.:.:.	.:.:.:.:.:.:.	.:.:.:.:.:.:.	.:.:.:.:.:.:.	.:.:.:.:.:.:.	.:.:.:.:.:.:.	Present	.:.:.:.:.:.:.	.:.:.:.:.:.:.	.:.:.:.:.:.:.	.:.:.:.:.:.:.	.:.:.:.:.:.:.	.:.:.:.:.:.:.	.:.:.:.:.:.:.	.:.:.:.:.:.:.	.:.:.:.:.:.:.	.:.:.:.:.:.:.	.:.:.:.:.:.:.	.:.:.:.:.:.:.	.:.:.:.:.:.:.	.:.:.:.:.:.:.	.:.:.:.:.:.:.	.:.:.:.:.:.:.	.:.:.:.:.:.:.	.:.:.:.:.:.:.	.:.:.:.:.:.:.	.:.:.:.:.:.:.	.:.:.:.:.:.:.	.:.:.:.:.:.:.	.:.:.:.:.:.:.	.:.:.:.:.:.:.	.:.:.:.:.:.:.	.:.:.:.:.:.:.
	4	1022029	C	A	missense variant&splice region variant|MODERATE|Ala -> Ser	.:.:.:.:.:.:.	.:.:.:.:.:.:.	.:.:.:.:.:.:.	.:.:.:.:.:.:.	.:.:.:.:.:.:.	.:.:.:.:.:.:.	.:.:.:.:.:.:.	.:.:.:.:.:.:.	.:.:.:.:.:.:.	.:.:.:.:.:.:.	.:.:.:.:.:.:.	.:.:.:.:.:.:.	.:.:.:.:.:.:.	.:.:.:.:.:.:.	.:.:.:.:.:.:.	.:.:.:.:.:.:.	.:.:.:.:.:.:.	.:.:.:.:.:.:.	.:.:.:.:.:.:.	.:.:.:.:.:.:.	.:.:.:.:.:.:.	.:.:.:.:.:.:.	.:.:.:.:.:.:.	.:.:.:.:.:.:.	.:.:.:.:.:.:.	.:.:.:.:.:.:.	.:.:.:.:.:.:.	.:.:.:.:.:.:.	.:.:.:.:.:.:.	.:.:.:.:.:.:.	.:.:.:.:.:.:.	.:.:.:.:.:.:.	.:.:.:.:.:.:.	.:.:.:.:.:.:.	.:.:.:.:.:.:.	.:.:.:.:.:.:.	.:.:.:.:.:.:.	Present	.:.:.:.:.:.:.	.:.:.:.:.:.:.	.:.:.:.:.:.:.	.:.:.:.:.:.:.	.:.:.:.:.:.:.	.:.:.:.:.:.:.
	4	1022107	C	A	missense variant|MODERATE|Ala -> Ser	.:.:.:.:.:.:.	.:.:.:.:.:.:.	.:.:.:.:.:.:.	.:.:.:.:.:.:.	.:.:.:.:.:.:.	.:.:.:.:.:.:.	.:.:.:.:.:.:.	.:.:.:.:.:.:.	.:.:.:.:.:.:.	.:.:.:.:.:.:.	.:.:.:.:.:.:.	.:.:.:.:.:.:.	.:.:.:.:.:.:.	.:.:.:.:.:.:.	.:.:.:.:.:.:.	.:.:.:.:.:.:.	.:.:.:.:.:.:.	.:.:.:.:.:.:.	.:.:.:.:.:.:.	.:.:.:.:.:.:.	.:.:.:.:.:.:.	.:.:.:.:.:.:.	Present	.:.:.:.:.:.:.	.:.:.:.:.:.:.	.:.:.:.:.:.:.	.:.:.:.:.:.:.	.:.:.:.:.:.:.	.:.:.:.:.:.:.	.:.:.:.:.:.:.	.:.:.:.:.:.:.	.:.:.:.:.:.:.	.:.:.:.:.:.:.	.:.:.:.:.:.:.	Present	.:.:.:.:.:.:.	.:.:.:.:.:.:.	.:.:.:.:.:.:.	.:.:.:.:.:.:.	.:.:.:.:.:.:.	.:.:.:.:.:.:.	.:.:.:.:.:.:.	.:.:.:.:.:.:.	.:.:.:.:.:.:.
Erg11	7	804537	A	T	synonymous variant|LOW	.:.:.:.:.:.:.	.:.:.:.:.:.:.	.:.:.:.:.:.:.	.:.:.:.:.:.:.	.:.:.:.:.:.:.	.:.:.:.:.:.:.	.:.:.:.:.:.:.	.:.:.:.:.:.:.	Present	Present	Present	Present	Present	Present	Present	.:.:.:.:.:.:.	.:.:.:.:.:.:.	Present	Present	.:.:.:.:.:.:.	Present	.:.:.:.:.:.:.	.:.:.:.:.:.:.	.:.:.:.:.:.:.	.:.:.:.:.:.:.	.:.:.:.:.:.:.	.:.:.:.:.:.:.	.:.:.:.:.:.:.	.:.:.:.:.:.:.	.:.:.:.:.:.:.	.:.:.:.:.:.:.	.:.:.:.:.:.:.	.:.:.:.:.:.:.	.:.:.:.:.:.:.	.:.:.:.:.:.:.	.:.:.:.:.:.:.	.:.:.:.:.:.:.	.:.:.:.:.:.:.	.:.:.:.:.:.:.	.:.:.:.:.:.:.	.:.:.:.:.:.:.	.:.:.:.:.:.:.	.:.:.:.:.:.:.	.:.:.:.:.:.:.
	7	804747	A	C	synonymous variant|LOW	Present	Present	Present	Present	Present	Present	Present	Present	Present	Present	Present	Present	Present	Present	Present	.:.:.:.:.:.:.	.:.:.:.:.:.:.	Present	Present	.:.:.:.:.:.:.	Present	Present	Present	Present	Present	Present	Present	Present	Present	Present	Present	Present	Present	.:.:.:.:.:.:.	Present	Present	Present	Present	Present	Present	Present	Present	.:.:.:.:.:.:.	Present
	7	805365	A	G	synonymous variant|LOW	.:.:.:.:.:.:.	.:.:.:.:.:.:.	.:.:.:.:.:.:.	.:.:.:.:.:.:.	.:.:.:.:.:.:.	.:.:.:.:.:.:.	.:.:.:.:.:.:.	.:.:.:.:.:.:.	.:.:.:.:.:.:.	.:.:.:.:.:.:.	.:.:.:.:.:.:.	.:.:.:.:.:.:.	.:.:.:.:.:.:.	.:.:.:.:.:.:.	.:.:.:.:.:.:.	.:.:.:.:.:.:.	.:.:.:.:.:.:.	Present	.:.:.:.:.:.:.	.:.:.:.:.:.:.	.:.:.:.:.:.:.	.:.:.:.:.:.:.	.:.:.:.:.:.:.	.:.:.:.:.:.:.	.:.:.:.:.:.:.	.:.:.:.:.:.:.	.:.:.:.:.:.:.	.:.:.:.:.:.:.	.:.:.:.:.:.:.	.:.:.:.:.:.:.	.:.:.:.:.:.:.	.:.:.:.:.:.:.	.:.:.:.:.:.:.	.:.:.:.:.:.:.	.:.:.:.:.:.:.	.:.:.:.:.:.:.	.:.:.:.:.:.:.	.:.:.:.:.:.:.	.:.:.:.:.:.:.	.:.:.:.:.:.:.	.:.:.:.:.:.:.	.:.:.:.:.:.:.	.:.:.:.:.:.:.	.:.:.:.:.:.:.
	7	805368	G	A	synonymous variant|LOW	.:.:.:.:.:.:.	.:.:.:.:.:.:.	.:.:.:.:.:.:.	.:.:.:.:.:.:.	.:.:.:.:.:.:.	.:.:.:.:.:.:.	.:.:.:.:.:.:.	.:.:.:.:.:.:.	.:.:.:.:.:.:.	.:.:.:.:.:.:.	.:.:.:.:.:.:.	.:.:.:.:.:.:.	.:.:.:.:.:.:.	.:.:.:.:.:.:.	.:.:.:.:.:.:.	.:.:.:.:.:.:.	.:.:.:.:.:.:.	.:.:.:.:.:.:.	.:.:.:.:.:.:.	.:.:.:.:.:.:.	.:.:.:.:.:.:.	.:.:.:.:.:.:.	.:.:.:.:.:.:.	.:.:.:.:.:.:.	.:.:.:.:.:.:.	.:.:.:.:.:.:.	.:.:.:.:.:.:.	.:.:.:.:.:.:.	.:.:.:.:.:.:.	.:.:.:.:.:.:.	.:.:.:.:.:.:.	Present	.:.:.:.:.:.:.	.:.:.:.:.:.:.	.:.:.:.:.:.:.	.:.:.:.:.:.:.	.:.:.:.:.:.:.	.:.:.:.:.:.:.	.:.:.:.:.:.:.	.:.:.:.:.:.:.	.:.:.:.:.:.:.	.:.:.:.:.:.:.	.:.:.:.:.:.:.	.:.:.:.:.:.:.
	7	805907	T	A	missense variant|MODERATE|Gln -> Leu	.:.:.:.:.:.:.	.:.:.:.:.:.:.	.:.:.:.:.:.:.	.:.:.:.:.:.:.	.:.:.:.:.:.:.	Present	.:.:.:.:.:.:.	.:.:.:.:.:.:.	.:.:.:.:.:.:.	.:.:.:.:.:.:.	.:.:.:.:.:.:.	.:.:.:.:.:.:.	.:.:.:.:.:.:.	.:.:.:.:.:.:.	.:.:.:.:.:.:.	.:.:.:.:.:.:.	.:.:.:.:.:.:.	.:.:.:.:.:.:.	.:.:.:.:.:.:.	.:.:.:.:.:.:.	.:.:.:.:.:.:.	.:.:.:.:.:.:.	.:.:.:.:.:.:.	.:.:.:.:.:.:.	.:.:.:.:.:.:.	.:.:.:.:.:.:.	.:.:.:.:.:.:.	.:.:.:.:.:.:.	.:.:.:.:.:.:.	.:.:.:.:.:.:.	.:.:.:.:.:.:.	Present	.:.:.:.:.:.:.	.:.:.:.:.:.:.	.:.:.:.:.:.:.	.:.:.:.:.:.:.	.:.:.:.:.:.:.	.:.:.:.:.:.:.	.:.:.:.:.:.:.	.:.:.:.:.:.:.	.:.:.:.:.:.:.	.:.:.:.:.:.:.	.:.:.:.:.:.:.	.:.:.:.:.:.:.
	7	805927	A	G	synonymous variant|LOW	.:.:.:.:.:.:.	.:.:.:.:.:.:.	.:.:.:.:.:.:.	.:.:.:.:.:.:.	.:.:.:.:.:.:.	.:.:.:.:.:.:.	.:.:.:.:.:.:.	.:.:.:.:.:.:.	.:.:.:.:.:.:.	.:.:.:.:.:.:.	.:.:.:.:.:.:.	.:.:.:.:.:.:.	.:.:.:.:.:.:.	.:.:.:.:.:.:.	.:.:.:.:.:.:.	.:.:.:.:.:.:.	.:.:.:.:.:.:.	.:.:.:.:.:.:.	.:.:.:.:.:.:.	.:.:.:.:.:.:.	.:.:.:.:.:.:.	.:.:.:.:.:.:.	.:.:.:.:.:.:.	.:.:.:.:.:.:.	.:.:.:.:.:.:.	Present	.:.:.:.:.:.:.	.:.:.:.:.:.:.	.:.:.:.:.:.:.	.:.:.:.:.:.:.	.:.:.:.:.:.:.	.:.:.:.:.:.:.	.:.:.:.:.:.:.	.:.:.:.:.:.:.	.:.:.:.:.:.:.	.:.:.:.:.:.:.	.:.:.:.:.:.:.	Present	Present	.:.:.:.:.:.:.	.:.:.:.:.:.:.	.:.:.:.:.:.:.	.:.:.:.:.:.:.	.:.:.:.:.:.:.
sod3	1	3887342	C	A	Intron	.:.:.:.:.:.:.	.:.:.:.:.:.:.	.:.:.:.:.:.:.	.:.:.:.:.:.:.	.:.:.:.:.:.:.	.:.:.:.:.:.:.	.:.:.:.:.:.:.	.:.:.:.:.:.:.	Present	Present	.:.:.:.:.:.:.	Present	Present	Present	Present	.:.:.:.:.:.:.	.:.:.:.:.:.:.	Present	Present	.:.:.:.:.:.:.	Present	.:.:.:.:.:.:.	.:.:.:.:.:.:.	.:.:.:.:.:.:.	.:.:.:.:.:.:.	.:.:.:.:.:.:.	.:.:.:.:.:.:.	.:.:.:.:.:.:.	.:.:.:.:.:.:.	.:.:.:.:.:.:.	.:.:.:.:.:.:.	.:.:.:.:.:.:.	.:.:.:.:.:.:.	.:.:.:.:.:.:.	.:.:.:.:.:.:.	.:.:.:.:.:.:.	.:.:.:.:.:.:.	.:.:.:.:.:.:.	.:.:.:.:.:.:.	.:.:.:.:.:.:.	.:.:.:.:.:.:.	.:.:.:.:.:.:.	.:.:.:.:.:.:.	.:.:.:.:.:.:.
	1	3887550	C	T	synonymous variant|LOW	.:.:.:.:.:.:.	Present	Present	Present	Present	.:.:.:.:.:.:.	.:.:.:.:.:.:.	.:.:.:.:.:.:.	.:.:.:.:.:.:.	.:.:.:.:.:.:.	.:.:.:.:.:.:.	.:.:.:.:.:.:.	.:.:.:.:.:.:.	.:.:.:.:.:.:.	.:.:.:.:.:.:.	.:.:.:.:.:.:.	.:.:.:.:.:.:.	.:.:.:.:.:.:.	.:.:.:.:.:.:.	.:.:.:.:.:.:.	.:.:.:.:.:.:.	Present	.:.:.:.:.:.:.	.:.:.:.:.:.:.	.:.:.:.:.:.:.	.:.:.:.:.:.:.	Present	Present	.:.:.:.:.:.:.	Present	.:.:.:.:.:.:.	.:.:.:.:.:.:.	.:.:.:.:.:.:.	.:.:.:.:.:.:.	.:.:.:.:.:.:.	.:.:.:.:.:.:.	.:.:.:.:.:.:.	.:.:.:.:.:.:.	.:.:.:.:.:.:.	.:.:.:.:.:.:.	.:.:.:.:.:.:.	.:.:.:.:.:.:.	.:.:.:.:.:.:.	.:.:.:.:.:.:.
	1	3887604	A	G	synonymous variant|LOW	.:.:.:.:.:.:.	.:.:.:.:.:.:.	.:.:.:.:.:.:.	.:.:.:.:.:.:.	.:.:.:.:.:.:.	.:.:.:.:.:.:.	.:.:.:.:.:.:.	.:.:.:.:.:.:.	.:.:.:.:.:.:.	.:.:.:.:.:.:.	.:.:.:.:.:.:.	.:.:.:.:.:.:.	.:.:.:.:.:.:.	.:.:.:.:.:.:.	.:.:.:.:.:.:.	.:.:.:.:.:.:.	.:.:.:.:.:.:.	.:.:.:.:.:.:.	.:.:.:.:.:.:.	.:.:.:.:.:.:.	.:.:.:.:.:.:.	Present	.:.:.:.:.:.:.	.:.:.:.:.:.:.	.:.:.:.:.:.:.	.:.:.:.:.:.:.	.:.:.:.:.:.:.	.:.:.:.:.:.:.	.:.:.:.:.:.:.	.:.:.:.:.:.:.	.:.:.:.:.:.:.	.:.:.:.:.:.:.	.:.:.:.:.:.:.	.:.:.:.:.:.:.	.:.:.:.:.:.:.	.:.:.:.:.:.:.	.:.:.:.:.:.:.	.:.:.:.:.:.:.	.:.:.:.:.:.:.	.:.:.:.:.:.:.	.:.:.:.:.:.:.	.:.:.:.:.:.:.	.:.:.:.:.:.:.	.:.:.:.:.:.:.
	1	3887718	C	T	synonymous variant|LOW	.:.:.:.:.:.:.	.:.:.:.:.:.:.	.:.:.:.:.:.:.	.:.:.:.:.:.:.	.:.:.:.:.:.:.	.:.:.:.:.:.:.	.:.:.:.:.:.:.	.:.:.:.:.:.:.	.:.:.:.:.:.:.	.:.:.:.:.:.:.	.:.:.:.:.:.:.	.:.:.:.:.:.:.	.:.:.:.:.:.:.	.:.:.:.:.:.:.	.:.:.:.:.:.:.	.:.:.:.:.:.:.	.:.:.:.:.:.:.	.:.:.:.:.:.:.	.:.:.:.:.:.:.	.:.:.:.:.:.:.	.:.:.:.:.:.:.	.:.:.:.:.:.:.	.:.:.:.:.:.:.	.:.:.:.:.:.:.	.:.:.:.:.:.:.	.:.:.:.:.:.:.	.:.:.:.:.:.:.	.:.:.:.:.:.:.	.:.:.:.:.:.:.	.:.:.:.:.:.:.	Present	Present	.:.:.:.:.:.:.	Present	.:.:.:.:.:.:.	.:.:.:.:.:.:.	.:.:.:.:.:.:.	.:.:.:.:.:.:.	.:.:.:.:.:.:.	.:.:.:.:.:.:.	.:.:.:.:.:.:.	.:.:.:.:.:.:.	.:.:.:.:.:.:.	.:.:.:.:.:.:.
cat1	3	563749	C	T	synonymous variant|LOW	.:.:.:.:.:.:.	Present	Present	Present	Present	.:.:.:.:.:.:.	.:.:.:.:.:.:.	.:.:.:.:.:.:.	.:.:.:.:.:.:.	.:.:.:.:.:.:.	.:.:.:.:.:.:.	.:.:.:.:.:.:.	.:.:.:.:.:.:.	.:.:.:.:.:.:.	.:.:.:.:.:.:.	.:.:.:.:.:.:.	.:.:.:.:.:.:.	.:.:.:.:.:.:.	.:.:.:.:.:.:.	Present	.:.:.:.:.:.:.	Present	.:.:.:.:.:.:.	.:.:.:.:.:.:.	.:.:.:.:.:.:.	Present	Present	Present	.:.:.:.:.:.:.	.:.:.:.:.:.:.	.:.:.:.:.:.:.	Present	.:.:.:.:.:.:.	.:.:.:.:.:.:.	Present	Present	.:.:.:.:.:.:.	.:.:.:.:.:.:.	.:.:.:.:.:.:.	.:.:.:.:.:.:.	.:.:.:.:.:.:.	Present	.:.:.:.:.:.:.	.:.:.:.:.:.:.
	3	563932	C	T	synonymous variant|LOW	Present	.:.:.:.:.:.:.	.:.:.:.:.:.:.	.:.:.:.:.:.:.	.:.:.:.:.:.:.	.:.:.:.:.:.:.	Present	Present	Present	Present	Present	Present	Present	Present	Present	.:.:.:.:.:.:.	.:.:.:.:.:.:.	Present	Present	.:.:.:.:.:.:.	Present	.:.:.:.:.:.:.	Present	Present	Present	.:.:.:.:.:.:.	.:.:.:.:.:.:.	.:.:.:.:.:.:.	.:.:.:.:.:.:.	Present	.:.:.:.:.:.:.	.:.:.:.:.:.:.	Present	.:.:.:.:.:.:.	.:.:.:.:.:.:.	.:.:.:.:.:.:.	Present	.:.:.:.:.:.:.	.:.:.:.:.:.:.	Present	.:.:.:.:.:.:.	.:.:.:.:.:.:.	.:.:.:.:.:.:.	.:.:.:.:.:.:.
	3	564002	A	T	missense variant|MODERATE|Ile -> Phe	.:.:.:.:.:.:.	.:.:.:.:.:.:.	.:.:.:.:.:.:.	.:.:.:.:.:.:.	.:.:.:.:.:.:.	.:.:.:.:.:.:.	.:.:.:.:.:.:.	.:.:.:.:.:.:.	.:.:.:.:.:.:.	Present	Present	.:.:.:.:.:.:.	Present	.:.:.:.:.:.:.	Present	.:.:.:.:.:.:.	.:.:.:.:.:.:.	.:.:.:.:.:.:.	.:.:.:.:.:.:.	.:.:.:.:.:.:.	.:.:.:.:.:.:.	.:.:.:.:.:.:.	.:.:.:.:.:.:.	.:.:.:.:.:.:.	.:.:.:.:.:.:.	.:.:.:.:.:.:.	.:.:.:.:.:.:.	.:.:.:.:.:.:.	.:.:.:.:.:.:.	.:.:.:.:.:.:.	.:.:.:.:.:.:.	.:.:.:.:.:.:.	.:.:.:.:.:.:.	.:.:.:.:.:.:.	.:.:.:.:.:.:.	.:.:.:.:.:.:.	.:.:.:.:.:.:.	.:.:.:.:.:.:.	.:.:.:.:.:.:.	.:.:.:.:.:.:.	.:.:.:.:.:.:.	.:.:.:.:.:.:.	.:.:.:.:.:.:.	.:.:.:.:.:.:.
	3	564085	T	C	synonymous variant|LOW	Present	Present	Present	Present	Present	.:.:.:.:.:.:.	Present	Present	Present	Present	Present	Present	Present	Present	Present	.:.:.:.:.:.:.	.:.:.:.:.:.:.	Present	Present	Present	Present	Present	Present	Present	Present	Present	Present	Present	.:.:.:.:.:.:.	Present	.:.:.:.:.:.:.	Present	Present	.:.:.:.:.:.:.	Present	Present	Present	.:.:.:.:.:.:.	.:.:.:.:.:.:.	Present	.:.:.:.:.:.:.	Present	.:.:.:.:.:.:.	.:.:.:.:.:.:.
	3	564142	G	C	missense_variant|MODERATE|Glu -> Asp	.:.:.:.:.:.:.	.:.:.:.:.:.:.	.:.:.:.:.:.:.	.:.:.:.:.:.:.	.:.:.:.:.:.:.	.:.:.:.:.:.:.	.:.:.:.:.:.:.	.:.:.:.:.:.:.	.:.:.:.:.:.:.	.:.:.:.:.:.:.	.:.:.:.:.:.:.	.:.:.:.:.:.:.	.:.:.:.:.:.:.	.:.:.:.:.:.:.	.:.:.:.:.:.:.	.:.:.:.:.:.:.	.:.:.:.:.:.:.	.:.:.:.:.:.:.	.:.:.:.:.:.:.	.:.:.:.:.:.:.	.:.:.:.:.:.:.	.:.:.:.:.:.:.	.:.:.:.:.:.:.	.:.:.:.:.:.:.	.:.:.:.:.:.:.	.:.:.:.:.:.:.	.:.:.:.:.:.:.	.:.:.:.:.:.:.	.:.:.:.:.:.:.	.:.:.:.:.:.:.	.:.:.:.:.:.:.	.:.:.:.:.:.:.	.:.:.:.:.:.:.	.:.:.:.:.:.:.	.:.:.:.:.:.:.	.:.:.:.:.:.:.	.:.:.:.:.:.:.	Present	.:.:.:.:.:.:.	.:.:.:.:.:.:.	.:.:.:.:.:.:.	.:.:.:.:.:.:.	.:.:.:.:.:.:.	.:.:.:.:.:.:.
	3	564189	C	T	Intron	.:.:.:.:.:.:.	.:.:.:.:.:.:.	.:.:.:.:.:.:.	.:.:.:.:.:.:.	.:.:.:.:.:.:.	.:.:.:.:.:.:.	.:.:.:.:.:.:.	.:.:.:.:.:.:.	.:.:.:.:.:.:.	.:.:.:.:.:.:.	.:.:.:.:.:.:.	.:.:.:.:.:.:.	.:.:.:.:.:.:.	.:.:.:.:.:.:.	.:.:.:.:.:.:.	Present	.:.:.:.:.:.:.	.:.:.:.:.:.:.	.:.:.:.:.:.:.	.:.:.:.:.:.:.	.:.:.:.:.:.:.	.:.:.:.:.:.:.	.:.:.:.:.:.:.	.:.:.:.:.:.:.	.:.:.:.:.:.:.	.:.:.:.:.:.:.	.:.:.:.:.:.:.	.:.:.:.:.:.:.	.:.:.:.:.:.:.	.:.:.:.:.:.:.	.:.:.:.:.:.:.	.:.:.:.:.:.:.	.:.:.:.:.:.:.	.:.:.:.:.:.:.	.:.:.:.:.:.:.	.:.:.:.:.:.:.	.:.:.:.:.:.:.	.:.:.:.:.:.:.	.:.:.:.:.:.:.	.:.:.:.:.:.:.	.:.:.:.:.:.:.	.:.:.:.:.:.:.	.:.:.:.:.:.:.	.:.:.:.:.:.:.
	3	564311	C	G	synonymous variant|LOW	Present	Present	Present	Present	Present	.:.:.:.:.:.:.	Present	Present	Present	Present	Present	Present	Present	Present	Present	.:.:.:.:.:.:.	.:.:.:.:.:.:.	Present	Present	Present	Present	Present	Present	Present	Present	Present	Present	Present	Present	Present	.:.:.:.:.:.:.	Present	Present	.:.:.:.:.:.:.	Present	Present	Present	.:.:.:.:.:.:.	.:.:.:.:.:.:.	Present	.:.:.:.:.:.:.	Present	.:.:.:.:.:.:.	.:.:.:.:.:.:.
	3	564640	C	T	Intron	Present	.:.:.:.:.:.:.	.:.:.:.:.:.:.	.:.:.:.:.:.:.	.:.:.:.:.:.:.	.:.:.:.:.:.:.	Present	Present	.:.:.:.:.:.:.	Present	Present	.:.:.:.:.:.:.	Present	.:.:.:.:.:.:.	Present	.:.:.:.:.:.:.	.:.:.:.:.:.:.	.:.:.:.:.:.:.	Present	.:.:.:.:.:.:.	.:.:.:.:.:.:.	.:.:.:.:.:.:.	Present	Present	Present	.:.:.:.:.:.:.	.:.:.:.:.:.:.	.:.:.:.:.:.:.	.:.:.:.:.:.:.	Present	.:.:.:.:.:.:.	.:.:.:.:.:.:.	Present	.:.:.:.:.:.:.	.:.:.:.:.:.:.	.:.:.:.:.:.:.	Present	.:.:.:.:.:.:.	.:.:.:.:.:.:.	Present	.:.:.:.:.:.:.	.:.:.:.:.:.:.	.:.:.:.:.:.:.	.:.:.:.:.:.:.
	3	564728	A	G	missense variant|MODERATE|Glu -> Gly	.:.:.:.:.:.:.	.:.:.:.:.:.:.	.:.:.:.:.:.:.	.:.:.:.:.:.:.	.:.:.:.:.:.:.	.:.:.:.:.:.:.	.:.:.:.:.:.:.	.:.:.:.:.:.:.	.:.:.:.:.:.:.	.:.:.:.:.:.:.	.:.:.:.:.:.:.	.:.:.:.:.:.:.	.:.:.:.:.:.:.	.:.:.:.:.:.:.	.:.:.:.:.:.:.	Present	.:.:.:.:.:.:.	.:.:.:.:.:.:.	.:.:.:.:.:.:.	.:.:.:.:.:.:.	.:.:.:.:.:.:.	.:.:.:.:.:.:.	.:.:.:.:.:.:.	.:.:.:.:.:.:.	.:.:.:.:.:.:.	.:.:.:.:.:.:.	.:.:.:.:.:.:.	.:.:.:.:.:.:.	.:.:.:.:.:.:.	.:.:.:.:.:.:.	.:.:.:.:.:.:.	.:.:.:.:.:.:.	.:.:.:.:.:.:.	.:.:.:.:.:.:.	.:.:.:.:.:.:.	.:.:.:.:.:.:.	.:.:.:.:.:.:.	.:.:.:.:.:.:.	.:.:.:.:.:.:.	.:.:.:.:.:.:.	.:.:.:.:.:.:.	.:.:.:.:.:.:.	.:.:.:.:.:.:.	.:.:.:.:.:.:.
	3	564894	A	G	Intron	Present	.:.:.:.:.:.:.	.:.:.:.:.:.:.	.:.:.:.:.:.:.	.:.:.:.:.:.:.	.:.:.:.:.:.:.	Present	Present	.:.:.:.:.:.:.	.:.:.:.:.:.:.	.:.:.:.:.:.:.	.:.:.:.:.:.:.	.:.:.:.:.:.:.	.:.:.:.:.:.:.	.:.:.:.:.:.:.	.:.:.:.:.:.:.	.:.:.:.:.:.:.	.:.:.:.:.:.:.	.:.:.:.:.:.:.	.:.:.:.:.:.:.	.:.:.:.:.:.:.	.:.:.:.:.:.:.	Present	Present	Present	.:.:.:.:.:.:.	.:.:.:.:.:.:.	.:.:.:.:.:.:.	.:.:.:.:.:.:.	Present	.:.:.:.:.:.:.	.:.:.:.:.:.:.	Present	.:.:.:.:.:.:.	.:.:.:.:.:.:.	.:.:.:.:.:.:.	Present	.:.:.:.:.:.:.	.:.:.:.:.:.:.	Present	.:.:.:.:.:.:.	.:.:.:.:.:.:.	.:.:.:.:.:.:.	.:.:.:.:.:.:.
	3	565117	T	C	Intron	.:.:.:.:.:.:.	.:.:.:.:.:.:.	.:.:.:.:.:.:.	.:.:.:.:.:.:.	.:.:.:.:.:.:.	Present	.:.:.:.:.:.:.	.:.:.:.:.:.:.	.:.:.:.:.:.:.	.:.:.:.:.:.:.	.:.:.:.:.:.:.	.:.:.:.:.:.:.	.:.:.:.:.:.:.	.:.:.:.:.:.:.	.:.:.:.:.:.:.	.:.:.:.:.:.:.	.:.:.:.:.:.:.	.:.:.:.:.:.:.	.:.:.:.:.:.:.	.:.:.:.:.:.:.	.:.:.:.:.:.:.	.:.:.:.:.:.:.	.:.:.:.:.:.:.	.:.:.:.:.:.:.	.:.:.:.:.:.:.	.:.:.:.:.:.:.	.:.:.:.:.:.:.	.:.:.:.:.:.:.	.:.:.:.:.:.:.	.:.:.:.:.:.:.	.:.:.:.:.:.:.	.:.:.:.:.:.:.	.:.:.:.:.:.:.	.:.:.:.:.:.:.	.:.:.:.:.:.:.	.:.:.:.:.:.:.	.:.:.:.:.:.:.	.:.:.:.:.:.:.	.:.:.:.:.:.:.	.:.:.:.:.:.:.	.:.:.:.:.:.:.	.:.:.:.:.:.:.	.:.:.:.:.:.:.	.:.:.:.:.:.:.
	3	565121	G	T	Intron	Present	.:.:.:.:.:.:.	.:.:.:.:.:.:.	.:.:.:.:.:.:.	.:.:.:.:.:.:.	.:.:.:.:.:.:.	Present	Present	Present	Present	Present	Present	Present	Present	Present	.:.:.:.:.:.:.	.:.:.:.:.:.:.	Present	Present	.:.:.:.:.:.:.	Present	.:.:.:.:.:.:.	Present	Present	Present	.:.:.:.:.:.:.	.:.:.:.:.:.:.	.:.:.:.:.:.:.	.:.:.:.:.:.:.	Present	.:.:.:.:.:.:.	.:.:.:.:.:.:.	Present	.:.:.:.:.:.:.	.:.:.:.:.:.:.	.:.:.:.:.:.:.	Present	.:.:.:.:.:.:.	.:.:.:.:.:.:.	Present	.:.:.:.:.:.:.	.:.:.:.:.:.:.	.:.:.:.:.:.:.	.:.:.:.:.:.:.
	3	565143	T	G	Intron	.:.:.:.:.:.:.	.:.:.:.:.:.:.	.:.:.:.:.:.:.	.:.:.:.:.:.:.	.:.:.:.:.:.:.	.:.:.:.:.:.:.	.:.:.:.:.:.:.	.:.:.:.:.:.:.	.:.:.:.:.:.:.	Present	Present	.:.:.:.:.:.:.	Present	.:.:.:.:.:.:.	Present	.:.:.:.:.:.:.	.:.:.:.:.:.:.	.:.:.:.:.:.:.	Present	.:.:.:.:.:.:.	.:.:.:.:.:.:.	.:.:.:.:.:.:.	.:.:.:.:.:.:.	.:.:.:.:.:.:.	.:.:.:.:.:.:.	.:.:.:.:.:.:.	.:.:.:.:.:.:.	.:.:.:.:.:.:.	.:.:.:.:.:.:.	.:.:.:.:.:.:.	.:.:.:.:.:.:.	.:.:.:.:.:.:.	.:.:.:.:.:.:.	.:.:.:.:.:.:.	.:.:.:.:.:.:.	.:.:.:.:.:.:.	.:.:.:.:.:.:.	.:.:.:.:.:.:.	.:.:.:.:.:.:.	.:.:.:.:.:.:.	.:.:.:.:.:.:.	.:.:.:.:.:.:.	.:.:.:.:.:.:.	.:.:.:.:.:.:.
	3	565207	C	A	synonymous variant|LOW	Present	.:.:.:.:.:.:.	.:.:.:.:.:.:.	.:.:.:.:.:.:.	.:.:.:.:.:.:.	.:.:.:.:.:.:.	Present	Present	.:.:.:.:.:.:.	.:.:.:.:.:.:.	.:.:.:.:.:.:.	.:.:.:.:.:.:.	.:.:.:.:.:.:.	.:.:.:.:.:.:.	.:.:.:.:.:.:.	.:.:.:.:.:.:.	.:.:.:.:.:.:.	.:.:.:.:.:.:.	.:.:.:.:.:.:.	.:.:.:.:.:.:.	.:.:.:.:.:.:.	.:.:.:.:.:.:.	Present	Present	Present	.:.:.:.:.:.:.	.:.:.:.:.:.:.	.:.:.:.:.:.:.	.:.:.:.:.:.:.	Present	.:.:.:.:.:.:.	.:.:.:.:.:.:.	Present	.:.:.:.:.:.:.	.:.:.:.:.:.:.	.:.:.:.:.:.:.	Present	.:.:.:.:.:.:.	.:.:.:.:.:.:.	Present	.:.:.:.:.:.:.	.:.:.:.:.:.:.	.:.:.:.:.:.:.	.:.:.:.:.:.:.
	3	565429	G	A	synonymous variant|LOW	.:.:.:.:.:.:.	Present	Present	Present	Present	.:.:.:.:.:.:.	.:.:.:.:.:.:.	.:.:.:.:.:.:.	.:.:.:.:.:.:.	.:.:.:.:.:.:.	.:.:.:.:.:.:.	.:.:.:.:.:.:.	.:.:.:.:.:.:.	.:.:.:.:.:.:.	.:.:.:.:.:.:.	.:.:.:.:.:.:.	.:.:.:.:.:.:.	.:.:.:.:.:.:.	.:.:.:.:.:.:.	Present	.:.:.:.:.:.:.	Present	.:.:.:.:.:.:.	.:.:.:.:.:.:.	.:.:.:.:.:.:.	Present	Present	Present	.:.:.:.:.:.:.	.:.:.:.:.:.:.	.:.:.:.:.:.:.	Present	.:.:.:.:.:.:.	.:.:.:.:.:.:.	Present	.:.:.:.:.:.:.	.:.:.:.:.:.:.	.:.:.:.:.:.:.	.:.:.:.:.:.:.	.:.:.:.:.:.:.	.:.:.:.:.:.:.	Present	.:.:.:.:.:.:.	.:.:.:.:.:.:.
	3	565459	C	G	synonymous variant|LOW	.:.:.:.:.:.:.	.:.:.:.:.:.:.	.:.:.:.:.:.:.	.:.:.:.:.:.:.	.:.:.:.:.:.:.	.:.:.:.:.:.:.	.:.:.:.:.:.:.	.:.:.:.:.:.:.	.:.:.:.:.:.:.	.:.:.:.:.:.:.	.:.:.:.:.:.:.	.:.:.:.:.:.:.	.:.:.:.:.:.:.	.:.:.:.:.:.:.	.:.:.:.:.:.:.	.:.:.:.:.:.:.	.:.:.:.:.:.:.	.:.:.:.:.:.:.	.:.:.:.:.:.:.	.:.:.:.:.:.:.	.:.:.:.:.:.:.	Present	.:.:.:.:.:.:.	.:.:.:.:.:.:.	.:.:.:.:.:.:.	Present	.:.:.:.:.:.:.	.:.:.:.:.:.:.	.:.:.:.:.:.:.	.:.:.:.:.:.:.	.:.:.:.:.:.:.	.:.:.:.:.:.:.	.:.:.:.:.:.:.	.:.:.:.:.:.:.	.:.:.:.:.:.:.	.:.:.:.:.:.:.	.:.:.:.:.:.:.	.:.:.:.:.:.:.	.:.:.:.:.:.:.	.:.:.:.:.:.:.	.:.:.:.:.:.:.	.:.:.:.:.:.:.	.:.:.:.:.:.:.	.:.:.:.:.:.:.
	3	565823	T	C	missense variant|MODERATE|Ser -> Pro	.:.:.:.:.:.:.	.:.:.:.:.:.:.	.:.:.:.:.:.:.	.:.:.:.:.:.:.	.:.:.:.:.:.:.	.:.:.:.:.:.:.	.:.:.:.:.:.:.	.:.:.:.:.:.:.	.:.:.:.:.:.:.	.:.:.:.:.:.:.	.:.:.:.:.:.:.	.:.:.:.:.:.:.	.:.:.:.:.:.:.	.:.:.:.:.:.:.	.:.:.:.:.:.:.	.:.:.:.:.:.:.	.:.:.:.:.:.:.	.:.:.:.:.:.:.	.:.:.:.:.:.:.	.:.:.:.:.:.:.	.:.:.:.:.:.:.	.:.:.:.:.:.:.	.:.:.:.:.:.:.	.:.:.:.:.:.:.	.:.:.:.:.:.:.	.:.:.:.:.:.:.	.:.:.:.:.:.:.	.:.:.:.:.:.:.	.:.:.:.:.:.:.	.:.:.:.:.:.:.	.:.:.:.:.:.:.	Present	.:.:.:.:.:.:.	.:.:.:.:.:.:.	.:.:.:.:.:.:.	.:.:.:.:.:.:.	.:.:.:.:.:.:.	.:.:.:.:.:.:.	.:.:.:.:.:.:.	.:.:.:.:.:.:.	.:.:.:.:.:.:.	.:.:.:.:.:.:.	.:.:.:.:.:.:.	.:.:.:.:.:.:.
	3	565874	C	T	synonymous variant|LOW	.:.:.:.:.:.:.	.:.:.:.:.:.:.	.:.:.:.:.:.:.	.:.:.:.:.:.:.	.:.:.:.:.:.:.	.:.:.:.:.:.:.	.:.:.:.:.:.:.	.:.:.:.:.:.:.	.:.:.:.:.:.:.	Present	Present	.:.:.:.:.:.:.	Present	.:.:.:.:.:.:.	Present	.:.:.:.:.:.:.	.:.:.:.:.:.:.	Present	Present	.:.:.:.:.:.:.	.:.:.:.:.:.:.	.:.:.:.:.:.:.	.:.:.:.:.:.:.	.:.:.:.:.:.:.	.:.:.:.:.:.:.	.:.:.:.:.:.:.	.:.:.:.:.:.:.	.:.:.:.:.:.:.	.:.:.:.:.:.:.	.:.:.:.:.:.:.	.:.:.:.:.:.:.	.:.:.:.:.:.:.	.:.:.:.:.:.:.	.:.:.:.:.:.:.	.:.:.:.:.:.:.	.:.:.:.:.:.:.	.:.:.:.:.:.:.	.:.:.:.:.:.:.	.:.:.:.:.:.:.	.:.:.:.:.:.:.	.:.:.:.:.:.:.	.:.:.:.:.:.:.	.:.:.:.:.:.:.	.:.:.:.:.:.:.
	3	566021	C	A	missense_variant|MODERATE|Leu -> Ile	.:.:.:.:.:.:.	.:.:.:.:.:.:.	.:.:.:.:.:.:.	.:.:.:.:.:.:.	.:.:.:.:.:.:.	.:.:.:.:.:.:.	.:.:.:.:.:.:.	.:.:.:.:.:.:.	Present	Present	Present	Present	Present	Present	Present	.:.:.:.:.:.:.	.:.:.:.:.:.:.	Present	Present	.:.:.:.:.:.:.	Present	.:.:.:.:.:.:.	.:.:.:.:.:.:.	.:.:.:.:.:.:.	.:.:.:.:.:.:.	.:.:.:.:.:.:.	.:.:.:.:.:.:.	.:.:.:.:.:.:.	.:.:.:.:.:.:.	.:.:.:.:.:.:.	.:.:.:.:.:.:.	.:.:.:.:.:.:.	.:.:.:.:.:.:.	.:.:.:.:.:.:.	.:.:.:.:.:.:.	.:.:.:.:.:.:.	.:.:.:.:.:.:.	.:.:.:.:.:.:.	.:.:.:.:.:.:.	.:.:.:.:.:.:.	.:.:.:.:.:.:.	.:.:.:.:.:.:.	.:.:.:.:.:.:.	.:.:.:.:.:.:.
sod2	4	3056910	A	T	Intron	.:.:.:.:.:.:.	.:.:.:.:.:.:.	.:.:.:.:.:.:.	.:.:.:.:.:.:.	.:.:.:.:.:.:.	Present	.:.:.:.:.:.:.	.:.:.:.:.:.:.	.:.:.:.:.:.:.	.:.:.:.:.:.:.	.:.:.:.:.:.:.	.:.:.:.:.:.:.	.:.:.:.:.:.:.	.:.:.:.:.:.:.	.:.:.:.:.:.:.	.:.:.:.:.:.:.	.:.:.:.:.:.:.	.:.:.:.:.:.:.	.:.:.:.:.:.:.	.:.:.:.:.:.:.	.:.:.:.:.:.:.	.:.:.:.:.:.:.	.:.:.:.:.:.:.	.:.:.:.:.:.:.	.:.:.:.:.:.:.	.:.:.:.:.:.:.	.:.:.:.:.:.:.	.:.:.:.:.:.:.	.:.:.:.:.:.:.	.:.:.:.:.:.:.	.:.:.:.:.:.:.	.:.:.:.:.:.:.	.:.:.:.:.:.:.	.:.:.:.:.:.:.	.:.:.:.:.:.:.	.:.:.:.:.:.:.	.:.:.:.:.:.:.	.:.:.:.:.:.:.	.:.:.:.:.:.:.	.:.:.:.:.:.:.	.:.:.:.:.:.:.	.:.:.:.:.:.:.	.:.:.:.:.:.:.	.:.:.:.:.:.:.
	4	3056953	C	T	Intron	.:.:.:.:.:.:.	.:.:.:.:.:.:.	.:.:.:.:.:.:.	.:.:.:.:.:.:.	.:.:.:.:.:.:.	.:.:.:.:.:.:.	.:.:.:.:.:.:.	.:.:.:.:.:.:.	.:.:.:.:.:.:.	.:.:.:.:.:.:.	.:.:.:.:.:.:.	.:.:.:.:.:.:.	.:.:.:.:.:.:.	.:.:.:.:.:.:.	.:.:.:.:.:.:.	.:.:.:.:.:.:.	.:.:.:.:.:.:.	.:.:.:.:.:.:.	.:.:.:.:.:.:.	Present	.:.:.:.:.:.:.	.:.:.:.:.:.:.	.:.:.:.:.:.:.	.:.:.:.:.:.:.	.:.:.:.:.:.:.	.:.:.:.:.:.:.	.:.:.:.:.:.:.	.:.:.:.:.:.:.	.:.:.:.:.:.:.	.:.:.:.:.:.:.	.:.:.:.:.:.:.	Present	.:.:.:.:.:.:.	.:.:.:.:.:.:.	.:.:.:.:.:.:.	.:.:.:.:.:.:.	.:.:.:.:.:.:.	.:.:.:.:.:.:.	Present	.:.:.:.:.:.:.	.:.:.:.:.:.:.	.:.:.:.:.:.:.	Present	.:.:.:.:.:.:.
	4	3056972	G	C	Intron	Present	Present	Present	Present	Present	Present	Present	Present	Present	Present	Present	Present	Present	Present	Present	Present	Present	Present	Present	Present	Present	Present	Present	Present	Present	Present	Present	Present	Present	Present	Present	Present	Present	Present	Present	Present	Present	Present	Present	Present	Present	Present	Present	Present
	4	3056995	G	A	Intron	.:.:.:.:.:.:.	.:.:.:.:.:.:.	.:.:.:.:.:.:.	.:.:.:.:.:.:.	.:.:.:.:.:.:.	Present	.:.:.:.:.:.:.	.:.:.:.:.:.:.	.:.:.:.:.:.:.	.:.:.:.:.:.:.	.:.:.:.:.:.:.	.:.:.:.:.:.:.	.:.:.:.:.:.:.	.:.:.:.:.:.:.	.:.:.:.:.:.:.	.:.:.:.:.:.:.	.:.:.:.:.:.:.	.:.:.:.:.:.:.	.:.:.:.:.:.:.	.:.:.:.:.:.:.	.:.:.:.:.:.:.	.:.:.:.:.:.:.	.:.:.:.:.:.:.	.:.:.:.:.:.:.	.:.:.:.:.:.:.	.:.:.:.:.:.:.	.:.:.:.:.:.:.	.:.:.:.:.:.:.	.:.:.:.:.:.:.	.:.:.:.:.:.:.	.:.:.:.:.:.:.	.:.:.:.:.:.:.	.:.:.:.:.:.:.	.:.:.:.:.:.:.	.:.:.:.:.:.:.	.:.:.:.:.:.:.	.:.:.:.:.:.:.	.:.:.:.:.:.:.	.:.:.:.:.:.:.	.:.:.:.:.:.:.	.:.:.:.:.:.:.	.:.:.:.:.:.:.	.:.:.:.:.:.:.	.:.:.:.:.:.:.
	4	3057317	T	C	synonymous variant|LOW	.:.:.:.:.:.:.	.:.:.:.:.:.:.	.:.:.:.:.:.:.	.:.:.:.:.:.:.	.:.:.:.:.:.:.	.:.:.:.:.:.:.	.:.:.:.:.:.:.	.:.:.:.:.:.:.	Present	Present	Present	Present	Present	Present	Present	Present	.:.:.:.:.:.:.	Present	Present	.:.:.:.:.:.:.	Present	.:.:.:.:.:.:.	.:.:.:.:.:.:.	.:.:.:.:.:.:.	.:.:.:.:.:.:.	.:.:.:.:.:.:.	.:.:.:.:.:.:.	.:.:.:.:.:.:.	.:.:.:.:.:.:.	.:.:.:.:.:.:.	.:.:.:.:.:.:.	.:.:.:.:.:.:.	.:.:.:.:.:.:.	.:.:.:.:.:.:.	.:.:.:.:.:.:.	.:.:.:.:.:.:.	.:.:.:.:.:.:.	.:.:.:.:.:.:.	.:.:.:.:.:.:.	.:.:.:.:.:.:.	.:.:.:.:.:.:.	.:.:.:.:.:.:.	.:.:.:.:.:.:.	.:.:.:.:.:.:.
sod1	5	2379914	T	G	Intron	.:.:.:.:.:.:.	.:.:.:.:.:.:.	.:.:.:.:.:.:.	.:.:.:.:.:.:.	.:.:.:.:.:.:.	Present	.:.:.:.:.:.:.	.:.:.:.:.:.:.	Present	Present	Present	Present	Present	Present	Present	.:.:.:.:.:.:.	.:.:.:.:.:.:.	Present	Present	Present	Present	.:.:.:.:.:.:.	.:.:.:.:.:.:.	.:.:.:.:.:.:.	.:.:.:.:.:.:.	.:.:.:.:.:.:.	.:.:.:.:.:.:.	.:.:.:.:.:.:.	.:.:.:.:.:.:.	.:.:.:.:.:.:.	Present	Present	.:.:.:.:.:.:.	Present	.:.:.:.:.:.:.	.:.:.:.:.:.:.	.:.:.:.:.:.:.	Present	Present	.:.:.:.:.:.:.	.:.:.:.:.:.:.	.:.:.:.:.:.:.	Present	.:.:.:.:.:.:.
catA	6	857282	G	T	synonymous variant|LOW	.:.:.:.:.:.:.	.:.:.:.:.:.:.	.:.:.:.:.:.:.	.:.:.:.:.:.:.	.:.:.:.:.:.:.	.:.:.:.:.:.:.	.:.:.:.:.:.:.	.:.:.:.:.:.:.	Present	Present	Present	Present	Present	Present	Present	.:.:.:.:.:.:.	.:.:.:.:.:.:.	Present	Present	.:.:.:.:.:.:.	Present	.:.:.:.:.:.:.	.:.:.:.:.:.:.	.:.:.:.:.:.:.	.:.:.:.:.:.:.	.:.:.:.:.:.:.	.:.:.:.:.:.:.	.:.:.:.:.:.:.	.:.:.:.:.:.:.	.:.:.:.:.:.:.	.:.:.:.:.:.:.	.:.:.:.:.:.:.	.:.:.:.:.:.:.	.:.:.:.:.:.:.	.:.:.:.:.:.:.	.:.:.:.:.:.:.	.:.:.:.:.:.:.	.:.:.:.:.:.:.	.:.:.:.:.:.:.	.:.:.:.:.:.:.	.:.:.:.:.:.:.	.:.:.:.:.:.:.	.:.:.:.:.:.:.	.:.:.:.:.:.:.
	6	857360	A	G	synonymous variant|LOW	.:.:.:.:.:.:.	.:.:.:.:.:.:.	.:.:.:.:.:.:.	.:.:.:.:.:.:.	.:.:.:.:.:.:.	.:.:.:.:.:.:.	.:.:.:.:.:.:.	.:.:.:.:.:.:.	.:.:.:.:.:.:.	.:.:.:.:.:.:.	.:.:.:.:.:.:.	.:.:.:.:.:.:.	.:.:.:.:.:.:.	.:.:.:.:.:.:.	.:.:.:.:.:.:.	.:.:.:.:.:.:.	.:.:.:.:.:.:.	Present	.:.:.:.:.:.:.	.:.:.:.:.:.:.	.:.:.:.:.:.:.	.:.:.:.:.:.:.	.:.:.:.:.:.:.	.:.:.:.:.:.:.	.:.:.:.:.:.:.	.:.:.:.:.:.:.	.:.:.:.:.:.:.	.:.:.:.:.:.:.	.:.:.:.:.:.:.	.:.:.:.:.:.:.	.:.:.:.:.:.:.	.:.:.:.:.:.:.	.:.:.:.:.:.:.	.:.:.:.:.:.:.	.:.:.:.:.:.:.	.:.:.:.:.:.:.	.:.:.:.:.:.:.	.:.:.:.:.:.:.	.:.:.:.:.:.:.	.:.:.:.:.:.:.	.:.:.:.:.:.:.	.:.:.:.:.:.:.	.:.:.:.:.:.:.	.:.:.:.:.:.:.
	6	857630	A	T	missense variant|MODERATE|Met -> Leu	.:.:.:.:.:.:.	.:.:.:.:.:.:.	.:.:.:.:.:.:.	.:.:.:.:.:.:.	.:.:.:.:.:.:.	.:.:.:.:.:.:.	.:.:.:.:.:.:.	.:.:.:.:.:.:.	.:.:.:.:.:.:.	.:.:.:.:.:.:.	.:.:.:.:.:.:.	.:.:.:.:.:.:.	.:.:.:.:.:.:.	.:.:.:.:.:.:.	.:.:.:.:.:.:.	.:.:.:.:.:.:.	1:34:0:0:34:1158:-104.514,0	.:.:.:.:.:.:.	.:.:.:.:.:.:.	.:.:.:.:.:.:.	.:.:.:.:.:.:.	.:.:.:.:.:.:.	.:.:.:.:.:.:.	.:.:.:.:.:.:.	.:.:.:.:.:.:.	.:.:.:.:.:.:.	.:.:.:.:.:.:.	.:.:.:.:.:.:.	.:.:.:.:.:.:.	.:.:.:.:.:.:.	.:.:.:.:.:.:.	.:.:.:.:.:.:.	.:.:.:.:.:.:.	.:.:.:.:.:.:.	.:.:.:.:.:.:.	.:.:.:.:.:.:.	.:.:.:.:.:.:.	.:.:.:.:.:.:.	.:.:.:.:.:.:.	.:.:.:.:.:.:.	.:.:.:.:.:.:.	.:.:.:.:.:.:.	.:.:.:.:.:.:.	.:.:.:.:.:.:.
	6	857783	G	A	missense variant|MODERATE|Val -> Met	.:.:.:.:.:.:.	.:.:.:.:.:.:.	.:.:.:.:.:.:.	.:.:.:.:.:.:.	.:.:.:.:.:.:.	.:.:.:.:.:.:.	.:.:.:.:.:.:.	.:.:.:.:.:.:.	.:.:.:.:.:.:.	.:.:.:.:.:.:.	.:.:.:.:.:.:.	.:.:.:.:.:.:.	.:.:.:.:.:.:.	.:.:.:.:.:.:.	.:.:.:.:.:.:.	.:.:.:.:.:.:.	.:.:.:.:.:.:.	.:.:.:.:.:.:.	.:.:.:.:.:.:.	.:.:.:.:.:.:.	.:.:.:.:.:.:.	.:.:.:.:.:.:.	.:.:.:.:.:.:.	.:.:.:.:.:.:.	.:.:.:.:.:.:.	.:.:.:.:.:.:.	.:.:.:.:.:.:.	.:.:.:.:.:.:.	.:.:.:.:.:.:.	.:.:.:.:.:.:.	.:.:.:.:.:.:.	.:.:.:.:.:.:.	.:.:.:.:.:.:.	.:.:.:.:.:.:.	.:.:.:.:.:.:.	.:.:.:.:.:.:.	.:.:.:.:.:.:.	.:.:.:.:.:.:.	.:.:.:.:.:.:.	.:.:.:.:.:.:.	.:.:.:.:.:.:.	.:.:.:.:.:.:.	.:.:.:.:.:.:.	.:.:.:.:.:.:.
	6	857963	G	A	missense variant|MODERATE|Asp -> Asn	.:.:.:.:.:.:.	.:.:.:.:.:.:.	.:.:.:.:.:.:.	.:.:.:.:.:.:.	.:.:.:.:.:.:.	.:.:.:.:.:.:.	.:.:.:.:.:.:.	.:.:.:.:.:.:.	.:.:.:.:.:.:.	.:.:.:.:.:.:.	.:.:.:.:.:.:.	.:.:.:.:.:.:.	.:.:.:.:.:.:.	.:.:.:.:.:.:.	.:.:.:.:.:.:.	.:.:.:.:.:.:.	.:.:.:.:.:.:.	.:.:.:.:.:.:.	.:.:.:.:.:.:.	.:.:.:.:.:.:.	.:.:.:.:.:.:.	.:.:.:.:.:.:.	.:.:.:.:.:.:.	.:.:.:.:.:.:.	.:.:.:.:.:.:.	.:.:.:.:.:.:.	.:.:.:.:.:.:.	.:.:.:.:.:.:.	.:.:.:.:.:.:.	.:.:.:.:.:.:.	.:.:.:.:.:.:.	Present	.:.:.:.:.:.:.	Present	.:.:.:.:.:.:.	.:.:.:.:.:.:.	.:.:.:.:.:.:.	.:.:.:.:.:.:.	.:.:.:.:.:.:.	.:.:.:.:.:.:.	.:.:.:.:.:.:.	.:.:.:.:.:.:.	.:.:.:.:.:.:.	.:.:.:.:.:.:.
	6	858124	C	T	synonymous variant|LOW	Present	.:.:.:.:.:.:.	.:.:.:.:.:.:.	.:.:.:.:.:.:.	.:.:.:.:.:.:.	.:.:.:.:.:.:.	Present	Present	.:.:.:.:.:.:.	.:.:.:.:.:.:.	.:.:.:.:.:.:.	.:.:.:.:.:.:.	.:.:.:.:.:.:.	.:.:.:.:.:.:.	.:.:.:.:.:.:.	.:.:.:.:.:.:.	.:.:.:.:.:.:.	.:.:.:.:.:.:.	.:.:.:.:.:.:.	Present	.:.:.:.:.:.:.	Present	Present	Present	Present	Present	.:.:.:.:.:.:.	.:.:.:.:.:.:.	.:.:.:.:.:.:.	.:.:.:.:.:.:.	.:.:.:.:.:.:.	.:.:.:.:.:.:.	Present	.:.:.:.:.:.:.	.:.:.:.:.:.:.	Present	Present	Present	.:.:.:.:.:.:.	.:.:.:.:.:.:.	.:.:.:.:.:.:.	Present	Present	Present
	6	858364	C	T	synonymous variant|LOW	.:.:.:.:.:.:.	.:.:.:.:.:.:.	.:.:.:.:.:.:.	.:.:.:.:.:.:.	.:.:.:.:.:.:.	.:.:.:.:.:.:.	.:.:.:.:.:.:.	.:.:.:.:.:.:.	Present	Present	Present	Present	Present	Present	Present	.:.:.:.:.:.:.	.:.:.:.:.:.:.	Present	Present	.:.:.:.:.:.:.	Present	.:.:.:.:.:.:.	.:.:.:.:.:.:.	.:.:.:.:.:.:.	.:.:.:.:.:.:.	.:.:.:.:.:.:.	.:.:.:.:.:.:.	.:.:.:.:.:.:.	.:.:.:.:.:.:.	.:.:.:.:.:.:.	.:.:.:.:.:.:.	.:.:.:.:.:.:.	.:.:.:.:.:.:.	.:.:.:.:.:.:.	.:.:.:.:.:.:.	.:.:.:.:.:.:.	.:.:.:.:.:.:.	.:.:.:.:.:.:.	.:.:.:.:.:.:.	.:.:.:.:.:.:.	.:.:.:.:.:.:.	.:.:.:.:.:.:.	.:.:.:.:.:.:.	.:.:.:.:.:.:.
	6	858366	G	A	missense variant|MODERATE|Ser -> Asn	.:.:.:.:.:.:.	.:.:.:.:.:.:.	.:.:.:.:.:.:.	.:.:.:.:.:.:.	.:.:.:.:.:.:.	Present	.:.:.:.:.:.:.	.:.:.:.:.:.:.	.:.:.:.:.:.:.	.:.:.:.:.:.:.	.:.:.:.:.:.:.	.:.:.:.:.:.:.	.:.:.:.:.:.:.	.:.:.:.:.:.:.	.:.:.:.:.:.:.	.:.:.:.:.:.:.	.:.:.:.:.:.:.	.:.:.:.:.:.:.	.:.:.:.:.:.:.	.:.:.:.:.:.:.	.:.:.:.:.:.:.	.:.:.:.:.:.:.	.:.:.:.:.:.:.	.:.:.:.:.:.:.	.:.:.:.:.:.:.	.:.:.:.:.:.:.	.:.:.:.:.:.:.	.:.:.:.:.:.:.	.:.:.:.:.:.:.	.:.:.:.:.:.:.	.:.:.:.:.:.:.	Present	.:.:.:.:.:.:.	Present	.:.:.:.:.:.:.	.:.:.:.:.:.:.	.:.:.:.:.:.:.	.:.:.:.:.:.:.	.:.:.:.:.:.:.	.:.:.:.:.:.:.	.:.:.:.:.:.:.	.:.:.:.:.:.:.	.:.:.:.:.:.:.	.:.:.:.:.:.:.
	6	858406	C	T	synonymous variant|LOW	.:.:.:.:.:.:.	.:.:.:.:.:.:.	.:.:.:.:.:.:.	.:.:.:.:.:.:.	.:.:.:.:.:.:.	.:.:.:.:.:.:.	.:.:.:.:.:.:.	.:.:.:.:.:.:.	.:.:.:.:.:.:.	.:.:.:.:.:.:.	.:.:.:.:.:.:.	.:.:.:.:.:.:.	.:.:.:.:.:.:.	.:.:.:.:.:.:.	.:.:.:.:.:.:.	.:.:.:.:.:.:.	.:.:.:.:.:.:.	.:.:.:.:.:.:.	.:.:.:.:.:.:.	.:.:.:.:.:.:.	.:.:.:.:.:.:.	.:.:.:.:.:.:.	.:.:.:.:.:.:.	.:.:.:.:.:.:.	.:.:.:.:.:.:.	.:.:.:.:.:.:.	.:.:.:.:.:.:.	.:.:.:.:.:.:.	.:.:.:.:.:.:.	.:.:.:.:.:.:.	Present	.:.:.:.:.:.:.	.:.:.:.:.:.:.	.:.:.:.:.:.:.	.:.:.:.:.:.:.	.:.:.:.:.:.:.	.:.:.:.:.:.:.	.:.:.:.:.:.:.	.:.:.:.:.:.:.	.:.:.:.:.:.:.	.:.:.:.:.:.:.	.:.:.:.:.:.:.	.:.:.:.:.:.:.	.:.:.:.:.:.:.
	6	858415	A	C	synonymous variant|LOW	.:.:.:.:.:.:.	.:.:.:.:.:.:.	.:.:.:.:.:.:.	.:.:.:.:.:.:.	.:.:.:.:.:.:.	.:.:.:.:.:.:.	.:.:.:.:.:.:.	.:.:.:.:.:.:.	Present	Present	Present	Present	Present	Present	Present	.:.:.:.:.:.:.	.:.:.:.:.:.:.	Present	Present	.:.:.:.:.:.:.	Present	.:.:.:.:.:.:.	.:.:.:.:.:.:.	.:.:.:.:.:.:.	.:.:.:.:.:.:.	.:.:.:.:.:.:.	.:.:.:.:.:.:.	.:.:.:.:.:.:.	.:.:.:.:.:.:.	.:.:.:.:.:.:.	.:.:.:.:.:.:.	.:.:.:.:.:.:.	.:.:.:.:.:.:.	.:.:.:.:.:.:.	.:.:.:.:.:.:.	.:.:.:.:.:.:.	.:.:.:.:.:.:.	.:.:.:.:.:.:.	.:.:.:.:.:.:.	.:.:.:.:.:.:.	.:.:.:.:.:.:.	.:.:.:.:.:.:.	.:.:.:.:.:.:.	.:.:.:.:.:.:.
	6	858658	C	T	synonymous variant|LOW	.:.:.:.:.:.:.	.:.:.:.:.:.:.	.:.:.:.:.:.:.	.:.:.:.:.:.:.	.:.:.:.:.:.:.	.:.:.:.:.:.:.	.:.:.:.:.:.:.	.:.:.:.:.:.:.	Present	Present	Present	Present	Present	Present	Present	.:.:.:.:.:.:.	.:.:.:.:.:.:.	Present	Present	.:.:.:.:.:.:.	Present	.:.:.:.:.:.:.	.:.:.:.:.:.:.	.:.:.:.:.:.:.	.:.:.:.:.:.:.	.:.:.:.:.:.:.	.:.:.:.:.:.:.	.:.:.:.:.:.:.	.:.:.:.:.:.:.	.:.:.:.:.:.:.	.:.:.:.:.:.:.	.:.:.:.:.:.:.	.:.:.:.:.:.:.	.:.:.:.:.:.:.	.:.:.:.:.:.:.	.:.:.:.:.:.:.	.:.:.:.:.:.:.	.:.:.:.:.:.:.	.:.:.:.:.:.:.	.:.:.:.:.:.:.	.:.:.:.:.:.:.	.:.:.:.:.:.:.	.:.:.:.:.:.:.	.:.:.:.:.:.:.
	6	858685	C	A	synonymous variant|LOW	.:.:.:.:.:.:.	.:.:.:.:.:.:.	.:.:.:.:.:.:.	.:.:.:.:.:.:.	.:.:.:.:.:.:.	.:.:.:.:.:.:.	.:.:.:.:.:.:.	.:.:.:.:.:.:.	.:.:.:.:.:.:.	.:.:.:.:.:.:.	.:.:.:.:.:.:.	.:.:.:.:.:.:.	.:.:.:.:.:.:.	.:.:.:.:.:.:.	.:.:.:.:.:.:.	.:.:.:.:.:.:.	.:.:.:.:.:.:.	.:.:.:.:.:.:.	.:.:.:.:.:.:.	.:.:.:.:.:.:.	.:.:.:.:.:.:.	.:.:.:.:.:.:.	.:.:.:.:.:.:.	.:.:.:.:.:.:.	.:.:.:.:.:.:.	.:.:.:.:.:.:.	.:.:.:.:.:.:.	.:.:.:.:.:.:.	.:.:.:.:.:.:.	.:.:.:.:.:.:.	.:.:.:.:.:.:.	Present	.:.:.:.:.:.:.	Present	.:.:.:.:.:.:.	.:.:.:.:.:.:.	.:.:.:.:.:.:.	.:.:.:.:.:.:.	.:.:.:.:.:.:.	.:.:.:.:.:.:.	.:.:.:.:.:.:.	.:.:.:.:.:.:.	.:.:.:.:.:.:.	.:.:.:.:.:.:.
	6	858727	C	T	synonymous variant|LOW	.:.:.:.:.:.:.	Present	Present	Present	Present	.:.:.:.:.:.:.	.:.:.:.:.:.:.	.:.:.:.:.:.:.	.:.:.:.:.:.:.	.:.:.:.:.:.:.	.:.:.:.:.:.:.	.:.:.:.:.:.:.	.:.:.:.:.:.:.	.:.:.:.:.:.:.	.:.:.:.:.:.:.	.:.:.:.:.:.:.	.:.:.:.:.:.:.	.:.:.:.:.:.:.	.:.:.:.:.:.:.	.:.:.:.:.:.:.	.:.:.:.:.:.:.	.:.:.:.:.:.:.	.:.:.:.:.:.:.	.:.:.:.:.:.:.	.:.:.:.:.:.:.	.:.:.:.:.:.:.	Present	Present	.:.:.:.:.:.:.	Present	.:.:.:.:.:.:.	.:.:.:.:.:.:.	.:.:.:.:.:.:.	.:.:.:.:.:.:.	.:.:.:.:.:.:.	.:.:.:.:.:.:.	.:.:.:.:.:.:.	.:.:.:.:.:.:.	.:.:.:.:.:.:.	Present	Present	.:.:.:.:.:.:.	.:.:.:.:.:.:.	.:.:.:.:.:.:.
	6	859084	G	A	synonymous variant|LOW	.:.:.:.:.:.:.	.:.:.:.:.:.:.	.:.:.:.:.:.:.	.:.:.:.:.:.:.	.:.:.:.:.:.:.	.:.:.:.:.:.:.	.:.:.:.:.:.:.	.:.:.:.:.:.:.	Present	Present	Present	Present	Present	Present	Present	.:.:.:.:.:.:.	.:.:.:.:.:.:.	.:.:.:.:.:.:.	Present	.:.:.:.:.:.:.	Present	.:.:.:.:.:.:.	.:.:.:.:.:.:.	.:.:.:.:.:.:.	.:.:.:.:.:.:.	.:.:.:.:.:.:.	.:.:.:.:.:.:.	.:.:.:.:.:.:.	.:.:.:.:.:.:.	.:.:.:.:.:.:.	.:.:.:.:.:.:.	.:.:.:.:.:.:.	.:.:.:.:.:.:.	.:.:.:.:.:.:.	.:.:.:.:.:.:.	.:.:.:.:.:.:.	.:.:.:.:.:.:.	.:.:.:.:.:.:.	.:.:.:.:.:.:.	.:.:.:.:.:.:.	.:.:.:.:.:.:.	.:.:.:.:.:.:.	.:.:.:.:.:.:.	.:.:.:.:.:.:.
sod4	6	1618285	T	C	synonymous variant|LOW	.:.:.:.:.:.:.	.:.:.:.:.:.:.	.:.:.:.:.:.:.	.:.:.:.:.:.:.	.:.:.:.:.:.:.	.:.:.:.:.:.:.	.:.:.:.:.:.:.	.:.:.:.:.:.:.	.:.:.:.:.:.:.	.:.:.:.:.:.:.	.:.:.:.:.:.:.	.:.:.:.:.:.:.	.:.:.:.:.:.:.	.:.:.:.:.:.:.	.:.:.:.:.:.:.	.:.:.:.:.:.:.	.:.:.:.:.:.:.	.:.:.:.:.:.:.	.:.:.:.:.:.:.	.:.:.:.:.:.:.	.:.:.:.:.:.:.	.:.:.:.:.:.:.	.:.:.:.:.:.:.	.:.:.:.:.:.:.	.:.:.:.:.:.:.	.:.:.:.:.:.:.	.:.:.:.:.:.:.	.:.:.:.:.:.:.	.:.:.:.:.:.:.	.:.:.:.:.:.:.	.:.:.:.:.:.:.	.:.:.:.:.:.:.	.:.:.:.:.:.:.	.:.:.:.:.:.:.	.:.:.:.:.:.:.	.:.:.:.:.:.:.	.:.:.:.:.:.:.	.:.:.:.:.:.:.	.:.:.:.:.:.:.	.:.:.:.:.:.:.	.:.:.:.:.:.:.	.:.:.:.:.:.:.	.:.:.:.:.:.:.	.:.:.:.:.:.:.
	6	1618302	G	A	synonymous variant|LOW	Present	Present	Present	Present	Present	.:.:.:.:.:.:.	Present	Present	.:.:.:.:.:.:.	.:.:.:.:.:.:.	.:.:.:.:.:.:.	.:.:.:.:.:.:.	.:.:.:.:.:.:.	.:.:.:.:.:.:.	.:.:.:.:.:.:.	.:.:.:.:.:.:.	.:.:.:.:.:.:.	.:.:.:.:.:.:.	.:.:.:.:.:.:.	.:.:.:.:.:.:.	.:.:.:.:.:.:.	Present	Present	Present	Present	Present	Present	Present	Present	Present	.:.:.:.:.:.:.	.:.:.:.:.:.:.	Present	.:.:.:.:.:.:.	Present	Present	Present	.:.:.:.:.:.:.	.:.:.:.:.:.:.	Present	Present	Present	.:.:.:.:.:.:.	Present
	6	1618353	T	C	Intron	Present	Present	Present	Present	Present	Present	Present	Present	Present	Present	Present	Present	Present	Present	Present	.:.:.:.:.:.:.	.:.:.:.:.:.:.	Present	Present	Present	Present	Present	Present	Present	Present	Present	Present	Present	Present	Present	Present	Present	Present	Present	Present	Present	Present	Present	Present	Present	Present	Present	Present	Present
	6	1618496	T	C	synonymous variant|LOW	.:.:.:.:.:.:.	.:.:.:.:.:.:.	.:.:.:.:.:.:.	.:.:.:.:.:.:.	.:.:.:.:.:.:.	.:.:.:.:.:.:.	.:.:.:.:.:.:.	.:.:.:.:.:.:.	.:.:.:.:.:.:.	.:.:.:.:.:.:.	.:.:.:.:.:.:.	.:.:.:.:.:.:.	.:.:.:.:.:.:.	.:.:.:.:.:.:.	.:.:.:.:.:.:.	.:.:.:.:.:.:.	.:.:.:.:.:.:.	.:.:.:.:.:.:.	.:.:.:.:.:.:.	.:.:.:.:.:.:.	.:.:.:.:.:.:.	.:.:.:.:.:.:.	.:.:.:.:.:.:.	.:.:.:.:.:.:.	.:.:.:.:.:.:.	.:.:.:.:.:.:.	.:.:.:.:.:.:.	.:.:.:.:.:.:.	.:.:.:.:.:.:.	.:.:.:.:.:.:.	.:.:.:.:.:.:.	.:.:.:.:.:.:.	.:.:.:.:.:.:.	.:.:.:.:.:.:.	.:.:.:.:.:.:.	.:.:.:.:.:.:.	.:.:.:.:.:.:.	.:.:.:.:.:.:.	.:.:.:.:.:.:.	.:.:.:.:.:.:.	.:.:.:.:.:.:.	.:.:.:.:.:.:.	.:.:.:.:.:.:.	.:.:.:.:.:.:.
	6	1618562	T	C	synonymous variant|LOW	.:.:.:.:.:.:.	.:.:.:.:.:.:.	.:.:.:.:.:.:.	.:.:.:.:.:.:.	.:.:.:.:.:.:.	.:.:.:.:.:.:.	.:.:.:.:.:.:.	.:.:.:.:.:.:.	.:.:.:.:.:.:.	.:.:.:.:.:.:.	.:.:.:.:.:.:.	.:.:.:.:.:.:.	.:.:.:.:.:.:.	.:.:.:.:.:.:.	.:.:.:.:.:.:.	.:.:.:.:.:.:.	.:.:.:.:.:.:.	.:.:.:.:.:.:.	.:.:.:.:.:.:.	.:.:.:.:.:.:.	.:.:.:.:.:.:.	.:.:.:.:.:.:.	.:.:.:.:.:.:.	.:.:.:.:.:.:.	.:.:.:.:.:.:.	.:.:.:.:.:.:.	.:.:.:.:.:.:.	.:.:.:.:.:.:.	.:.:.:.:.:.:.	.:.:.:.:.:.:.	.:.:.:.:.:.:.	.:.:.:.:.:.:.	.:.:.:.:.:.:.	.:.:.:.:.:.:.	.:.:.:.:.:.:.	.:.:.:.:.:.:.	.:.:.:.:.:.:.	Present	Present	.:.:.:.:.:.:.	.:.:.:.:.:.:.	.:.:.:.:.:.:.	.:.:.:.:.:.:.	.:.:.:.:.:.:.
	6	1618606	C	T,A	Intron	.:.:.:.:.:.:.	.:.:.:.:.:.:.	.:.:.:.:.:.:.	.:.:.:.:.:.:.	.:.:.:.:.:.:.	.:.:.:.:.:.:.	.:.:.:.:.:.:.	.:.:.:.:.:.:.	.:.:.:.:.:.:.	.:.:.:.:.:.:.	.:.:.:.:.:.:.	.:.:.:.:.:.:.	.:.:.:.:.:.:.	.:.:.:.:.:.:.	.:.:.:.:.:.:.	.:.:.:.:.:.:.	.:.:.:.:.:.:.	Present	.:.:.:.:.:.:.	.:.:.:.:.:.:.	.:.:.:.:.:.:.	.:.:.:.:.:.:.	.:.:.:.:.:.:.	.:.:.:.:.:.:.	.:.:.:.:.:.:.	.:.:.:.:.:.:.	.:.:.:.:.:.:.	.:.:.:.:.:.:.	.:.:.:.:.:.:.	.:.:.:.:.:.:.	.:.:.:.:.:.:.	.:.:.:.:.:.:.	.:.:.:.:.:.:.	.:.:.:.:.:.:.	.:.:.:.:.:.:.	.:.:.:.:.:.:.	.:.:.:.:.:.:.	Present	Present	.:.:.:.:.:.:.	.:.:.:.:.:.:.	.:.:.:.:.:.:.	.:.:.:.:.:.:.	.:.:.:.:.:.:.
	6	1618704	G	A	synonymous variant|LOW	.:.:.:.:.:.:.	.:.:.:.:.:.:.	.:.:.:.:.:.:.	.:.:.:.:.:.:.	.:.:.:.:.:.:.	.:.:.:.:.:.:.	.:.:.:.:.:.:.	.:.:.:.:.:.:.	Present	Present	Present	Present	Present	Present	Present	.:.:.:.:.:.:.	.:.:.:.:.:.:.	Present	Present	.:.:.:.:.:.:.	Present	.:.:.:.:.:.:.	.:.:.:.:.:.:.	.:.:.:.:.:.:.	.:.:.:.:.:.:.	.:.:.:.:.:.:.	.:.:.:.:.:.:.	.:.:.:.:.:.:.	.:.:.:.:.:.:.	.:.:.:.:.:.:.	.:.:.:.:.:.:.	.:.:.:.:.:.:.	.:.:.:.:.:.:.	.:.:.:.:.:.:.	.:.:.:.:.:.:.	.:.:.:.:.:.:.	.:.:.:.:.:.:.	.:.:.:.:.:.:.	.:.:.:.:.:.:.	.:.:.:.:.:.:.	.:.:.:.:.:.:.	.:.:.:.:.:.:.	.:.:.:.:.:.:.	.:.:.:.:.:.:.
	6	1618833	G	A	Intron	Present	Present	Present	Present	Present	.:.:.:.:.:.:.	Present	Present	.:.:.:.:.:.:.	.:.:.:.:.:.:.	.:.:.:.:.:.:.	.:.:.:.:.:.:.	.:.:.:.:.:.:.	.:.:.:.:.:.:.	.:.:.:.:.:.:.	.:.:.:.:.:.:.	.:.:.:.:.:.:.	.:.:.:.:.:.:.	.:.:.:.:.:.:.	.:.:.:.:.:.:.	.:.:.:.:.:.:.	Present	Present	Present	Present	Present	Present	Present	Present	Present	.:.:.:.:.:.:.	.:.:.:.:.:.:.	Present	.:.:.:.:.:.:.	Present	Present	Present	.:.:.:.:.:.:.	.:.:.:.:.:.:.	Present	Present	Present	.:.:.:.:.:.:.	Present
cat2	8	439323	T	A	synonymous variant|LOW	Present	Present	Present	Present	Present	Present	Present	Present	Present	Present	Present	Present	Present	Present	Present	.:.:.:.:.:.:.	.:.:.:.:.:.:.	Present	Present	Present	Present	Present	Present	Present	Present	Present	Present	Present	Present	Present	Present	Present	Present	Present	Present	Present	Present	Present	Present	Present	Present	Present	Present	Present
	8	439413	G	A	synonymous variant|LOW	Present	Present	Present	Present	Present	.:.:.:.:.:.:.	Present	Present	.:.:.:.:.:.:.	.:.:.:.:.:.:.	.:.:.:.:.:.:.	.:.:.:.:.:.:.	.:.:.:.:.:.:.	.:.:.:.:.:.:.	.:.:.:.:.:.:.	.:.:.:.:.:.:.	.:.:.:.:.:.:.	.:.:.:.:.:.:.	.:.:.:.:.:.:.	.:.:.:.:.:.:.	.:.:.:.:.:.:.	Present	Present	Present	Present	Present	Present	Present	Present	Present	Present	.:.:.:.:.:.:.	Present	.:.:.:.:.:.:.	Present	Present	Present	Present	Present	Present	Present	Present	.:.:.:.:.:.:.	Present
	8	439516	G	C	missense variant|MODERATE|Ala -> Gly	.:.:.:.:.:.:.	.:.:.:.:.:.:.	.:.:.:.:.:.:.	.:.:.:.:.:.:.	.:.:.:.:.:.:.	.:.:.:.:.:.:.	.:.:.:.:.:.:.	.:.:.:.:.:.:.	Present	Present	.:.:.:.:.:.:.	.:.:.:.:.:.:.	Present	.:.:.:.:.:.:.	Present	.:.:.:.:.:.:.	.:.:.:.:.:.:.	.:.:.:.:.:.:.	.:.:.:.:.:.:.	.:.:.:.:.:.:.	Present	.:.:.:.:.:.:.	.:.:.:.:.:.:.	.:.:.:.:.:.:.	.:.:.:.:.:.:.	.:.:.:.:.:.:.	.:.:.:.:.:.:.	.:.:.:.:.:.:.	.:.:.:.:.:.:.	.:.:.:.:.:.:.	.:.:.:.:.:.:.	.:.:.:.:.:.:.	.:.:.:.:.:.:.	.:.:.:.:.:.:.	.:.:.:.:.:.:.	.:.:.:.:.:.:.	.:.:.:.:.:.:.	.:.:.:.:.:.:.	.:.:.:.:.:.:.	.:.:.:.:.:.:.	.:.:.:.:.:.:.	.:.:.:.:.:.:.	.:.:.:.:.:.:.	.:.:.:.:.:.:.
	8	439719	C	T	synonymous variant|LOW	.:.:.:.:.:.:.	.:.:.:.:.:.:.	.:.:.:.:.:.:.	.:.:.:.:.:.:.	.:.:.:.:.:.:.	.:.:.:.:.:.:.	.:.:.:.:.:.:.	.:.:.:.:.:.:.	.:.:.:.:.:.:.	.:.:.:.:.:.:.	.:.:.:.:.:.:.	.:.:.:.:.:.:.	.:.:.:.:.:.:.	.:.:.:.:.:.:.	.:.:.:.:.:.:.	.:.:.:.:.:.:.	.:.:.:.:.:.:.	.:.:.:.:.:.:.	.:.:.:.:.:.:.	.:.:.:.:.:.:.	.:.:.:.:.:.:.	.:.:.:.:.:.:.	.:.:.:.:.:.:.	.:.:.:.:.:.:.	.:.:.:.:.:.:.	.:.:.:.:.:.:.	.:.:.:.:.:.:.	.:.:.:.:.:.:.	.:.:.:.:.:.:.	.:.:.:.:.:.:.	.:.:.:.:.:.:.	.:.:.:.:.:.:.	.:.:.:.:.:.:.	.:.:.:.:.:.:.	.:.:.:.:.:.:.	.:.:.:.:.:.:.	Present	Present	.:.:.:.:.:.:.	.:.:.:.:.:.:.	.:.:.:.:.:.:.	.:.:.:.:.:.:.	.:.:.:.:.:.:.	.:.:.:.:.:.:.
	8	439833	A	G	synonymous variant|LOW	Present	Present	Present	Present	Present	Present	Present	Present	.:.:.:.:.:.:.	.:.:.:.:.:.:.	.:.:.:.:.:.:.	.:.:.:.:.:.:.	.:.:.:.:.:.:.	.:.:.:.:.:.:.	.:.:.:.:.:.:.	.:.:.:.:.:.:.	.:.:.:.:.:.:.	Present	.:.:.:.:.:.:.	Present	.:.:.:.:.:.:.	Present	Present	Present	Present	Present	Present	Present	Present	Present	Present	Present	Present	Present	Present	Present	Present	Present	Present	Present	Present	Present	Present	Present
	8	439850	C	T	missense variant|MODERATE|Ala -> Thr	.:.:.:.:.:.:.	.:.:.:.:.:.:.	.:.:.:.:.:.:.	.:.:.:.:.:.:.	.:.:.:.:.:.:.	.:.:.:.:.:.:.	.:.:.:.:.:.:.	.:.:.:.:.:.:.	.:.:.:.:.:.:.	.:.:.:.:.:.:.	.:.:.:.:.:.:.	.:.:.:.:.:.:.	.:.:.:.:.:.:.	.:.:.:.:.:.:.	.:.:.:.:.:.:.	.:.:.:.:.:.:.	.:.:.:.:.:.:.	.:.:.:.:.:.:.	.:.:.:.:.:.:.	.:.:.:.:.:.:.	.:.:.:.:.:.:.	.:.:.:.:.:.:.	.:.:.:.:.:.:.	.:.:.:.:.:.:.	.:.:.:.:.:.:.	.:.:.:.:.:.:.	.:.:.:.:.:.:.	.:.:.:.:.:.:.	.:.:.:.:.:.:.	.:.:.:.:.:.:.	.:.:.:.:.:.:.	.:.:.:.:.:.:.	.:.:.:.:.:.:.	.:.:.:.:.:.:.	.:.:.:.:.:.:.	.:.:.:.:.:.:.	.:.:.:.:.:.:.	.:.:.:.:.:.:.	.:.:.:.:.:.:.	.:.:.:.:.:.:.	.:.:.:.:.:.:.	.:.:.:.:.:.:.	.:.:.:.:.:.:.	.:.:.:.:.:.:.
	8	439887	G	A	synonymous variant|LOW	.:.:.:.:.:.:.	.:.:.:.:.:.:.	.:.:.:.:.:.:.	.:.:.:.:.:.:.	.:.:.:.:.:.:.	.:.:.:.:.:.:.	.:.:.:.:.:.:.	.:.:.:.:.:.:.	.:.:.:.:.:.:.	.:.:.:.:.:.:.	.:.:.:.:.:.:.	.:.:.:.:.:.:.	.:.:.:.:.:.:.	.:.:.:.:.:.:.	.:.:.:.:.:.:.	.:.:.:.:.:.:.	.:.:.:.:.:.:.	.:.:.:.:.:.:.	.:.:.:.:.:.:.	.:.:.:.:.:.:.	.:.:.:.:.:.:.	.:.:.:.:.:.:.	.:.:.:.:.:.:.	.:.:.:.:.:.:.	.:.:.:.:.:.:.	.:.:.:.:.:.:.	.:.:.:.:.:.:.	.:.:.:.:.:.:.	.:.:.:.:.:.:.	.:.:.:.:.:.:.	.:.:.:.:.:.:.	.:.:.:.:.:.:.	.:.:.:.:.:.:.	.:.:.:.:.:.:.	.:.:.:.:.:.:.	.:.:.:.:.:.:.	.:.:.:.:.:.:.	Present	.:.:.:.:.:.:.	.:.:.:.:.:.:.	.:.:.:.:.:.:.	.:.:.:.:.:.:.	.:.:.:.:.:.:.	.:.:.:.:.:.:.
	8	439944	G	A	synonymous variant|LOW	Present	Present	Present	Present	Present	.:.:.:.:.:.:.	Present	Present	.:.:.:.:.:.:.	.:.:.:.:.:.:.	.:.:.:.:.:.:.	.:.:.:.:.:.:.	.:.:.:.:.:.:.	.:.:.:.:.:.:.	.:.:.:.:.:.:.	.:.:.:.:.:.:.	.:.:.:.:.:.:.	.:.:.:.:.:.:.	.:.:.:.:.:.:.	.:.:.:.:.:.:.	.:.:.:.:.:.:.	Present	Present	Present	Present	Present	Present	Present	Present	Present	Present	.:.:.:.:.:.:.	Present	.:.:.:.:.:.:.	Present	Present	Present	Present	Present	Present	Present	Present	.:.:.:.:.:.:.	Present
	8	440064	C	G	synonymous variant|LOW	Present	Present	Present	Present	Present	Present	Present	Present	.:.:.:.:.:.:.	.:.:.:.:.:.:.	.:.:.:.:.:.:.	.:.:.:.:.:.:.	.:.:.:.:.:.:.	.:.:.:.:.:.:.	.:.:.:.:.:.:.	Present	.:.:.:.:.:.:.	Present	.:.:.:.:.:.:.	Present	.:.:.:.:.:.:.	Present	Present	Present	Present	Present	Present	Present	Present	Present	Present	Present	Present	Present	Present	Present	Present	Present	Present	Present	Present	Present	Present	Present
	8	440089	G	A	missense variant|MODERATE|Ser -> Phe	.:.:.:.:.:.:.	Present	Present	Present	Present	.:.:.:.:.:.:.	.:.:.:.:.:.:.	.:.:.:.:.:.:.	.:.:.:.:.:.:.	.:.:.:.:.:.:.	.:.:.:.:.:.:.	.:.:.:.:.:.:.	.:.:.:.:.:.:.	.:.:.:.:.:.:.	.:.:.:.:.:.:.	.:.:.:.:.:.:.	.:.:.:.:.:.:.	.:.:.:.:.:.:.	.:.:.:.:.:.:.	.:.:.:.:.:.:.	.:.:.:.:.:.:.	.:.:.:.:.:.:.	.:.:.:.:.:.:.	Present	Present	.:.:.:.:.:.:.	Present	Present	.:.:.:.:.:.:.	Present	.:.:.:.:.:.:.	.:.:.:.:.:.:.	.:.:.:.:.:.:.	.:.:.:.:.:.:.	.:.:.:.:.:.:.	.:.:.:.:.:.:.	.:.:.:.:.:.:.	.:.:.:.:.:.:.	.:.:.:.:.:.:.	.:.:.:.:.:.:.	.:.:.:.:.:.:.	.:.:.:.:.:.:.	.:.:.:.:.:.:.	.:.:.:.:.:.:.
	8	440148	G	A	synonymous variant|LOW	.:.:.:.:.:.:.	.:.:.:.:.:.:.	.:.:.:.:.:.:.	.:.:.:.:.:.:.	.:.:.:.:.:.:.	.:.:.:.:.:.:.	.:.:.:.:.:.:.	.:.:.:.:.:.:.	.:.:.:.:.:.:.	.:.:.:.:.:.:.	.:.:.:.:.:.:.	.:.:.:.:.:.:.	.:.:.:.:.:.:.	.:.:.:.:.:.:.	.:.:.:.:.:.:.	.:.:.:.:.:.:.	.:.:.:.:.:.:.	.:.:.:.:.:.:.	.:.:.:.:.:.:.	Present	.:.:.:.:.:.:.	.:.:.:.:.:.:.	.:.:.:.:.:.:.	.:.:.:.:.:.:.	.:.:.:.:.:.:.	.:.:.:.:.:.:.	.:.:.:.:.:.:.	.:.:.:.:.:.:.	.:.:.:.:.:.:.	.:.:.:.:.:.:.	.:.:.:.:.:.:.	.:.:.:.:.:.:.	.:.:.:.:.:.:.	Present	.:.:.:.:.:.:.	.:.:.:.:.:.:.	.:.:.:.:.:.:.	.:.:.:.:.:.:.	.:.:.:.:.:.:.	.:.:.:.:.:.:.	.:.:.:.:.:.:.	.:.:.:.:.:.:.	Present	.:.:.:.:.:.:.
	8	440415	G	A	synonymous variant|LOW	.:.:.:.:.:.:.	.:.:.:.:.:.:.	.:.:.:.:.:.:.	.:.:.:.:.:.:.	.:.:.:.:.:.:.	.:.:.:.:.:.:.	.:.:.:.:.:.:.	.:.:.:.:.:.:.	.:.:.:.:.:.:.	.:.:.:.:.:.:.	.:.:.:.:.:.:.	.:.:.:.:.:.:.	.:.:.:.:.:.:.	.:.:.:.:.:.:.	.:.:.:.:.:.:.	.:.:.:.:.:.:.	.:.:.:.:.:.:.	.:.:.:.:.:.:.	.:.:.:.:.:.:.	.:.:.:.:.:.:.	.:.:.:.:.:.:.	.:.:.:.:.:.:.	.:.:.:.:.:.:.	.:.:.:.:.:.:.	.:.:.:.:.:.:.	.:.:.:.:.:.:.	.:.:.:.:.:.:.	.:.:.:.:.:.:.	.:.:.:.:.:.:.	.:.:.:.:.:.:.	.:.:.:.:.:.:.	.:.:.:.:.:.:.	.:.:.:.:.:.:.	.:.:.:.:.:.:.	.:.:.:.:.:.:.	.:.:.:.:.:.:.	.:.:.:.:.:.:.	.:.:.:.:.:.:.	.:.:.:.:.:.:.	.:.:.:.:.:.:.	.:.:.:.:.:.:.	.:.:.:.:.:.:.	.:.:.:.:.:.:.	.:.:.:.:.:.:.
	8	440439	C	A	missense variant|MODERATE|Lys -> Asn	.:.:.:.:.:.:.	.:.:.:.:.:.:.	.:.:.:.:.:.:.	.:.:.:.:.:.:.	.:.:.:.:.:.:.	.:.:.:.:.:.:.	.:.:.:.:.:.:.	.:.:.:.:.:.:.	.:.:.:.:.:.:.	.:.:.:.:.:.:.	Present	.:.:.:.:.:.:.	.:.:.:.:.:.:.	.:.:.:.:.:.:.	.:.:.:.:.:.:.	.:.:.:.:.:.:.	.:.:.:.:.:.:.	.:.:.:.:.:.:.	.:.:.:.:.:.:.	.:.:.:.:.:.:.	.:.:.:.:.:.:.	.:.:.:.:.:.:.	.:.:.:.:.:.:.	.:.:.:.:.:.:.	.:.:.:.:.:.:.	.:.:.:.:.:.:.	.:.:.:.:.:.:.	.:.:.:.:.:.:.	.:.:.:.:.:.:.	.:.:.:.:.:.:.	.:.:.:.:.:.:.	.:.:.:.:.:.:.	.:.:.:.:.:.:.	.:.:.:.:.:.:.	.:.:.:.:.:.:.	.:.:.:.:.:.:.	.:.:.:.:.:.:.	.:.:.:.:.:.:.	.:.:.:.:.:.:.	.:.:.:.:.:.:.	.:.:.:.:.:.:.	.:.:.:.:.:.:.	.:.:.:.:.:.:.	.:.:.:.:.:.:.
	8	440799	A	G	synonymous variant|LOW	.:.:.:.:.:.:.	.:.:.:.:.:.:.	.:.:.:.:.:.:.	.:.:.:.:.:.:.	.:.:.:.:.:.:.	.:.:.:.:.:.:.	.:.:.:.:.:.:.	.:.:.:.:.:.:.	.:.:.:.:.:.:.	.:.:.:.:.:.:.	.:.:.:.:.:.:.	.:.:.:.:.:.:.	.:.:.:.:.:.:.	.:.:.:.:.:.:.	.:.:.:.:.:.:.	.:.:.:.:.:.:.	.:.:.:.:.:.:.	.:.:.:.:.:.:.	.:.:.:.:.:.:.	.:.:.:.:.:.:.	.:.:.:.:.:.:.	.:.:.:.:.:.:.	.:.:.:.:.:.:.	.:.:.:.:.:.:.	.:.:.:.:.:.:.	.:.:.:.:.:.:.	.:.:.:.:.:.:.	.:.:.:.:.:.:.	.:.:.:.:.:.:.	.:.:.:.:.:.:.	.:.:.:.:.:.:.	.:.:.:.:.:.:.	.:.:.:.:.:.:.	.:.:.:.:.:.:.	.:.:.:.:.:.:.	.:.:.:.:.:.:.	.:.:.:.:.:.:.	.:.:.:.:.:.:.	.:.:.:.:.:.:.	.:.:.:.:.:.:.	.:.:.:.:.:.:.	.:.:.:.:.:.:.	.:.:.:.:.:.:.	.:.:.:.:.:.:.
	8	440946	C	T	synonymous variant|LOW	.:.:.:.:.:.:.	.:.:.:.:.:.:.	.:.:.:.:.:.:.	.:.:.:.:.:.:.	.:.:.:.:.:.:.	Present	.:.:.:.:.:.:.	.:.:.:.:.:.:.	.:.:.:.:.:.:.	.:.:.:.:.:.:.	.:.:.:.:.:.:.	.:.:.:.:.:.:.	.:.:.:.:.:.:.	.:.:.:.:.:.:.	.:.:.:.:.:.:.	.:.:.:.:.:.:.	.:.:.:.:.:.:.	.:.:.:.:.:.:.	.:.:.:.:.:.:.	.:.:.:.:.:.:.	.:.:.:.:.:.:.	.:.:.:.:.:.:.	.:.:.:.:.:.:.	.:.:.:.:.:.:.	.:.:.:.:.:.:.	.:.:.:.:.:.:.	.:.:.:.:.:.:.	.:.:.:.:.:.:.	.:.:.:.:.:.:.	.:.:.:.:.:.:.	.:.:.:.:.:.:.	Present	.:.:.:.:.:.:.	.:.:.:.:.:.:.	.:.:.:.:.:.:.	.:.:.:.:.:.:.	.:.:.:.:.:.:.	.:.:.:.:.:.:.	Present	.:.:.:.:.:.:.	.:.:.:.:.:.:.	.:.:.:.:.:.:.	.:.:.:.:.:.:.	.:.:.:.:.:.:.
	8	440985	G	A	synonymous variant|LOW	.:.:.:.:.:.:.	.:.:.:.:.:.:.	.:.:.:.:.:.:.	.:.:.:.:.:.:.	.:.:.:.:.:.:.	Present	.:.:.:.:.:.:.	.:.:.:.:.:.:.	.:.:.:.:.:.:.	.:.:.:.:.:.:.	.:.:.:.:.:.:.	.:.:.:.:.:.:.	.:.:.:.:.:.:.	.:.:.:.:.:.:.	.:.:.:.:.:.:.	.:.:.:.:.:.:.	.:.:.:.:.:.:.	.:.:.:.:.:.:.	.:.:.:.:.:.:.	.:.:.:.:.:.:.	.:.:.:.:.:.:.	.:.:.:.:.:.:.	.:.:.:.:.:.:.	.:.:.:.:.:.:.	.:.:.:.:.:.:.	.:.:.:.:.:.:.	.:.:.:.:.:.:.	.:.:.:.:.:.:.	.:.:.:.:.:.:.	.:.:.:.:.:.:.	.:.:.:.:.:.:.	Present	.:.:.:.:.:.:.	.:.:.:.:.:.:.	.:.:.:.:.:.:.	.:.:.:.:.:.:.	.:.:.:.:.:.:.	.:.:.:.:.:.:.	Present	.:.:.:.:.:.:.	.:.:.:.:.:.:.	.:.:.:.:.:.:.	.:.:.:.:.:.:.	.:.:.:.:.:.:.
	8	441346	T	G	missense variant|MODERATE|Lys -> Thr	.:.:.:.:.:.:.	.:.:.:.:.:.:.	.:.:.:.:.:.:.	.:.:.:.:.:.:.	.:.:.:.:.:.:.	.:.:.:.:.:.:.	.:.:.:.:.:.:.	.:.:.:.:.:.:.	.:.:.:.:.:.:.	.:.:.:.:.:.:.	.:.:.:.:.:.:.	.:.:.:.:.:.:.	.:.:.:.:.:.:.	.:.:.:.:.:.:.	.:.:.:.:.:.:.	.:.:.:.:.:.:.	.:.:.:.:.:.:.	.:.:.:.:.:.:.	.:.:.:.:.:.:.	.:.:.:.:.:.:.	.:.:.:.:.:.:.	.:.:.:.:.:.:.	.:.:.:.:.:.:.	.:.:.:.:.:.:.	.:.:.:.:.:.:.	.:.:.:.:.:.:.	.:.:.:.:.:.:.	.:.:.:.:.:.:.	.:.:.:.:.:.:.	.:.:.:.:.:.:.	.:.:.:.:.:.:.	Present	.:.:.:.:.:.:.	.:.:.:.:.:.:.	.:.:.:.:.:.:.	.:.:.:.:.:.:.	.:.:.:.:.:.:.	.:.:.:.:.:.:.	.:.:.:.:.:.:.	.:.:.:.:.:.:.	.:.:.:.:.:.:.	.:.:.:.:.:.:.	.:.:.:.:.:.:.	.:.:.:.:.:.:.
	8	441412	T	C	missense_variant|MODERATE|Asn -> Ser	.:.:.:.:.:.:.	.:.:.:.:.:.:.	.:.:.:.:.:.:.	.:.:.:.:.:.:.	.:.:.:.:.:.:.	.:.:.:.:.:.:.	.:.:.:.:.:.:.	.:.:.:.:.:.:.	.:.:.:.:.:.:.	.:.:.:.:.:.:.	.:.:.:.:.:.:.	.:.:.:.:.:.:.	.:.:.:.:.:.:.	.:.:.:.:.:.:.	.:.:.:.:.:.:.	.:.:.:.:.:.:.	.:.:.:.:.:.:.	.:.:.:.:.:.:.	.:.:.:.:.:.:.	.:.:.:.:.:.:.	.:.:.:.:.:.:.	.:.:.:.:.:.:.	.:.:.:.:.:.:.	.:.:.:.:.:.:.	.:.:.:.:.:.:.	.:.:.:.:.:.:.	.:.:.:.:.:.:.	.:.:.:.:.:.:.	.:.:.:.:.:.:.	.:.:.:.:.:.:.	.:.:.:.:.:.:.	.:.:.:.:.:.:.	.:.:.:.:.:.:.	.:.:.:.:.:.:.	.:.:.:.:.:.:.	.:.:.:.:.:.:.	.:.:.:.:.:.:.	.:.:.:.:.:.:.	.:.:.:.:.:.:.	.:.:.:.:.:.:.	.:.:.:.:.:.:.	.:.:.:.:.:.:.	.:.:.:.:.:.:.	.:.:.:.:.:.:.
	8	441498	A	G	synonymous variant|LOW	.:.:.:.:.:.:.	.:.:.:.:.:.:.	.:.:.:.:.:.:.	.:.:.:.:.:.:.	.:.:.:.:.:.:.	.:.:.:.:.:.:.	.:.:.:.:.:.:.	.:.:.:.:.:.:.	.:.:.:.:.:.:.	.:.:.:.:.:.:.	.:.:.:.:.:.:.	.:.:.:.:.:.:.	.:.:.:.:.:.:.	.:.:.:.:.:.:.	.:.:.:.:.:.:.	.:.:.:.:.:.:.	.:.:.:.:.:.:.	.:.:.:.:.:.:.	.:.:.:.:.:.:.	Present	.:.:.:.:.:.:.	.:.:.:.:.:.:.	.:.:.:.:.:.:.	.:.:.:.:.:.:.	.:.:.:.:.:.:.	.:.:.:.:.:.:.	.:.:.:.:.:.:.	.:.:.:.:.:.:.	.:.:.:.:.:.:.	.:.:.:.:.:.:.	.:.:.:.:.:.:.	.:.:.:.:.:.:.	.:.:.:.:.:.:.	Present	.:.:.:.:.:.:.	.:.:.:.:.:.:.	Present	Present	.:.:.:.:.:.:.	.:.:.:.:.:.:.	.:.:.:.:.:.:.	.:.:.:.:.:.:.	.:.:.:.:.:.:.	.:.:.:.:.:.:.
sakA	1	3428201	C	T	synonymous variant|LOW	.:.:.:.:.:.:.	.:.:.:.:.:.:.	.:.:.:.:.:.:.	.:.:.:.:.:.:.	.:.:.:.:.:.:.	.:.:.:.:.:.:.	.:.:.:.:.:.:.	.:.:.:.:.:.:.	.:.:.:.:.:.:.	.:.:.:.:.:.:.	.:.:.:.:.:.:.	.:.:.:.:.:.:.	.:.:.:.:.:.:.	.:.:.:.:.:.:.	.:.:.:.:.:.:.	.:.:.:.:.:.:.	.:.:.:.:.:.:.	.:.:.:.:.:.:.	.:.:.:.:.:.:.	.:.:.:.:.:.:.	.:.:.:.:.:.:.	.:.:.:.:.:.:.	.:.:.:.:.:.:.	.:.:.:.:.:.:.	.:.:.:.:.:.:.	.:.:.:.:.:.:.	.:.:.:.:.:.:.	.:.:.:.:.:.:.	.:.:.:.:.:.:.	.:.:.:.:.:.:.	.:.:.:.:.:.:.	.:.:.:.:.:.:.	.:.:.:.:.:.:.	.:.:.:.:.:.:.	.:.:.:.:.:.:.	.:.:.:.:.:.:.	.:.:.:.:.:.:.	.:.:.:.:.:.:.	.:.:.:.:.:.:.	.:.:.:.:.:.:.	.:.:.:.:.:.:.	.:.:.:.:.:.:.	.:.:.:.:.:.:.	.:.:.:.:.:.:.
	1	3428356	A	G	Intron	.:.:.:.:.:.:.	.:.:.:.:.:.:.	.:.:.:.:.:.:.	.:.:.:.:.:.:.	.:.:.:.:.:.:.	.:.:.:.:.:.:.	.:.:.:.:.:.:.	.:.:.:.:.:.:.	Present	Present	Present	Present	Present	Present	Present	.:.:.:.:.:.:.	.:.:.:.:.:.:.	Present	Present	.:.:.:.:.:.:.	Present	.:.:.:.:.:.:.	.:.:.:.:.:.:.	.:.:.:.:.:.:.	.:.:.:.:.:.:.	.:.:.:.:.:.:.	.:.:.:.:.:.:.	.:.:.:.:.:.:.	.:.:.:.:.:.:.	.:.:.:.:.:.:.	.:.:.:.:.:.:.	.:.:.:.:.:.:.	.:.:.:.:.:.:.	.:.:.:.:.:.:.	.:.:.:.:.:.:.	.:.:.:.:.:.:.	.:.:.:.:.:.:.	.:.:.:.:.:.:.	.:.:.:.:.:.:.	.:.:.:.:.:.:.	.:.:.:.:.:.:.	.:.:.:.:.:.:.	.:.:.:.:.:.:.	.:.:.:.:.:.:.
	1	3428614	G	C	Intron	.:.:.:.:.:.:.	.:.:.:.:.:.:.	.:.:.:.:.:.:.	.:.:.:.:.:.:.	.:.:.:.:.:.:.	.:.:.:.:.:.:.	.:.:.:.:.:.:.	.:.:.:.:.:.:.	.:.:.:.:.:.:.	.:.:.:.:.:.:.	.:.:.:.:.:.:.	.:.:.:.:.:.:.	.:.:.:.:.:.:.	.:.:.:.:.:.:.	.:.:.:.:.:.:.	.:.:.:.:.:.:.	.:.:.:.:.:.:.	.:.:.:.:.:.:.	.:.:.:.:.:.:.	.:.:.:.:.:.:.	.:.:.:.:.:.:.	.:.:.:.:.:.:.	.:.:.:.:.:.:.	.:.:.:.:.:.:.	.:.:.:.:.:.:.	.:.:.:.:.:.:.	.:.:.:.:.:.:.	.:.:.:.:.:.:.	.:.:.:.:.:.:.	.:.:.:.:.:.:.	.:.:.:.:.:.:.	.:.:.:.:.:.:.	.:.:.:.:.:.:.	.:.:.:.:.:.:.	.:.:.:.:.:.:.	.:.:.:.:.:.:.	.:.:.:.:.:.:.	.:.:.:.:.:.:.	.:.:.:.:.:.:.	.:.:.:.:.:.:.	.:.:.:.:.:.:.	.:.:.:.:.:.:.	.:.:.:.:.:.:.	Present
	1	3428855	T	C	Intron	.:.:.:.:.:.:.	.:.:.:.:.:.:.	.:.:.:.:.:.:.	.:.:.:.:.:.:.	.:.:.:.:.:.:.	.:.:.:.:.:.:.	.:.:.:.:.:.:.	.:.:.:.:.:.:.	Present	Present	Present	Present	Present	Present	Present	.:.:.:.:.:.:.	.:.:.:.:.:.:.	Present	Present	.:.:.:.:.:.:.	Present	.:.:.:.:.:.:.	.:.:.:.:.:.:.	.:.:.:.:.:.:.	.:.:.:.:.:.:.	.:.:.:.:.:.:.	.:.:.:.:.:.:.	.:.:.:.:.:.:.	.:.:.:.:.:.:.	.:.:.:.:.:.:.	.:.:.:.:.:.:.	.:.:.:.:.:.:.	.:.:.:.:.:.:.	.:.:.:.:.:.:.	.:.:.:.:.:.:.	.:.:.:.:.:.:.	.:.:.:.:.:.:.	.:.:.:.:.:.:.	.:.:.:.:.:.:.	.:.:.:.:.:.:.	.:.:.:.:.:.:.	.:.:.:.:.:.:.	.:.:.:.:.:.:.	.:.:.:.:.:.:.
	1	3429174	A	G	synonymous variant|LOW	.:.:.:.:.:.:.	.:.:.:.:.:.:.	.:.:.:.:.:.:.	.:.:.:.:.:.:.	.:.:.:.:.:.:.	.:.:.:.:.:.:.	.:.:.:.:.:.:.	.:.:.:.:.:.:.	Present	Present	Present	Present	Present	Present	Present	.:.:.:.:.:.:.	.:.:.:.:.:.:.	Present	Present	.:.:.:.:.:.:.	Present	.:.:.:.:.:.:.	.:.:.:.:.:.:.	.:.:.:.:.:.:.	.:.:.:.:.:.:.	.:.:.:.:.:.:.	.:.:.:.:.:.:.	.:.:.:.:.:.:.	.:.:.:.:.:.:.	.:.:.:.:.:.:.	.:.:.:.:.:.:.	.:.:.:.:.:.:.	.:.:.:.:.:.:.	.:.:.:.:.:.:.	.:.:.:.:.:.:.	.:.:.:.:.:.:.	.:.:.:.:.:.:.	.:.:.:.:.:.:.	.:.:.:.:.:.:.	.:.:.:.:.:.:.	.:.:.:.:.:.:.	.:.:.:.:.:.:.	.:.:.:.:.:.:.	.:.:.:.:.:.:.
	1	3429417	T	C	splice region variant&intron variant|LOW	.:.:.:.:.:.:.	.:.:.:.:.:.:.	.:.:.:.:.:.:.	.:.:.:.:.:.:.	.:.:.:.:.:.:.	.:.:.:.:.:.:.	.:.:.:.:.:.:.	.:.:.:.:.:.:.	.:.:.:.:.:.:.	.:.:.:.:.:.:.	.:.:.:.:.:.:.	.:.:.:.:.:.:.	.:.:.:.:.:.:.	.:.:.:.:.:.:.	.:.:.:.:.:.:.	.:.:.:.:.:.:.	.:.:.:.:.:.:.	.:.:.:.:.:.:.	.:.:.:.:.:.:.	.:.:.:.:.:.:.	.:.:.:.:.:.:.	.:.:.:.:.:.:.	.:.:.:.:.:.:.	.:.:.:.:.:.:.	.:.:.:.:.:.:.	.:.:.:.:.:.:.	.:.:.:.:.:.:.	.:.:.:.:.:.:.	.:.:.:.:.:.:.	Present	.:.:.:.:.:.:.	.:.:.:.:.:.:.	.:.:.:.:.:.:.	.:.:.:.:.:.:.	.:.:.:.:.:.:.	.:.:.:.:.:.:.	.:.:.:.:.:.:.	.:.:.:.:.:.:.	.:.:.:.:.:.:.	.:.:.:.:.:.:.	.:.:.:.:.:.:.	.:.:.:.:.:.:.	.:.:.:.:.:.:.	.:.:.:.:.:.:.
	1	3429452	T	G	Intron	.:.:.:.:.:.:.	.:.:.:.:.:.:.	.:.:.:.:.:.:.	.:.:.:.:.:.:.	.:.:.:.:.:.:.	.:.:.:.:.:.:.	.:.:.:.:.:.:.	.:.:.:.:.:.:.	Present	Present	Present	Present	Present	Present	Present	.:.:.:.:.:.:.	.:.:.:.:.:.:.	Present	Present	.:.:.:.:.:.:.	Present	.:.:.:.:.:.:.	.:.:.:.:.:.:.	.:.:.:.:.:.:.	.:.:.:.:.:.:.	.:.:.:.:.:.:.	.:.:.:.:.:.:.	.:.:.:.:.:.:.	.:.:.:.:.:.:.	.:.:.:.:.:.:.	.:.:.:.:.:.:.	.:.:.:.:.:.:.	.:.:.:.:.:.:.	.:.:.:.:.:.:.	.:.:.:.:.:.:.	.:.:.:.:.:.:.	.:.:.:.:.:.:.	.:.:.:.:.:.:.	.:.:.:.:.:.:.	.:.:.:.:.:.:.	.:.:.:.:.:.:.	.:.:.:.:.:.:.	.:.:.:.:.:.:.	.:.:.:.:.:.:.
	1	3429573	G	A	synonymous variant|LOW	.:.:.:.:.:.:.	.:.:.:.:.:.:.	.:.:.:.:.:.:.	.:.:.:.:.:.:.	.:.:.:.:.:.:.	.:.:.:.:.:.:.	.:.:.:.:.:.:.	.:.:.:.:.:.:.	.:.:.:.:.:.:.	.:.:.:.:.:.:.	.:.:.:.:.:.:.	.:.:.:.:.:.:.	.:.:.:.:.:.:.	.:.:.:.:.:.:.	.:.:.:.:.:.:.	.:.:.:.:.:.:.	.:.:.:.:.:.:.	.:.:.:.:.:.:.	.:.:.:.:.:.:.	Present	.:.:.:.:.:.:.	.:.:.:.:.:.:.	.:.:.:.:.:.:.	.:.:.:.:.:.:.	.:.:.:.:.:.:.	.:.:.:.:.:.:.	.:.:.:.:.:.:.	.:.:.:.:.:.:.	.:.:.:.:.:.:.	.:.:.:.:.:.:.	Present	.:.:.:.:.:.:.	.:.:.:.:.:.:.	.:.:.:.:.:.:.	.:.:.:.:.:.:.	.:.:.:.:.:.:.	.:.:.:.:.:.:.	.:.:.:.:.:.:.	.:.:.:.:.:.:.	.:.:.:.:.:.:.	.:.:.:.:.:.:.	.:.:.:.:.:.:.	.:.:.:.:.:.:.	.:.:.:.:.:.:.
pbs2	1	4328692	T	A	synonymous variant|LOW	.:.:.:.:.:.:.	.:.:.:.:.:.:.	.:.:.:.:.:.:.	.:.:.:.:.:.:.	.:.:.:.:.:.:.	.:.:.:.:.:.:.	.:.:.:.:.:.:.	.:.:.:.:.:.:.	.:.:.:.:.:.:.	.:.:.:.:.:.:.	.:.:.:.:.:.:.	.:.:.:.:.:.:.	.:.:.:.:.:.:.	.:.:.:.:.:.:.	.:.:.:.:.:.:.	.:.:.:.:.:.:.	.:.:.:.:.:.:.	.:.:.:.:.:.:.	.:.:.:.:.:.:.	.:.:.:.:.:.:.	.:.:.:.:.:.:.	.:.:.:.:.:.:.	.:.:.:.:.:.:.	.:.:.:.:.:.:.	.:.:.:.:.:.:.	.:.:.:.:.:.:.	.:.:.:.:.:.:.	.:.:.:.:.:.:.	.:.:.:.:.:.:.	.:.:.:.:.:.:.	.:.:.:.:.:.:.	.:.:.:.:.:.:.	.:.:.:.:.:.:.	.:.:.:.:.:.:.	.:.:.:.:.:.:.	.:.:.:.:.:.:.	.:.:.:.:.:.:.	.:.:.:.:.:.:.	.:.:.:.:.:.:.	.:.:.:.:.:.:.	.:.:.:.:.:.:.	.:.:.:.:.:.:.	.:.:.:.:.:.:.	.:.:.:.:.:.:.
	1	4328841	C	A	missense variant|MODERATE|Ala -> Glu	.:.:.:.:.:.:.	.:.:.:.:.:.:.	.:.:.:.:.:.:.	.:.:.:.:.:.:.	.:.:.:.:.:.:.	.:.:.:.:.:.:.	.:.:.:.:.:.:.	.:.:.:.:.:.:.	.:.:.:.:.:.:.	.:.:.:.:.:.:.	.:.:.:.:.:.:.	.:.:.:.:.:.:.	.:.:.:.:.:.:.	.:.:.:.:.:.:.	.:.:.:.:.:.:.	.:.:.:.:.:.:.	.:.:.:.:.:.:.	.:.:.:.:.:.:.	.:.:.:.:.:.:.	.:.:.:.:.:.:.	Present	.:.:.:.:.:.:.	.:.:.:.:.:.:.	.:.:.:.:.:.:.	.:.:.:.:.:.:.	.:.:.:.:.:.:.	.:.:.:.:.:.:.	.:.:.:.:.:.:.	.:.:.:.:.:.:.	.:.:.:.:.:.:.	.:.:.:.:.:.:.	.:.:.:.:.:.:.	.:.:.:.:.:.:.	.:.:.:.:.:.:.	.:.:.:.:.:.:.	.:.:.:.:.:.:.	.:.:.:.:.:.:.	.:.:.:.:.:.:.	.:.:.:.:.:.:.	.:.:.:.:.:.:.	.:.:.:.:.:.:.	.:.:.:.:.:.:.	.:.:.:.:.:.:.	.:.:.:.:.:.:.
	1	4328911	C	T	synonymous variant|LOW	Present	Present	Present	Present	Present	Present	Present	Present	Present	Present	Present	Present	Present	Present	Present	.:.:.:.:.:.:.	.:.:.:.:.:.:.	Present	Present	Present	Present	Present	Present	Present	Present	Present	Present	Present	Present	Present	Present	Present	Present	Present	Present	Present	Present	Present	.:.:.:.:.:.:.	Present	Present	Present	Present	Present
	1	4329016	A	C	synonymous variant|LOW	.:.:.:.:.:.:.	.:.:.:.:.:.:.	.:.:.:.:.:.:.	.:.:.:.:.:.:.	.:.:.:.:.:.:.	.:.:.:.:.:.:.	.:.:.:.:.:.:.	.:.:.:.:.:.:.	.:.:.:.:.:.:.	.:.:.:.:.:.:.	.:.:.:.:.:.:.	.:.:.:.:.:.:.	.:.:.:.:.:.:.	.:.:.:.:.:.:.	.:.:.:.:.:.:.	.:.:.:.:.:.:.	.:.:.:.:.:.:.	.:.:.:.:.:.:.	.:.:.:.:.:.:.	.:.:.:.:.:.:.	.:.:.:.:.:.:.	.:.:.:.:.:.:.	.:.:.:.:.:.:.	.:.:.:.:.:.:.	.:.:.:.:.:.:.	.:.:.:.:.:.:.	.:.:.:.:.:.:.	.:.:.:.:.:.:.	.:.:.:.:.:.:.	.:.:.:.:.:.:.	.:.:.:.:.:.:.	.:.:.:.:.:.:.	.:.:.:.:.:.:.	.:.:.:.:.:.:.	.:.:.:.:.:.:.	.:.:.:.:.:.:.	.:.:.:.:.:.:.	.:.:.:.:.:.:.	.:.:.:.:.:.:.	.:.:.:.:.:.:.	.:.:.:.:.:.:.	.:.:.:.:.:.:.	.:.:.:.:.:.:.	.:.:.:.:.:.:.
	1	4329162	G	C	missense variant|MODERATE|Gly -> Ala	.:.:.:.:.:.:.	.:.:.:.:.:.:.	.:.:.:.:.:.:.	.:.:.:.:.:.:.	.:.:.:.:.:.:.	.:.:.:.:.:.:.	.:.:.:.:.:.:.	.:.:.:.:.:.:.	.:.:.:.:.:.:.	.:.:.:.:.:.:.	.:.:.:.:.:.:.	.:.:.:.:.:.:.	.:.:.:.:.:.:.	.:.:.:.:.:.:.	.:.:.:.:.:.:.	.:.:.:.:.:.:.	.:.:.:.:.:.:.	.:.:.:.:.:.:.	.:.:.:.:.:.:.	.:.:.:.:.:.:.	.:.:.:.:.:.:.	.:.:.:.:.:.:.	.:.:.:.:.:.:.	.:.:.:.:.:.:.	.:.:.:.:.:.:.	.:.:.:.:.:.:.	.:.:.:.:.:.:.	.:.:.:.:.:.:.	.:.:.:.:.:.:.	.:.:.:.:.:.:.	.:.:.:.:.:.:.	Present	.:.:.:.:.:.:.	Present	.:.:.:.:.:.:.	.:.:.:.:.:.:.	.:.:.:.:.:.:.	.:.:.:.:.:.:.	.:.:.:.:.:.:.	.:.:.:.:.:.:.	.:.:.:.:.:.:.	.:.:.:.:.:.:.	.:.:.:.:.:.:.	.:.:.:.:.:.:.
	1	4329525	C	T	missense variant|MODERATE|Ser -> Phe	.:.:.:.:.:.:.	.:.:.:.:.:.:.	.:.:.:.:.:.:.	.:.:.:.:.:.:.	.:.:.:.:.:.:.	.:.:.:.:.:.:.	.:.:.:.:.:.:.	.:.:.:.:.:.:.	.:.:.:.:.:.:.	.:.:.:.:.:.:.	.:.:.:.:.:.:.	.:.:.:.:.:.:.	.:.:.:.:.:.:.	.:.:.:.:.:.:.	.:.:.:.:.:.:.	.:.:.:.:.:.:.	.:.:.:.:.:.:.	Present	.:.:.:.:.:.:.	.:.:.:.:.:.:.	.:.:.:.:.:.:.	.:.:.:.:.:.:.	.:.:.:.:.:.:.	.:.:.:.:.:.:.	.:.:.:.:.:.:.	.:.:.:.:.:.:.	.:.:.:.:.:.:.	.:.:.:.:.:.:.	.:.:.:.:.:.:.	.:.:.:.:.:.:.	.:.:.:.:.:.:.	.:.:.:.:.:.:.	.:.:.:.:.:.:.	.:.:.:.:.:.:.	.:.:.:.:.:.:.	.:.:.:.:.:.:.	.:.:.:.:.:.:.	.:.:.:.:.:.:.	.:.:.:.:.:.:.	.:.:.:.:.:.:.	.:.:.:.:.:.:.	.:.:.:.:.:.:.	.:.:.:.:.:.:.	.:.:.:.:.:.:.
	1	4329823	T	C	synonymous variant|LOW	.:.:.:.:.:.:.	.:.:.:.:.:.:.	.:.:.:.:.:.:.	.:.:.:.:.:.:.	.:.:.:.:.:.:.	.:.:.:.:.:.:.	.:.:.:.:.:.:.	.:.:.:.:.:.:.	.:.:.:.:.:.:.	.:.:.:.:.:.:.	.:.:.:.:.:.:.	.:.:.:.:.:.:.	.:.:.:.:.:.:.	.:.:.:.:.:.:.	.:.:.:.:.:.:.	.:.:.:.:.:.:.	.:.:.:.:.:.:.	.:.:.:.:.:.:.	.:.:.:.:.:.:.	.:.:.:.:.:.:.	.:.:.:.:.:.:.	.:.:.:.:.:.:.	.:.:.:.:.:.:.	.:.:.:.:.:.:.	.:.:.:.:.:.:.	.:.:.:.:.:.:.	.:.:.:.:.:.:.	.:.:.:.:.:.:.	.:.:.:.:.:.:.	.:.:.:.:.:.:.	.:.:.:.:.:.:.	.:.:.:.:.:.:.	.:.:.:.:.:.:.	.:.:.:.:.:.:.	.:.:.:.:.:.:.	.:.:.:.:.:.:.	.:.:.:.:.:.:.	.:.:.:.:.:.:.	.:.:.:.:.:.:.	.:.:.:.:.:.:.	.:.:.:.:.:.:.	.:.:.:.:.:.:.	.:.:.:.:.:.:.	.:.:.:.:.:.:.
	1	4329853	G	A	synonymous variant|LOW	.:.:.:.:.:.:.	.:.:.:.:.:.:.	.:.:.:.:.:.:.	.:.:.:.:.:.:.	.:.:.:.:.:.:.	.:.:.:.:.:.:.	.:.:.:.:.:.:.	.:.:.:.:.:.:.	Present	.:.:.:.:.:.:.	.:.:.:.:.:.:.	.:.:.:.:.:.:.	Present	.:.:.:.:.:.:.	.:.:.:.:.:.:.	.:.:.:.:.:.:.	.:.:.:.:.:.:.	.:.:.:.:.:.:.	.:.:.:.:.:.:.	.:.:.:.:.:.:.	.:.:.:.:.:.:.	.:.:.:.:.:.:.	.:.:.:.:.:.:.	.:.:.:.:.:.:.	.:.:.:.:.:.:.	.:.:.:.:.:.:.	.:.:.:.:.:.:.	.:.:.:.:.:.:.	.:.:.:.:.:.:.	.:.:.:.:.:.:.	.:.:.:.:.:.:.	.:.:.:.:.:.:.	.:.:.:.:.:.:.	.:.:.:.:.:.:.	.:.:.:.:.:.:.	.:.:.:.:.:.:.	.:.:.:.:.:.:.	.:.:.:.:.:.:.	.:.:.:.:.:.:.	.:.:.:.:.:.:.	.:.:.:.:.:.:.	.:.:.:.:.:.:.	.:.:.:.:.:.:.	.:.:.:.:.:.:.
	1	4330187	C	T	Intron	.:.:.:.:.:.:.	.:.:.:.:.:.:.	.:.:.:.:.:.:.	.:.:.:.:.:.:.	.:.:.:.:.:.:.	.:.:.:.:.:.:.	.:.:.:.:.:.:.	.:.:.:.:.:.:.	.:.:.:.:.:.:.	.:.:.:.:.:.:.	.:.:.:.:.:.:.	.:.:.:.:.:.:.	.:.:.:.:.:.:.	.:.:.:.:.:.:.	.:.:.:.:.:.:.	.:.:.:.:.:.:.	.:.:.:.:.:.:.	.:.:.:.:.:.:.	.:.:.:.:.:.:.	.:.:.:.:.:.:.	.:.:.:.:.:.:.	.:.:.:.:.:.:.	.:.:.:.:.:.:.	.:.:.:.:.:.:.	.:.:.:.:.:.:.	.:.:.:.:.:.:.	.:.:.:.:.:.:.	.:.:.:.:.:.:.	.:.:.:.:.:.:.	.:.:.:.:.:.:.	.:.:.:.:.:.:.	.:.:.:.:.:.:.	.:.:.:.:.:.:.	.:.:.:.:.:.:.	.:.:.:.:.:.:.	.:.:.:.:.:.:.	.:.:.:.:.:.:.	.:.:.:.:.:.:.	.:.:.:.:.:.:.	.:.:.:.:.:.:.	.:.:.:.:.:.:.	.:.:.:.:.:.:.	.:.:.:.:.:.:.	.:.:.:.:.:.:.
	1	4330544	A	G	synonymous variant|LOW	Present	Present	Present	Present	Present	Present	Present	Present	Present	Present	Present	Present	Present	Present	Present	Present	Present	Present	Present	Present	Present	Present	Present	Present	Present	Present	Present	Present	Present	Present	Present	Present	Present	Present	Present	Present	Present	Present	Present	Present	Present	Present	Present	Present
tcsB	2	144877	T	C	splice acceptor variant&intron variant|HIGH	.:.:.:.:.:.:.	.:.:.:.:.:.:.	.:.:.:.:.:.:.	.:.:.:.:.:.:.	.:.:.:.:.:.:.	.:.:.:.:.:.:.	.:.:.:.:.:.:.	.:.:.:.:.:.:.	.:.:.:.:.:.:.	.:.:.:.:.:.:.	.:.:.:.:.:.:.	.:.:.:.:.:.:.	.:.:.:.:.:.:.	.:.:.:.:.:.:.	.:.:.:.:.:.:.	.:.:.:.:.:.:.	.:.:.:.:.:.:.	.:.:.:.:.:.:.	.:.:.:.:.:.:.	.:.:.:.:.:.:.	.:.:.:.:.:.:.	.:.:.:.:.:.:.	.:.:.:.:.:.:.	.:.:.:.:.:.:.	Present	Present	.:.:.:.:.:.:.	.:.:.:.:.:.:.	.:.:.:.:.:.:.	.:.:.:.:.:.:.	.:.:.:.:.:.:.	.:.:.:.:.:.:.	.:.:.:.:.:.:.	.:.:.:.:.:.:.	Present	.:.:.:.:.:.:.	.:.:.:.:.:.:.	.:.:.:.:.:.:.	.:.:.:.:.:.:.	.:.:.:.:.:.:.	.:.:.:.:.:.:.	Present	.:.:.:.:.:.:.	.:.:.:.:.:.:.
	2	144931	A	G	missense variant|MODERATE|Met -> Thr	.:.:.:.:.:.:.	.:.:.:.:.:.:.	.:.:.:.:.:.:.	.:.:.:.:.:.:.	.:.:.:.:.:.:.	.:.:.:.:.:.:.	.:.:.:.:.:.:.	.:.:.:.:.:.:.	Present	Present	Present	.:.:.:.:.:.:.	Present	.:.:.:.:.:.:.	Present	.:.:.:.:.:.:.	.:.:.:.:.:.:.	.:.:.:.:.:.:.	Present	.:.:.:.:.:.:.	Present	.:.:.:.:.:.:.	.:.:.:.:.:.:.	.:.:.:.:.:.:.	.:.:.:.:.:.:.	.:.:.:.:.:.:.	.:.:.:.:.:.:.	.:.:.:.:.:.:.	.:.:.:.:.:.:.	.:.:.:.:.:.:.	.:.:.:.:.:.:.	.:.:.:.:.:.:.	.:.:.:.:.:.:.	.:.:.:.:.:.:.	.:.:.:.:.:.:.	.:.:.:.:.:.:.	.:.:.:.:.:.:.	.:.:.:.:.:.:.	.:.:.:.:.:.:.	.:.:.:.:.:.:.	.:.:.:.:.:.:.	.:.:.:.:.:.:.	.:.:.:.:.:.:.	.:.:.:.:.:.:.
	2	145050	G	A	synonymous variant|LOW	Present	Present	Present	Present	Present	Present	Present	Present	.:.:.:.:.:.:.	.:.:.:.:.:.:.	.:.:.:.:.:.:.	.:.:.:.:.:.:.	.:.:.:.:.:.:.	.:.:.:.:.:.:.	.:.:.:.:.:.:.	Present	.:.:.:.:.:.:.	.:.:.:.:.:.:.	.:.:.:.:.:.:.	Present	.:.:.:.:.:.:.	Present	Present	Present	Present	Present	Present	Present	Present	Present	.:.:.:.:.:.:.	.:.:.:.:.:.:.	Present	.:.:.:.:.:.:.	Present	Present	Present	.:.:.:.:.:.:.	.:.:.:.:.:.:.	Present	Present	Present	Present	.:.:.:.:.:.:.
	2	145070	A	G	Intron	Present	Present	Present	Present	Present	Present	Present	Present	Present	Present	Present	Present	Present	Present	Present	Present	.:.:.:.:.:.:.	Present	Present	Present	Present	Present	Present	Present	Present	Present	Present	Present	Present	Present	.:.:.:.:.:.:.	.:.:.:.:.:.:.	Present	.:.:.:.:.:.:.	Present	Present	Present	.:.:.:.:.:.:.	.:.:.:.:.:.:.	Present	Present	Present	Present	.:.:.:.:.:.:.
	2	145129	C	A	missense variant|MODERATE|Val -> Leu	.:.:.:.:.:.:.	.:.:.:.:.:.:.	.:.:.:.:.:.:.	.:.:.:.:.:.:.	.:.:.:.:.:.:.	.:.:.:.:.:.:.	.:.:.:.:.:.:.	.:.:.:.:.:.:.	Present	Present	Present	Present	Present	Present	Present	.:.:.:.:.:.:.	.:.:.:.:.:.:.	Present	Present	.:.:.:.:.:.:.	Present	.:.:.:.:.:.:.	.:.:.:.:.:.:.	.:.:.:.:.:.:.	.:.:.:.:.:.:.	.:.:.:.:.:.:.	.:.:.:.:.:.:.	.:.:.:.:.:.:.	.:.:.:.:.:.:.	.:.:.:.:.:.:.	.:.:.:.:.:.:.	.:.:.:.:.:.:.	.:.:.:.:.:.:.	.:.:.:.:.:.:.	.:.:.:.:.:.:.	.:.:.:.:.:.:.	.:.:.:.:.:.:.	.:.:.:.:.:.:.	.:.:.:.:.:.:.	.:.:.:.:.:.:.	.:.:.:.:.:.:.	.:.:.:.:.:.:.	.:.:.:.:.:.:.	.:.:.:.:.:.:.
	2	145226	A	T	synonymous variant|LOW	.:.:.:.:.:.:.	.:.:.:.:.:.:.	.:.:.:.:.:.:.	.:.:.:.:.:.:.	.:.:.:.:.:.:.	.:.:.:.:.:.:.	.:.:.:.:.:.:.	.:.:.:.:.:.:.	Present	Present	Present	Present	Present	Present	Present	.:.:.:.:.:.:.	.:.:.:.:.:.:.	Present	Present	.:.:.:.:.:.:.	Present	.:.:.:.:.:.:.	.:.:.:.:.:.:.	.:.:.:.:.:.:.	.:.:.:.:.:.:.	.:.:.:.:.:.:.	.:.:.:.:.:.:.	.:.:.:.:.:.:.	.:.:.:.:.:.:.	.:.:.:.:.:.:.	.:.:.:.:.:.:.	.:.:.:.:.:.:.	.:.:.:.:.:.:.	.:.:.:.:.:.:.	.:.:.:.:.:.:.	.:.:.:.:.:.:.	.:.:.:.:.:.:.	.:.:.:.:.:.:.	.:.:.:.:.:.:.	.:.:.:.:.:.:.	.:.:.:.:.:.:.	.:.:.:.:.:.:.	.:.:.:.:.:.:.	.:.:.:.:.:.:.
	2	145242	G	A	Intron	.:.:.:.:.:.:.	.:.:.:.:.:.:.	.:.:.:.:.:.:.	.:.:.:.:.:.:.	.:.:.:.:.:.:.	.:.:.:.:.:.:.	.:.:.:.:.:.:.	.:.:.:.:.:.:.	Present	Present	Present	Present	Present	Present	Present	.:.:.:.:.:.:.	.:.:.:.:.:.:.	Present	Present	.:.:.:.:.:.:.	Present	.:.:.:.:.:.:.	.:.:.:.:.:.:.	.:.:.:.:.:.:.	.:.:.:.:.:.:.	.:.:.:.:.:.:.	.:.:.:.:.:.:.	.:.:.:.:.:.:.	.:.:.:.:.:.:.	.:.:.:.:.:.:.	.:.:.:.:.:.:.	.:.:.:.:.:.:.	.:.:.:.:.:.:.	.:.:.:.:.:.:.	.:.:.:.:.:.:.	.:.:.:.:.:.:.	.:.:.:.:.:.:.	.:.:.:.:.:.:.	.:.:.:.:.:.:.	.:.:.:.:.:.:.	.:.:.:.:.:.:.	.:.:.:.:.:.:.	.:.:.:.:.:.:.	.:.:.:.:.:.:.
	2	145336	G	T	synonymous variant|LOW	.:.:.:.:.:.:.	.:.:.:.:.:.:.	.:.:.:.:.:.:.	.:.:.:.:.:.:.	.:.:.:.:.:.:.	.:.:.:.:.:.:.	.:.:.:.:.:.:.	.:.:.:.:.:.:.	Present	Present	Present	Present	Present	Present	Present	.:.:.:.:.:.:.	.:.:.:.:.:.:.	Present	Present	.:.:.:.:.:.:.	Present	.:.:.:.:.:.:.	.:.:.:.:.:.:.	.:.:.:.:.:.:.	.:.:.:.:.:.:.	.:.:.:.:.:.:.	.:.:.:.:.:.:.	.:.:.:.:.:.:.	.:.:.:.:.:.:.	.:.:.:.:.:.:.	.:.:.:.:.:.:.	.:.:.:.:.:.:.	.:.:.:.:.:.:.	.:.:.:.:.:.:.	.:.:.:.:.:.:.	.:.:.:.:.:.:.	.:.:.:.:.:.:.	.:.:.:.:.:.:.	.:.:.:.:.:.:.	.:.:.:.:.:.:.	.:.:.:.:.:.:.	.:.:.:.:.:.:.	.:.:.:.:.:.:.	.:.:.:.:.:.:.
	2	145348	A	C	missense variant|MODERATE|Asp -> Glu	.:.:.:.:.:.:.	.:.:.:.:.:.:.	.:.:.:.:.:.:.	.:.:.:.:.:.:.	.:.:.:.:.:.:.	.:.:.:.:.:.:.	.:.:.:.:.:.:.	.:.:.:.:.:.:.	Present	Present	Present	Present	Present	Present	Present	.:.:.:.:.:.:.	.:.:.:.:.:.:.	Present	Present	.:.:.:.:.:.:.	Present	.:.:.:.:.:.:.	.:.:.:.:.:.:.	.:.:.:.:.:.:.	.:.:.:.:.:.:.	.:.:.:.:.:.:.	.:.:.:.:.:.:.	.:.:.:.:.:.:.	.:.:.:.:.:.:.	.:.:.:.:.:.:.	.:.:.:.:.:.:.	.:.:.:.:.:.:.	.:.:.:.:.:.:.	.:.:.:.:.:.:.	.:.:.:.:.:.:.	.:.:.:.:.:.:.	.:.:.:.:.:.:.	.:.:.:.:.:.:.	.:.:.:.:.:.:.	.:.:.:.:.:.:.	.:.:.:.:.:.:.	.:.:.:.:.:.:.	.:.:.:.:.:.:.	.:.:.:.:.:.:.
	2	145421	G	A	missense variant|MODERATE|Pro -> Leu	Present	Present	Present	Present	Present	Present	Present	Present	.:.:.:.:.:.:.	.:.:.:.:.:.:.	.:.:.:.:.:.:.	.:.:.:.:.:.:.	.:.:.:.:.:.:.	.:.:.:.:.:.:.	.:.:.:.:.:.:.	Present	.:.:.:.:.:.:.	.:.:.:.:.:.:.	.:.:.:.:.:.:.	Present	.:.:.:.:.:.:.	Present	Present	Present	Present	Present	Present	Present	Present	Present	.:.:.:.:.:.:.	.:.:.:.:.:.:.	Present	.:.:.:.:.:.:.	Present	Present	Present	.:.:.:.:.:.:.	.:.:.:.:.:.:.	Present	Present	Present	Present	.:.:.:.:.:.:.
	2	145465	A	T	missense variant|MODERATE|Asp -> Glu	.:.:.:.:.:.:.	.:.:.:.:.:.:.	.:.:.:.:.:.:.	.:.:.:.:.:.:.	.:.:.:.:.:.:.	.:.:.:.:.:.:.	.:.:.:.:.:.:.	.:.:.:.:.:.:.	.:.:.:.:.:.:.	.:.:.:.:.:.:.	.:.:.:.:.:.:.	.:.:.:.:.:.:.	.:.:.:.:.:.:.	.:.:.:.:.:.:.	.:.:.:.:.:.:.	.:.:.:.:.:.:.	.:.:.:.:.:.:.	.:.:.:.:.:.:.	.:.:.:.:.:.:.	Present	.:.:.:.:.:.:.	.:.:.:.:.:.:.	.:.:.:.:.:.:.	.:.:.:.:.:.:.	.:.:.:.:.:.:.	.:.:.:.:.:.:.	.:.:.:.:.:.:.	.:.:.:.:.:.:.	.:.:.:.:.:.:.	.:.:.:.:.:.:.	.:.:.:.:.:.:.	.:.:.:.:.:.:.	.:.:.:.:.:.:.	.:.:.:.:.:.:.	.:.:.:.:.:.:.	.:.:.:.:.:.:.	.:.:.:.:.:.:.	.:.:.:.:.:.:.	.:.:.:.:.:.:.	.:.:.:.:.:.:.	.:.:.:.:.:.:.	.:.:.:.:.:.:.	Present	.:.:.:.:.:.:.
	2	145540	A	C	synonymous variant|LOW	.:.:.:.:.:.:.	.:.:.:.:.:.:.	.:.:.:.:.:.:.	.:.:.:.:.:.:.	.:.:.:.:.:.:.	.:.:.:.:.:.:.	.:.:.:.:.:.:.	.:.:.:.:.:.:.	Present	Present	Present	Present	Present	Present	Present	.:.:.:.:.:.:.	.:.:.:.:.:.:.	Present	Present	.:.:.:.:.:.:.	Present	.:.:.:.:.:.:.	.:.:.:.:.:.:.	.:.:.:.:.:.:.	.:.:.:.:.:.:.	.:.:.:.:.:.:.	.:.:.:.:.:.:.	.:.:.:.:.:.:.	.:.:.:.:.:.:.	.:.:.:.:.:.:.	.:.:.:.:.:.:.	.:.:.:.:.:.:.	.:.:.:.:.:.:.	.:.:.:.:.:.:.	.:.:.:.:.:.:.	.:.:.:.:.:.:.	.:.:.:.:.:.:.	.:.:.:.:.:.:.	.:.:.:.:.:.:.	.:.:.:.:.:.:.	.:.:.:.:.:.:.	.:.:.:.:.:.:.	.:.:.:.:.:.:.	.:.:.:.:.:.:.
	2	145573	T	C	synonymous variant|LOW	Present	Present	Present	Present	Present	Present	Present	Present	Present	Present	Present	Present	Present	Present	Present	Present	Present	Present	Present	Present	Present	Present	Present	Present	Present	Present	Present	Present	Present	Present	.:.:.:.:.:.:.	.:.:.:.:.:.:.	Present	.:.:.:.:.:.:.	Present	Present	Present	Present	.:.:.:.:.:.:.	Present	Present	Present	Present	Present
	2	145750	T	G	synonymous variant|LOW	.:.:.:.:.:.:.	.:.:.:.:.:.:.	.:.:.:.:.:.:.	.:.:.:.:.:.:.	.:.:.:.:.:.:.	.:.:.:.:.:.:.	.:.:.:.:.:.:.	.:.:.:.:.:.:.	Present	Present	Present	Present	Present	Present	Present	.:.:.:.:.:.:.	.:.:.:.:.:.:.	.:.:.:.:.:.:.	Present	.:.:.:.:.:.:.	Present	.:.:.:.:.:.:.	.:.:.:.:.:.:.	.:.:.:.:.:.:.	.:.:.:.:.:.:.	.:.:.:.:.:.:.	.:.:.:.:.:.:.	.:.:.:.:.:.:.	.:.:.:.:.:.:.	.:.:.:.:.:.:.	.:.:.:.:.:.:.	.:.:.:.:.:.:.	.:.:.:.:.:.:.	.:.:.:.:.:.:.	.:.:.:.:.:.:.	.:.:.:.:.:.:.	.:.:.:.:.:.:.	.:.:.:.:.:.:.	.:.:.:.:.:.:.	.:.:.:.:.:.:.	.:.:.:.:.:.:.	.:.:.:.:.:.:.	.:.:.:.:.:.:.	.:.:.:.:.:.:.
	2	145802	A	G	missense variant|MODERATE|Leu -> Ser	.:.:.:.:.:.:.	.:.:.:.:.:.:.	.:.:.:.:.:.:.	.:.:.:.:.:.:.	.:.:.:.:.:.:.	Present	.:.:.:.:.:.:.	.:.:.:.:.:.:.	.:.:.:.:.:.:.	.:.:.:.:.:.:.	.:.:.:.:.:.:.	.:.:.:.:.:.:.	.:.:.:.:.:.:.	.:.:.:.:.:.:.	.:.:.:.:.:.:.	Present	.:.:.:.:.:.:.	.:.:.:.:.:.:.	.:.:.:.:.:.:.	.:.:.:.:.:.:.	.:.:.:.:.:.:.	.:.:.:.:.:.:.	.:.:.:.:.:.:.	.:.:.:.:.:.:.	.:.:.:.:.:.:.	.:.:.:.:.:.:.	.:.:.:.:.:.:.	.:.:.:.:.:.:.	.:.:.:.:.:.:.	.:.:.:.:.:.:.	.:.:.:.:.:.:.	.:.:.:.:.:.:.	.:.:.:.:.:.:.	.:.:.:.:.:.:.	.:.:.:.:.:.:.	.:.:.:.:.:.:.	.:.:.:.:.:.:.	.:.:.:.:.:.:.	.:.:.:.:.:.:.	.:.:.:.:.:.:.	.:.:.:.:.:.:.	.:.:.:.:.:.:.	.:.:.:.:.:.:.	.:.:.:.:.:.:.
	2	145816	A	G	synonymous variant|LOW	.:.:.:.:.:.:.	.:.:.:.:.:.:.	.:.:.:.:.:.:.	.:.:.:.:.:.:.	.:.:.:.:.:.:.	.:.:.:.:.:.:.	.:.:.:.:.:.:.	.:.:.:.:.:.:.	Present	Present	Present	Present	Present	Present	Present	.:.:.:.:.:.:.	.:.:.:.:.:.:.	Present	Present	.:.:.:.:.:.:.	Present	.:.:.:.:.:.:.	.:.:.:.:.:.:.	.:.:.:.:.:.:.	.:.:.:.:.:.:.	.:.:.:.:.:.:.	.:.:.:.:.:.:.	.:.:.:.:.:.:.	.:.:.:.:.:.:.	.:.:.:.:.:.:.	.:.:.:.:.:.:.	.:.:.:.:.:.:.	.:.:.:.:.:.:.	.:.:.:.:.:.:.	.:.:.:.:.:.:.	.:.:.:.:.:.:.	.:.:.:.:.:.:.	.:.:.:.:.:.:.	.:.:.:.:.:.:.	.:.:.:.:.:.:.	.:.:.:.:.:.:.	.:.:.:.:.:.:.	.:.:.:.:.:.:.	.:.:.:.:.:.:.
	2	145934	T	C	missense variant|MODERATE|Asp -> Gly	Present	Present	Present	Present	Present	Present	Present	Present	Present	Present	Present	Present	Present	Present	Present	Present	.:.:.:.:.:.:.	Present	Present	Present	Present	Present	Present	Present	Present	Present	Present	Present	Present	Present	.:.:.:.:.:.:.	.:.:.:.:.:.:.	Present	.:.:.:.:.:.:.	Present	Present	Present	.:.:.:.:.:.:.	.:.:.:.:.:.:.	Present	Present	Present	Present	.:.:.:.:.:.:.
	2	146017	T	A	missense variant|MODERATE|Glu -> Asp	.:.:.:.:.:.:.	.:.:.:.:.:.:.	.:.:.:.:.:.:.	.:.:.:.:.:.:.	.:.:.:.:.:.:.	.:.:.:.:.:.:.	.:.:.:.:.:.:.	.:.:.:.:.:.:.	.:.:.:.:.:.:.	.:.:.:.:.:.:.	.:.:.:.:.:.:.	.:.:.:.:.:.:.	.:.:.:.:.:.:.	.:.:.:.:.:.:.	.:.:.:.:.:.:.	.:.:.:.:.:.:.	.:.:.:.:.:.:.	Present	.:.:.:.:.:.:.	.:.:.:.:.:.:.	.:.:.:.:.:.:.	.:.:.:.:.:.:.	.:.:.:.:.:.:.	.:.:.:.:.:.:.	.:.:.:.:.:.:.	.:.:.:.:.:.:.	.:.:.:.:.:.:.	.:.:.:.:.:.:.	.:.:.:.:.:.:.	.:.:.:.:.:.:.	.:.:.:.:.:.:.	.:.:.:.:.:.:.	.:.:.:.:.:.:.	.:.:.:.:.:.:.	.:.:.:.:.:.:.	.:.:.:.:.:.:.	.:.:.:.:.:.:.	.:.:.:.:.:.:.	.:.:.:.:.:.:.	.:.:.:.:.:.:.	.:.:.:.:.:.:.	.:.:.:.:.:.:.	.:.:.:.:.:.:.	.:.:.:.:.:.:.
	2	146019	C	G	missense variant|MODERATE|Glu -> Gln	.:.:.:.:.:.:.	.:.:.:.:.:.:.	.:.:.:.:.:.:.	.:.:.:.:.:.:.	.:.:.:.:.:.:.	.:.:.:.:.:.:.	.:.:.:.:.:.:.	.:.:.:.:.:.:.	.:.:.:.:.:.:.	.:.:.:.:.:.:.	.:.:.:.:.:.:.	.:.:.:.:.:.:.	.:.:.:.:.:.:.	.:.:.:.:.:.:.	.:.:.:.:.:.:.	.:.:.:.:.:.:.	.:.:.:.:.:.:.	.:.:.:.:.:.:.	.:.:.:.:.:.:.	.:.:.:.:.:.:.	.:.:.:.:.:.:.	.:.:.:.:.:.:.	.:.:.:.:.:.:.	.:.:.:.:.:.:.	.:.:.:.:.:.:.	.:.:.:.:.:.:.	.:.:.:.:.:.:.	.:.:.:.:.:.:.	.:.:.:.:.:.:.	.:.:.:.:.:.:.	.:.:.:.:.:.:.	.:.:.:.:.:.:.	.:.:.:.:.:.:.	.:.:.:.:.:.:.	.:.:.:.:.:.:.	Present	.:.:.:.:.:.:.	.:.:.:.:.:.:.	.:.:.:.:.:.:.	Present	.:.:.:.:.:.:.	.:.:.:.:.:.:.	.:.:.:.:.:.:.	.:.:.:.:.:.:.
	2	146107	G	A	synonymous variant|LOW	.:.:.:.:.:.:.	.:.:.:.:.:.:.	.:.:.:.:.:.:.	.:.:.:.:.:.:.	.:.:.:.:.:.:.	.:.:.:.:.:.:.	.:.:.:.:.:.:.	.:.:.:.:.:.:.	.:.:.:.:.:.:.	.:.:.:.:.:.:.	.:.:.:.:.:.:.	.:.:.:.:.:.:.	.:.:.:.:.:.:.	.:.:.:.:.:.:.	.:.:.:.:.:.:.	.:.:.:.:.:.:.	.:.:.:.:.:.:.	.:.:.:.:.:.:.	.:.:.:.:.:.:.	.:.:.:.:.:.:.	.:.:.:.:.:.:.	.:.:.:.:.:.:.	.:.:.:.:.:.:.	.:.:.:.:.:.:.	.:.:.:.:.:.:.	.:.:.:.:.:.:.	.:.:.:.:.:.:.	.:.:.:.:.:.:.	.:.:.:.:.:.:.	.:.:.:.:.:.:.	.:.:.:.:.:.:.	.:.:.:.:.:.:.	.:.:.:.:.:.:.	.:.:.:.:.:.:.	.:.:.:.:.:.:.	.:.:.:.:.:.:.	.:.:.:.:.:.:.	.:.:.:.:.:.:.	.:.:.:.:.:.:.	.:.:.:.:.:.:.	.:.:.:.:.:.:.	.:.:.:.:.:.:.	.:.:.:.:.:.:.	.:.:.:.:.:.:.
	2	146188	G	A	synonymous variant|LOW	.:.:.:.:.:.:.	.:.:.:.:.:.:.	.:.:.:.:.:.:.	.:.:.:.:.:.:.	.:.:.:.:.:.:.	.:.:.:.:.:.:.	.:.:.:.:.:.:.	.:.:.:.:.:.:.	Present	Present	Present	Present	Present	Present	Present	.:.:.:.:.:.:.	.:.:.:.:.:.:.	Present	Present	.:.:.:.:.:.:.	Present	.:.:.:.:.:.:.	.:.:.:.:.:.:.	.:.:.:.:.:.:.	.:.:.:.:.:.:.	.:.:.:.:.:.:.	.:.:.:.:.:.:.	.:.:.:.:.:.:.	.:.:.:.:.:.:.	.:.:.:.:.:.:.	.:.:.:.:.:.:.	.:.:.:.:.:.:.	.:.:.:.:.:.:.	.:.:.:.:.:.:.	.:.:.:.:.:.:.	.:.:.:.:.:.:.	.:.:.:.:.:.:.	.:.:.:.:.:.:.	.:.:.:.:.:.:.	.:.:.:.:.:.:.	.:.:.:.:.:.:.	.:.:.:.:.:.:.	.:.:.:.:.:.:.	.:.:.:.:.:.:.
	2	146235	T	C	missense variant|MODERATE|Asn -> Asp	Present	Present	Present	Present	Present	Present	Present	Present	Present	Present	Present	Present	Present	Present	Present	Present	Present	Present	Present	Present	Present	Present	Present	Present	Present	Present	Present	Present	Present	Present	Present	Present	Present	Present	Present	Present	Present	Present	Present	Present	Present	Present	Present	Present
	2	146364	G	A	stop gained|HIGH|Gln -> Stop	.:.:.:.:.:.:.	.:.:.:.:.:.:.	.:.:.:.:.:.:.	.:.:.:.:.:.:.	.:.:.:.:.:.:.	.:.:.:.:.:.:.	.:.:.:.:.:.:.	.:.:.:.:.:.:.	.:.:.:.:.:.:.	.:.:.:.:.:.:.	.:.:.:.:.:.:.	.:.:.:.:.:.:.	.:.:.:.:.:.:.	.:.:.:.:.:.:.	.:.:.:.:.:.:.	.:.:.:.:.:.:.	.:.:.:.:.:.:.	.:.:.:.:.:.:.	.:.:.:.:.:.:.	.:.:.:.:.:.:.	.:.:.:.:.:.:.	.:.:.:.:.:.:.	.:.:.:.:.:.:.	.:.:.:.:.:.:.	.:.:.:.:.:.:.	.:.:.:.:.:.:.	.:.:.:.:.:.:.	.:.:.:.:.:.:.	.:.:.:.:.:.:.	.:.:.:.:.:.:.	.:.:.:.:.:.:.	.:.:.:.:.:.:.	.:.:.:.:.:.:.	.:.:.:.:.:.:.	.:.:.:.:.:.:.	.:.:.:.:.:.:.	.:.:.:.:.:.:.	.:.:.:.:.:.:.	.:.:.:.:.:.:.	.:.:.:.:.:.:.	.:.:.:.:.:.:.	.:.:.:.:.:.:.	.:.:.:.:.:.:.	.:.:.:.:.:.:.
	2	146393	A	G	missense variant|MODERATE|Leu -> Ser	.:.:.:.:.:.:.	.:.:.:.:.:.:.	.:.:.:.:.:.:.	.:.:.:.:.:.:.	.:.:.:.:.:.:.	.:.:.:.:.:.:.	.:.:.:.:.:.:.	.:.:.:.:.:.:.	.:.:.:.:.:.:.	.:.:.:.:.:.:.	.:.:.:.:.:.:.	Present	.:.:.:.:.:.:.	Present	.:.:.:.:.:.:.	.:.:.:.:.:.:.	.:.:.:.:.:.:.	.:.:.:.:.:.:.	.:.:.:.:.:.:.	.:.:.:.:.:.:.	.:.:.:.:.:.:.	.:.:.:.:.:.:.	.:.:.:.:.:.:.	.:.:.:.:.:.:.	.:.:.:.:.:.:.	.:.:.:.:.:.:.	.:.:.:.:.:.:.	.:.:.:.:.:.:.	.:.:.:.:.:.:.	.:.:.:.:.:.:.	.:.:.:.:.:.:.	.:.:.:.:.:.:.	.:.:.:.:.:.:.	.:.:.:.:.:.:.	.:.:.:.:.:.:.	.:.:.:.:.:.:.	.:.:.:.:.:.:.	.:.:.:.:.:.:.	.:.:.:.:.:.:.	.:.:.:.:.:.:.	.:.:.:.:.:.:.	.:.:.:.:.:.:.	.:.:.:.:.:.:.	.:.:.:.:.:.:.
	2	146424	A	G	missense variant|MODERATE|Tyr -> His	.:.:.:.:.:.:.	.:.:.:.:.:.:.	.:.:.:.:.:.:.	.:.:.:.:.:.:.	.:.:.:.:.:.:.	.:.:.:.:.:.:.	.:.:.:.:.:.:.	.:.:.:.:.:.:.	.:.:.:.:.:.:.	.:.:.:.:.:.:.	.:.:.:.:.:.:.	.:.:.:.:.:.:.	.:.:.:.:.:.:.	.:.:.:.:.:.:.	.:.:.:.:.:.:.	.:.:.:.:.:.:.	.:.:.:.:.:.:.	.:.:.:.:.:.:.	.:.:.:.:.:.:.	.:.:.:.:.:.:.	.:.:.:.:.:.:.	.:.:.:.:.:.:.	.:.:.:.:.:.:.	.:.:.:.:.:.:.	.:.:.:.:.:.:.	.:.:.:.:.:.:.	.:.:.:.:.:.:.	.:.:.:.:.:.:.	.:.:.:.:.:.:.	.:.:.:.:.:.:.	.:.:.:.:.:.:.	.:.:.:.:.:.:.	.:.:.:.:.:.:.	.:.:.:.:.:.:.	.:.:.:.:.:.:.	.:.:.:.:.:.:.	.:.:.:.:.:.:.	.:.:.:.:.:.:.	.:.:.:.:.:.:.	.:.:.:.:.:.:.	.:.:.:.:.:.:.	.:.:.:.:.:.:.	.:.:.:.:.:.:.	.:.:.:.:.:.:.
	2	146469	C	T	missense variant|MODERATE|Gly -> Ser	Present	Present	Present	Present	Present	.:.:.:.:.:.:.	Present	Present	.:.:.:.:.:.:.	.:.:.:.:.:.:.	.:.:.:.:.:.:.	.:.:.:.:.:.:.	.:.:.:.:.:.:.	.:.:.:.:.:.:.	.:.:.:.:.:.:.	.:.:.:.:.:.:.	.:.:.:.:.:.:.	.:.:.:.:.:.:.	.:.:.:.:.:.:.	.:.:.:.:.:.:.	.:.:.:.:.:.:.	Present	Present	Present	Present	Present	Present	Present	Present	Present	.:.:.:.:.:.:.	.:.:.:.:.:.:.	Present	.:.:.:.:.:.:.	Present	Present	Present	.:.:.:.:.:.:.	.:.:.:.:.:.:.	Present	Present	Present	.:.:.:.:.:.:.	.:.:.:.:.:.:.
	2	146473	A	C	missense variant|MODERATE|Cys -> Trp	.:.:.:.:.:.:.	.:.:.:.:.:.:.	.:.:.:.:.:.:.	.:.:.:.:.:.:.	.:.:.:.:.:.:.	.:.:.:.:.:.:.	.:.:.:.:.:.:.	.:.:.:.:.:.:.	.:.:.:.:.:.:.	.:.:.:.:.:.:.	.:.:.:.:.:.:.	.:.:.:.:.:.:.	.:.:.:.:.:.:.	.:.:.:.:.:.:.	.:.:.:.:.:.:.	.:.:.:.:.:.:.	.:.:.:.:.:.:.	.:.:.:.:.:.:.	.:.:.:.:.:.:.	.:.:.:.:.:.:.	.:.:.:.:.:.:.	.:.:.:.:.:.:.	.:.:.:.:.:.:.	.:.:.:.:.:.:.	.:.:.:.:.:.:.	.:.:.:.:.:.:.	.:.:.:.:.:.:.	.:.:.:.:.:.:.	.:.:.:.:.:.:.	.:.:.:.:.:.:.	Present	.:.:.:.:.:.:.	.:.:.:.:.:.:.	.:.:.:.:.:.:.	.:.:.:.:.:.:.	.:.:.:.:.:.:.	.:.:.:.:.:.:.	.:.:.:.:.:.:.	Present	.:.:.:.:.:.:.	.:.:.:.:.:.:.	.:.:.:.:.:.:.	.:.:.:.:.:.:.	.:.:.:.:.:.:.
	2	146554	C	G	missense variant|MODERATE|Glu -> Asp	.:.:.:.:.:.:.	.:.:.:.:.:.:.	.:.:.:.:.:.:.	.:.:.:.:.:.:.	.:.:.:.:.:.:.	.:.:.:.:.:.:.	.:.:.:.:.:.:.	.:.:.:.:.:.:.	Present	Present	Present	Present	Present	Present	Present	.:.:.:.:.:.:.	.:.:.:.:.:.:.	.:.:.:.:.:.:.	Present	.:.:.:.:.:.:.	Present	.:.:.:.:.:.:.	.:.:.:.:.:.:.	.:.:.:.:.:.:.	.:.:.:.:.:.:.	.:.:.:.:.:.:.	.:.:.:.:.:.:.	.:.:.:.:.:.:.	.:.:.:.:.:.:.	.:.:.:.:.:.:.	.:.:.:.:.:.:.	.:.:.:.:.:.:.	.:.:.:.:.:.:.	.:.:.:.:.:.:.	.:.:.:.:.:.:.	.:.:.:.:.:.:.	.:.:.:.:.:.:.	.:.:.:.:.:.:.	.:.:.:.:.:.:.	.:.:.:.:.:.:.	.:.:.:.:.:.:.	.:.:.:.:.:.:.	.:.:.:.:.:.:.	.:.:.:.:.:.:.
	2	146654	G	A	missense variant|MODERATE|Ser -> Phe	.:.:.:.:.:.:.	.:.:.:.:.:.:.	.:.:.:.:.:.:.	.:.:.:.:.:.:.	.:.:.:.:.:.:.	.:.:.:.:.:.:.	.:.:.:.:.:.:.	.:.:.:.:.:.:.	.:.:.:.:.:.:.	.:.:.:.:.:.:.	.:.:.:.:.:.:.	.:.:.:.:.:.:.	.:.:.:.:.:.:.	.:.:.:.:.:.:.	.:.:.:.:.:.:.	.:.:.:.:.:.:.	.:.:.:.:.:.:.	.:.:.:.:.:.:.	.:.:.:.:.:.:.	.:.:.:.:.:.:.	.:.:.:.:.:.:.	.:.:.:.:.:.:.	.:.:.:.:.:.:.	.:.:.:.:.:.:.	.:.:.:.:.:.:.	.:.:.:.:.:.:.	.:.:.:.:.:.:.	.:.:.:.:.:.:.	.:.:.:.:.:.:.	.:.:.:.:.:.:.	.:.:.:.:.:.:.	.:.:.:.:.:.:.	.:.:.:.:.:.:.	.:.:.:.:.:.:.	.:.:.:.:.:.:.	.:.:.:.:.:.:.	.:.:.:.:.:.:.	.:.:.:.:.:.:.	.:.:.:.:.:.:.	.:.:.:.:.:.:.	.:.:.:.:.:.:.	.:.:.:.:.:.:.	.:.:.:.:.:.:.	.:.:.:.:.:.:.
	2	146750	T	C	missense variant|MODERATE|His -> Arg	.:.:.:.:.:.:.	.:.:.:.:.:.:.	.:.:.:.:.:.:.	.:.:.:.:.:.:.	.:.:.:.:.:.:.	.:.:.:.:.:.:.	.:.:.:.:.:.:.	.:.:.:.:.:.:.	.:.:.:.:.:.:.	.:.:.:.:.:.:.	.:.:.:.:.:.:.	.:.:.:.:.:.:.	.:.:.:.:.:.:.	.:.:.:.:.:.:.	.:.:.:.:.:.:.	.:.:.:.:.:.:.	.:.:.:.:.:.:.	Present	.:.:.:.:.:.:.	.:.:.:.:.:.:.	.:.:.:.:.:.:.	.:.:.:.:.:.:.	.:.:.:.:.:.:.	.:.:.:.:.:.:.	.:.:.:.:.:.:.	.:.:.:.:.:.:.	.:.:.:.:.:.:.	.:.:.:.:.:.:.	.:.:.:.:.:.:.	.:.:.:.:.:.:.	.:.:.:.:.:.:.	.:.:.:.:.:.:.	.:.:.:.:.:.:.	.:.:.:.:.:.:.	.:.:.:.:.:.:.	.:.:.:.:.:.:.	.:.:.:.:.:.:.	.:.:.:.:.:.:.	.:.:.:.:.:.:.	.:.:.:.:.:.:.	.:.:.:.:.:.:.	.:.:.:.:.:.:.	.:.:.:.:.:.:.	.:.:.:.:.:.:.
	2	147229	T	C	synonymous variant|LOW	.:.:.:.:.:.:.	.:.:.:.:.:.:.	.:.:.:.:.:.:.	.:.:.:.:.:.:.	.:.:.:.:.:.:.	.:.:.:.:.:.:.	.:.:.:.:.:.:.	.:.:.:.:.:.:.	Present	Present	Present	Present	Present	Present	Present	.:.:.:.:.:.:.	.:.:.:.:.:.:.	Present	Present	.:.:.:.:.:.:.	Present	.:.:.:.:.:.:.	.:.:.:.:.:.:.	.:.:.:.:.:.:.	.:.:.:.:.:.:.	.:.:.:.:.:.:.	.:.:.:.:.:.:.	.:.:.:.:.:.:.	.:.:.:.:.:.:.	.:.:.:.:.:.:.	.:.:.:.:.:.:.	.:.:.:.:.:.:.	.:.:.:.:.:.:.	.:.:.:.:.:.:.	.:.:.:.:.:.:.	.:.:.:.:.:.:.	.:.:.:.:.:.:.	.:.:.:.:.:.:.	.:.:.:.:.:.:.	.:.:.:.:.:.:.	.:.:.:.:.:.:.	.:.:.:.:.:.:.	.:.:.:.:.:.:.	.:.:.:.:.:.:.
	2	147363	T	C	missense variant|MODERATE|Arg -> Gly	Present	Present	Present	Present	Present	Present	Present	Present	Present	Present	Present	Present	Present	Present	Present	Present	.:.:.:.:.:.:.	Present	Present	Present	Present	Present	Present	Present	Present	Present	Present	Present	Present	Present	.:.:.:.:.:.:.	.:.:.:.:.:.:.	Present	.:.:.:.:.:.:.	Present	Present	Present	.:.:.:.:.:.:.	.:.:.:.:.:.:.	Present	Present	Present	Present	.:.:.:.:.:.:.
	2	147396	C	G	missense variant|MODERATE|Ala -> Pro	Present	Present	Present	Present	Present	Present	Present	Present	Present	Present	Present	Present	Present	Present	Present	Present	.:.:.:.:.:.:.	Present	Present	Present	Present	Present	Present	Present	Present	Present	Present	Present	Present	Present	.:.:.:.:.:.:.	.:.:.:.:.:.:.	Present	.:.:.:.:.:.:.	Present	Present	Present	Present	.:.:.:.:.:.:.	Present	Present	Present	Present	Present
	2	147528	C	T	splice region variant&intron variant|LOW	.:.:.:.:.:.:.	.:.:.:.:.:.:.	.:.:.:.:.:.:.	.:.:.:.:.:.:.	.:.:.:.:.:.:.	Present	.:.:.:.:.:.:.	.:.:.:.:.:.:.	.:.:.:.:.:.:.	.:.:.:.:.:.:.	.:.:.:.:.:.:.	.:.:.:.:.:.:.	.:.:.:.:.:.:.	.:.:.:.:.:.:.	.:.:.:.:.:.:.	Present	.:.:.:.:.:.:.	.:.:.:.:.:.:.	.:.:.:.:.:.:.	.:.:.:.:.:.:.	.:.:.:.:.:.:.	.:.:.:.:.:.:.	.:.:.:.:.:.:.	.:.:.:.:.:.:.	.:.:.:.:.:.:.	.:.:.:.:.:.:.	.:.:.:.:.:.:.	.:.:.:.:.:.:.	.:.:.:.:.:.:.	.:.:.:.:.:.:.	.:.:.:.:.:.:.	.:.:.:.:.:.:.	.:.:.:.:.:.:.	.:.:.:.:.:.:.	.:.:.:.:.:.:.	.:.:.:.:.:.:.	.:.:.:.:.:.:.	.:.:.:.:.:.:.	.:.:.:.:.:.:.	.:.:.:.:.:.:.	.:.:.:.:.:.:.	.:.:.:.:.:.:.	.:.:.:.:.:.:.	.:.:.:.:.:.:.
	2	147619	G	A	synonymous variant|LOW	.:.:.:.:.:.:.	.:.:.:.:.:.:.	.:.:.:.:.:.:.	.:.:.:.:.:.:.	.:.:.:.:.:.:.	.:.:.:.:.:.:.	.:.:.:.:.:.:.	.:.:.:.:.:.:.	Present	Present	Present	Present	Present	Present	Present	.:.:.:.:.:.:.	.:.:.:.:.:.:.	.:.:.:.:.:.:.	Present	.:.:.:.:.:.:.	Present	.:.:.:.:.:.:.	.:.:.:.:.:.:.	.:.:.:.:.:.:.	.:.:.:.:.:.:.	.:.:.:.:.:.:.	.:.:.:.:.:.:.	.:.:.:.:.:.:.	.:.:.:.:.:.:.	.:.:.:.:.:.:.	.:.:.:.:.:.:.	.:.:.:.:.:.:.	.:.:.:.:.:.:.	.:.:.:.:.:.:.	.:.:.:.:.:.:.	.:.:.:.:.:.:.	.:.:.:.:.:.:.	.:.:.:.:.:.:.	.:.:.:.:.:.:.	.:.:.:.:.:.:.	.:.:.:.:.:.:.	.:.:.:.:.:.:.	.:.:.:.:.:.:.	.:.:.:.:.:.:.
	2	147641	G	A	missense variant|MODERATE|Ser -> Phe	.:.:.:.:.:.:.	.:.:.:.:.:.:.	.:.:.:.:.:.:.	.:.:.:.:.:.:.	.:.:.:.:.:.:.	.:.:.:.:.:.:.	.:.:.:.:.:.:.	.:.:.:.:.:.:.	.:.:.:.:.:.:.	.:.:.:.:.:.:.	.:.:.:.:.:.:.	.:.:.:.:.:.:.	.:.:.:.:.:.:.	.:.:.:.:.:.:.	.:.:.:.:.:.:.	.:.:.:.:.:.:.	.:.:.:.:.:.:.	.:.:.:.:.:.:.	.:.:.:.:.:.:.	.:.:.:.:.:.:.	.:.:.:.:.:.:.	.:.:.:.:.:.:.	.:.:.:.:.:.:.	.:.:.:.:.:.:.	.:.:.:.:.:.:.	Present	.:.:.:.:.:.:.	.:.:.:.:.:.:.	.:.:.:.:.:.:.	.:.:.:.:.:.:.	.:.:.:.:.:.:.	.:.:.:.:.:.:.	.:.:.:.:.:.:.	.:.:.:.:.:.:.	.:.:.:.:.:.:.	.:.:.:.:.:.:.	.:.:.:.:.:.:.	.:.:.:.:.:.:.	.:.:.:.:.:.:.	.:.:.:.:.:.:.	.:.:.:.:.:.:.	.:.:.:.:.:.:.	.:.:.:.:.:.:.	.:.:.:.:.:.:.
	2	147644	A	C	missense variant|MODERATE|Phe -> Cys	.:.:.:.:.:.:.	.:.:.:.:.:.:.	.:.:.:.:.:.:.	.:.:.:.:.:.:.	.:.:.:.:.:.:.	.:.:.:.:.:.:.	.:.:.:.:.:.:.	.:.:.:.:.:.:.	.:.:.:.:.:.:.	.:.:.:.:.:.:.	.:.:.:.:.:.:.	.:.:.:.:.:.:.	.:.:.:.:.:.:.	.:.:.:.:.:.:.	.:.:.:.:.:.:.	.:.:.:.:.:.:.	.:.:.:.:.:.:.	.:.:.:.:.:.:.	.:.:.:.:.:.:.	.:.:.:.:.:.:.	.:.:.:.:.:.:.	.:.:.:.:.:.:.	.:.:.:.:.:.:.	.:.:.:.:.:.:.	.:.:.:.:.:.:.	.:.:.:.:.:.:.	.:.:.:.:.:.:.	.:.:.:.:.:.:.	.:.:.:.:.:.:.	.:.:.:.:.:.:.	.:.:.:.:.:.:.	.:.:.:.:.:.:.	.:.:.:.:.:.:.	.:.:.:.:.:.:.	.:.:.:.:.:.:.	.:.:.:.:.:.:.	.:.:.:.:.:.:.	.:.:.:.:.:.:.	.:.:.:.:.:.:.	.:.:.:.:.:.:.	.:.:.:.:.:.:.	.:.:.:.:.:.:.	.:.:.:.:.:.:.	.:.:.:.:.:.:.
	2	147691	T	C	synonymous variant|LOW	.:.:.:.:.:.:.	.:.:.:.:.:.:.	.:.:.:.:.:.:.	.:.:.:.:.:.:.	.:.:.:.:.:.:.	.:.:.:.:.:.:.	.:.:.:.:.:.:.	.:.:.:.:.:.:.	.:.:.:.:.:.:.	.:.:.:.:.:.:.	.:.:.:.:.:.:.	.:.:.:.:.:.:.	.:.:.:.:.:.:.	.:.:.:.:.:.:.	.:.:.:.:.:.:.	.:.:.:.:.:.:.	.:.:.:.:.:.:.	.:.:.:.:.:.:.	.:.:.:.:.:.:.	.:.:.:.:.:.:.	.:.:.:.:.:.:.	.:.:.:.:.:.:.	.:.:.:.:.:.:.	.:.:.:.:.:.:.	.:.:.:.:.:.:.	.:.:.:.:.:.:.	.:.:.:.:.:.:.	.:.:.:.:.:.:.	.:.:.:.:.:.:.	.:.:.:.:.:.:.	.:.:.:.:.:.:.	Present	.:.:.:.:.:.:.	.:.:.:.:.:.:.	.:.:.:.:.:.:.	.:.:.:.:.:.:.	.:.:.:.:.:.:.	.:.:.:.:.:.:.	.:.:.:.:.:.:.	.:.:.:.:.:.:.	.:.:.:.:.:.:.	.:.:.:.:.:.:.	.:.:.:.:.:.:.	.:.:.:.:.:.:.
	2	147719	A	G	missense variant|MODERATE|Val -> Ala	Present	Present	Present	Present	Present	Present	Present	Present	.:.:.:.:.:.:.	.:.:.:.:.:.:.	.:.:.:.:.:.:.	.:.:.:.:.:.:.	.:.:.:.:.:.:.	.:.:.:.:.:.:.	.:.:.:.:.:.:.	Present	.:.:.:.:.:.:.	.:.:.:.:.:.:.	.:.:.:.:.:.:.	Present	.:.:.:.:.:.:.	Present	Present	Present	Present	Present	Present	Present	Present	Present	.:.:.:.:.:.:.	.:.:.:.:.:.:.	Present	.:.:.:.:.:.:.	Present	Present	Present	.:.:.:.:.:.:.	.:.:.:.:.:.:.	Present	Present	Present	Present	.:.:.:.:.:.:.
	2	147766	C	G	synonymous variant|LOW	.:.:.:.:.:.:.	.:.:.:.:.:.:.	.:.:.:.:.:.:.	.:.:.:.:.:.:.	.:.:.:.:.:.:.	Present	.:.:.:.:.:.:.	.:.:.:.:.:.:.	.:.:.:.:.:.:.	.:.:.:.:.:.:.	.:.:.:.:.:.:.	.:.:.:.:.:.:.	.:.:.:.:.:.:.	.:.:.:.:.:.:.	.:.:.:.:.:.:.	.:.:.:.:.:.:.	.:.:.:.:.:.:.	.:.:.:.:.:.:.	.:.:.:.:.:.:.	.:.:.:.:.:.:.	.:.:.:.:.:.:.	.:.:.:.:.:.:.	.:.:.:.:.:.:.	.:.:.:.:.:.:.	.:.:.:.:.:.:.	.:.:.:.:.:.:.	.:.:.:.:.:.:.	.:.:.:.:.:.:.	.:.:.:.:.:.:.	.:.:.:.:.:.:.	.:.:.:.:.:.:.	.:.:.:.:.:.:.	.:.:.:.:.:.:.	.:.:.:.:.:.:.	.:.:.:.:.:.:.	.:.:.:.:.:.:.	.:.:.:.:.:.:.	.:.:.:.:.:.:.	.:.:.:.:.:.:.	.:.:.:.:.:.:.	.:.:.:.:.:.:.	.:.:.:.:.:.:.	.:.:.:.:.:.:.	.:.:.:.:.:.:.
	2	147938	A	G	missense variant|MODERATE|Met -> Thr	.:.:.:.:.:.:.	.:.:.:.:.:.:.	.:.:.:.:.:.:.	.:.:.:.:.:.:.	.:.:.:.:.:.:.	Present	.:.:.:.:.:.:.	.:.:.:.:.:.:.	.:.:.:.:.:.:.	.:.:.:.:.:.:.	.:.:.:.:.:.:.	.:.:.:.:.:.:.	.:.:.:.:.:.:.	.:.:.:.:.:.:.	.:.:.:.:.:.:.	Present	.:.:.:.:.:.:.	.:.:.:.:.:.:.	.:.:.:.:.:.:.	Present	.:.:.:.:.:.:.	.:.:.:.:.:.:.	.:.:.:.:.:.:.	.:.:.:.:.:.:.	.:.:.:.:.:.:.	.:.:.:.:.:.:.	.:.:.:.:.:.:.	.:.:.:.:.:.:.	.:.:.:.:.:.:.	.:.:.:.:.:.:.	.:.:.:.:.:.:.	.:.:.:.:.:.:.	.:.:.:.:.:.:.	.:.:.:.:.:.:.	.:.:.:.:.:.:.	.:.:.:.:.:.:.	.:.:.:.:.:.:.	.:.:.:.:.:.:.	.:.:.:.:.:.:.	.:.:.:.:.:.:.	.:.:.:.:.:.:.	.:.:.:.:.:.:.	Present	.:.:.:.:.:.:.
	2	148073	G	A	missense variant|MODERATE|Ser -> Leu	.:.:.:.:.:.:.	.:.:.:.:.:.:.	.:.:.:.:.:.:.	.:.:.:.:.:.:.	.:.:.:.:.:.:.	.:.:.:.:.:.:.	.:.:.:.:.:.:.	.:.:.:.:.:.:.	.:.:.:.:.:.:.	.:.:.:.:.:.:.	.:.:.:.:.:.:.	.:.:.:.:.:.:.	.:.:.:.:.:.:.	.:.:.:.:.:.:.	.:.:.:.:.:.:.	.:.:.:.:.:.:.	.:.:.:.:.:.:.	.:.:.:.:.:.:.	.:.:.:.:.:.:.	Present	.:.:.:.:.:.:.	.:.:.:.:.:.:.	.:.:.:.:.:.:.	.:.:.:.:.:.:.	.:.:.:.:.:.:.	.:.:.:.:.:.:.	.:.:.:.:.:.:.	.:.:.:.:.:.:.	.:.:.:.:.:.:.	.:.:.:.:.:.:.	.:.:.:.:.:.:.	.:.:.:.:.:.:.	.:.:.:.:.:.:.	.:.:.:.:.:.:.	.:.:.:.:.:.:.	.:.:.:.:.:.:.	.:.:.:.:.:.:.	.:.:.:.:.:.:.	.:.:.:.:.:.:.	.:.:.:.:.:.:.	.:.:.:.:.:.:.	.:.:.:.:.:.:.	Present	.:.:.:.:.:.:.
	2	148237	G	A	synonymous variant|LOW	.:.:.:.:.:.:.	.:.:.:.:.:.:.	.:.:.:.:.:.:.	.:.:.:.:.:.:.	.:.:.:.:.:.:.	.:.:.:.:.:.:.	.:.:.:.:.:.:.	.:.:.:.:.:.:.	Present	Present	Present	Present	Present	Present	Present	.:.:.:.:.:.:.	.:.:.:.:.:.:.	Present	Present	.:.:.:.:.:.:.	Present	.:.:.:.:.:.:.	.:.:.:.:.:.:.	.:.:.:.:.:.:.	.:.:.:.:.:.:.	.:.:.:.:.:.:.	.:.:.:.:.:.:.	.:.:.:.:.:.:.	.:.:.:.:.:.:.	.:.:.:.:.:.:.	.:.:.:.:.:.:.	.:.:.:.:.:.:.	.:.:.:.:.:.:.	.:.:.:.:.:.:.	.:.:.:.:.:.:.	.:.:.:.:.:.:.	.:.:.:.:.:.:.	.:.:.:.:.:.:.	.:.:.:.:.:.:.	.:.:.:.:.:.:.	.:.:.:.:.:.:.	.:.:.:.:.:.:.	.:.:.:.:.:.:.	.:.:.:.:.:.:.
mpkA	4	3588222	G	A	Intron	.:.:.:.:.:.:.	.:.:.:.:.:.:.	.:.:.:.:.:.:.	.:.:.:.:.:.:.	.:.:.:.:.:.:.	Present	.:.:.:.:.:.:.	.:.:.:.:.:.:.	.:.:.:.:.:.:.	.:.:.:.:.:.:.	.:.:.:.:.:.:.	.:.:.:.:.:.:.	.:.:.:.:.:.:.	.:.:.:.:.:.:.	.:.:.:.:.:.:.	Present	Present	.:.:.:.:.:.:.	.:.:.:.:.:.:.	.:.:.:.:.:.:.	.:.:.:.:.:.:.	.:.:.:.:.:.:.	.:.:.:.:.:.:.	.:.:.:.:.:.:.	.:.:.:.:.:.:.	.:.:.:.:.:.:.	.:.:.:.:.:.:.	.:.:.:.:.:.:.	.:.:.:.:.:.:.	.:.:.:.:.:.:.	.:.:.:.:.:.:.	.:.:.:.:.:.:.	.:.:.:.:.:.:.	.:.:.:.:.:.:.	.:.:.:.:.:.:.	.:.:.:.:.:.:.	.:.:.:.:.:.:.	.:.:.:.:.:.:.	.:.:.:.:.:.:.	.:.:.:.:.:.:.	.:.:.:.:.:.:.	.:.:.:.:.:.:.	.:.:.:.:.:.:.	.:.:.:.:.:.:.
	4	3588361	C	T	synonymous variant|LOW	.:.:.:.:.:.:.	.:.:.:.:.:.:.	.:.:.:.:.:.:.	.:.:.:.:.:.:.	.:.:.:.:.:.:.	.:.:.:.:.:.:.	.:.:.:.:.:.:.	.:.:.:.:.:.:.	Present	Present	Present	Present	Present	Present	Present	.:.:.:.:.:.:.	.:.:.:.:.:.:.	Present	Present	.:.:.:.:.:.:.	Present	.:.:.:.:.:.:.	.:.:.:.:.:.:.	.:.:.:.:.:.:.	.:.:.:.:.:.:.	.:.:.:.:.:.:.	.:.:.:.:.:.:.	.:.:.:.:.:.:.	.:.:.:.:.:.:.	.:.:.:.:.:.:.	.:.:.:.:.:.:.	.:.:.:.:.:.:.	.:.:.:.:.:.:.	.:.:.:.:.:.:.	.:.:.:.:.:.:.	.:.:.:.:.:.:.	.:.:.:.:.:.:.	.:.:.:.:.:.:.	.:.:.:.:.:.:.	.:.:.:.:.:.:.	.:.:.:.:.:.:.	.:.:.:.:.:.:.	.:.:.:.:.:.:.	.:.:.:.:.:.:.
	4	3588388	G	A	synonymous variant|LOW	.:.:.:.:.:.:.	.:.:.:.:.:.:.	.:.:.:.:.:.:.	.:.:.:.:.:.:.	.:.:.:.:.:.:.	.:.:.:.:.:.:.	.:.:.:.:.:.:.	.:.:.:.:.:.:.	Present	Present	Present	Present	Present	Present	Present	.:.:.:.:.:.:.	.:.:.:.:.:.:.	Present	Present	.:.:.:.:.:.:.	Present	.:.:.:.:.:.:.	.:.:.:.:.:.:.	.:.:.:.:.:.:.	.:.:.:.:.:.:.	.:.:.:.:.:.:.	.:.:.:.:.:.:.	.:.:.:.:.:.:.	.:.:.:.:.:.:.	.:.:.:.:.:.:.	.:.:.:.:.:.:.	.:.:.:.:.:.:.	.:.:.:.:.:.:.	.:.:.:.:.:.:.	.:.:.:.:.:.:.	.:.:.:.:.:.:.	.:.:.:.:.:.:.	.:.:.:.:.:.:.	.:.:.:.:.:.:.	.:.:.:.:.:.:.	.:.:.:.:.:.:.	.:.:.:.:.:.:.	.:.:.:.:.:.:.	.:.:.:.:.:.:.
	4	3588694	G	A	synonymous variant|LOW	.:.:.:.:.:.:.	.:.:.:.:.:.:.	.:.:.:.:.:.:.	.:.:.:.:.:.:.	.:.:.:.:.:.:.	.:.:.:.:.:.:.	.:.:.:.:.:.:.	.:.:.:.:.:.:.	.:.:.:.:.:.:.	.:.:.:.:.:.:.	.:.:.:.:.:.:.	.:.:.:.:.:.:.	.:.:.:.:.:.:.	.:.:.:.:.:.:.	.:.:.:.:.:.:.	.:.:.:.:.:.:.	.:.:.:.:.:.:.	.:.:.:.:.:.:.	.:.:.:.:.:.:.	.:.:.:.:.:.:.	.:.:.:.:.:.:.	.:.:.:.:.:.:.	.:.:.:.:.:.:.	.:.:.:.:.:.:.	.:.:.:.:.:.:.	.:.:.:.:.:.:.	.:.:.:.:.:.:.	.:.:.:.:.:.:.	.:.:.:.:.:.:.	.:.:.:.:.:.:.	.:.:.:.:.:.:.	.:.:.:.:.:.:.	.:.:.:.:.:.:.	.:.:.:.:.:.:.	.:.:.:.:.:.:.	.:.:.:.:.:.:.	.:.:.:.:.:.:.	.:.:.:.:.:.:.	Present	.:.:.:.:.:.:.	.:.:.:.:.:.:.	.:.:.:.:.:.:.	.:.:.:.:.:.:.	.:.:.:.:.:.:.
	4	3588948	T	C	Intron	.:.:.:.:.:.:.	.:.:.:.:.:.:.	.:.:.:.:.:.:.	.:.:.:.:.:.:.	.:.:.:.:.:.:.	.:.:.:.:.:.:.	.:.:.:.:.:.:.	.:.:.:.:.:.:.	Present	Present	Present	Present	Present	Present	Present	.:.:.:.:.:.:.	.:.:.:.:.:.:.	Present	Present	.:.:.:.:.:.:.	Present	.:.:.:.:.:.:.	.:.:.:.:.:.:.	.:.:.:.:.:.:.	.:.:.:.:.:.:.	.:.:.:.:.:.:.	.:.:.:.:.:.:.	.:.:.:.:.:.:.	.:.:.:.:.:.:.	.:.:.:.:.:.:.	.:.:.:.:.:.:.	.:.:.:.:.:.:.	.:.:.:.:.:.:.	.:.:.:.:.:.:.	.:.:.:.:.:.:.	.:.:.:.:.:.:.	.:.:.:.:.:.:.	.:.:.:.:.:.:.	.:.:.:.:.:.:.	.:.:.:.:.:.:.	.:.:.:.:.:.:.	.:.:.:.:.:.:.	.:.:.:.:.:.:.	.:.:.:.:.:.:.
	4	3588978	T	C	splice region variant&intron variant|LOW	.:.:.:.:.:.:.	.:.:.:.:.:.:.	.:.:.:.:.:.:.	.:.:.:.:.:.:.	.:.:.:.:.:.:.	Present	.:.:.:.:.:.:.	.:.:.:.:.:.:.	Present	Present	Present	Present	Present	Present	Present	Present	Present	Present	Present	.:.:.:.:.:.:.	Present	.:.:.:.:.:.:.	.:.:.:.:.:.:.	.:.:.:.:.:.:.	.:.:.:.:.:.:.	.:.:.:.:.:.:.	.:.:.:.:.:.:.	.:.:.:.:.:.:.	.:.:.:.:.:.:.	.:.:.:.:.:.:.	.:.:.:.:.:.:.	.:.:.:.:.:.:.	.:.:.:.:.:.:.	.:.:.:.:.:.:.	.:.:.:.:.:.:.	.:.:.:.:.:.:.	.:.:.:.:.:.:.	.:.:.:.:.:.:.	.:.:.:.:.:.:.	.:.:.:.:.:.:.	.:.:.:.:.:.:.	.:.:.:.:.:.:.	.:.:.:.:.:.:.	.:.:.:.:.:.:.
	4	3589078	C	G	missense variant|MODERATE|Leu -> Val	.:.:.:.:.:.:.	.:.:.:.:.:.:.	.:.:.:.:.:.:.	.:.:.:.:.:.:.	.:.:.:.:.:.:.	.:.:.:.:.:.:.	.:.:.:.:.:.:.	.:.:.:.:.:.:.	.:.:.:.:.:.:.	.:.:.:.:.:.:.	.:.:.:.:.:.:.	.:.:.:.:.:.:.	.:.:.:.:.:.:.	.:.:.:.:.:.:.	.:.:.:.:.:.:.	.:.:.:.:.:.:.	.:.:.:.:.:.:.	.:.:.:.:.:.:.	.:.:.:.:.:.:.	.:.:.:.:.:.:.	.:.:.:.:.:.:.	.:.:.:.:.:.:.	.:.:.:.:.:.:.	.:.:.:.:.:.:.	.:.:.:.:.:.:.	.:.:.:.:.:.:.	.:.:.:.:.:.:.	.:.:.:.:.:.:.	.:.:.:.:.:.:.	.:.:.:.:.:.:.	.:.:.:.:.:.:.	.:.:.:.:.:.:.	.:.:.:.:.:.:.	.:.:.:.:.:.:.	.:.:.:.:.:.:.	.:.:.:.:.:.:.	.:.:.:.:.:.:.	Present	.:.:.:.:.:.:.	.:.:.:.:.:.:.	.:.:.:.:.:.:.	.:.:.:.:.:.:.	.:.:.:.:.:.:.	.:.:.:.:.:.:.
	4	3589101	T	C	synonymous variant|LOW	.:.:.:.:.:.:.	.:.:.:.:.:.:.	.:.:.:.:.:.:.	.:.:.:.:.:.:.	.:.:.:.:.:.:.	.:.:.:.:.:.:.	.:.:.:.:.:.:.	.:.:.:.:.:.:.	Present	Present	Present	Present	Present	Present	Present	.:.:.:.:.:.:.	.:.:.:.:.:.:.	Present	Present	.:.:.:.:.:.:.	Present	.:.:.:.:.:.:.	.:.:.:.:.:.:.	.:.:.:.:.:.:.	.:.:.:.:.:.:.	.:.:.:.:.:.:.	.:.:.:.:.:.:.	.:.:.:.:.:.:.	.:.:.:.:.:.:.	.:.:.:.:.:.:.	.:.:.:.:.:.:.	.:.:.:.:.:.:.	.:.:.:.:.:.:.	.:.:.:.:.:.:.	.:.:.:.:.:.:.	.:.:.:.:.:.:.	.:.:.:.:.:.:.	.:.:.:.:.:.:.	.:.:.:.:.:.:.	.:.:.:.:.:.:.	.:.:.:.:.:.:.	.:.:.:.:.:.:.	.:.:.:.:.:.:.	.:.:.:.:.:.:.
	4	3589485	T	C	synonymous variant|LOW	.:.:.:.:.:.:.	.:.:.:.:.:.:.	.:.:.:.:.:.:.	.:.:.:.:.:.:.	.:.:.:.:.:.:.	.:.:.:.:.:.:.	.:.:.:.:.:.:.	.:.:.:.:.:.:.	.:.:.:.:.:.:.	.:.:.:.:.:.:.	.:.:.:.:.:.:.	.:.:.:.:.:.:.	.:.:.:.:.:.:.	.:.:.:.:.:.:.	.:.:.:.:.:.:.	.:.:.:.:.:.:.	.:.:.:.:.:.:.	.:.:.:.:.:.:.	.:.:.:.:.:.:.	.:.:.:.:.:.:.	.:.:.:.:.:.:.	.:.:.:.:.:.:.	.:.:.:.:.:.:.	.:.:.:.:.:.:.	.:.:.:.:.:.:.	.:.:.:.:.:.:.	.:.:.:.:.:.:.	.:.:.:.:.:.:.	.:.:.:.:.:.:.	.:.:.:.:.:.:.	.:.:.:.:.:.:.	.:.:.:.:.:.:.	.:.:.:.:.:.:.	.:.:.:.:.:.:.	.:.:.:.:.:.:.	.:.:.:.:.:.:.	.:.:.:.:.:.:.	.:.:.:.:.:.:.	.:.:.:.:.:.:.	.:.:.:.:.:.:.	.:.:.:.:.:.:.	.:.:.:.:.:.:.	.:.:.:.:.:.:.	.:.:.:.:.:.:.
	4	3589521	G	T	missense variant|MODERATE|Gln -> His	.:.:.:.:.:.:.	.:.:.:.:.:.:.	.:.:.:.:.:.:.	.:.:.:.:.:.:.	.:.:.:.:.:.:.	.:.:.:.:.:.:.	.:.:.:.:.:.:.	.:.:.:.:.:.:.	.:.:.:.:.:.:.	.:.:.:.:.:.:.	.:.:.:.:.:.:.	.:.:.:.:.:.:.	.:.:.:.:.:.:.	.:.:.:.:.:.:.	.:.:.:.:.:.:.	.:.:.:.:.:.:.	.:.:.:.:.:.:.	.:.:.:.:.:.:.	.:.:.:.:.:.:.	.:.:.:.:.:.:.	.:.:.:.:.:.:.	.:.:.:.:.:.:.	.:.:.:.:.:.:.	.:.:.:.:.:.:.	.:.:.:.:.:.:.	Present	.:.:.:.:.:.:.	.:.:.:.:.:.:.	.:.:.:.:.:.:.	.:.:.:.:.:.:.	.:.:.:.:.:.:.	.:.:.:.:.:.:.	.:.:.:.:.:.:.	.:.:.:.:.:.:.	.:.:.:.:.:.:.	.:.:.:.:.:.:.	Present	.:.:.:.:.:.:.	.:.:.:.:.:.:.	.:.:.:.:.:.:.	.:.:.:.:.:.:.	.:.:.:.:.:.:.	.:.:.:.:.:.:.	.:.:.:.:.:.:.
sho1	5	2137560	G	A	synonymous variant|LOW	.:.:.:.:.:.:.	.:.:.:.:.:.:.	.:.:.:.:.:.:.	.:.:.:.:.:.:.	.:.:.:.:.:.:.	.:.:.:.:.:.:.	.:.:.:.:.:.:.	.:.:.:.:.:.:.	.:.:.:.:.:.:.	.:.:.:.:.:.:.	.:.:.:.:.:.:.	.:.:.:.:.:.:.	.:.:.:.:.:.:.	.:.:.:.:.:.:.	.:.:.:.:.:.:.	.:.:.:.:.:.:.	.:.:.:.:.:.:.	.:.:.:.:.:.:.	.:.:.:.:.:.:.	.:.:.:.:.:.:.	.:.:.:.:.:.:.	.:.:.:.:.:.:.	.:.:.:.:.:.:.	.:.:.:.:.:.:.	.:.:.:.:.:.:.	.:.:.:.:.:.:.	.:.:.:.:.:.:.	.:.:.:.:.:.:.	.:.:.:.:.:.:.	.:.:.:.:.:.:.	.:.:.:.:.:.:.	Present	.:.:.:.:.:.:.	.:.:.:.:.:.:.	.:.:.:.:.:.:.	.:.:.:.:.:.:.	.:.:.:.:.:.:.	.:.:.:.:.:.:.	.:.:.:.:.:.:.	.:.:.:.:.:.:.	.:.:.:.:.:.:.	.:.:.:.:.:.:.	.:.:.:.:.:.:.	.:.:.:.:.:.:.
	5	2137566	A	G	synonymous variant|LOW	.:.:.:.:.:.:.	.:.:.:.:.:.:.	.:.:.:.:.:.:.	.:.:.:.:.:.:.	.:.:.:.:.:.:.	.:.:.:.:.:.:.	.:.:.:.:.:.:.	.:.:.:.:.:.:.	.:.:.:.:.:.:.	.:.:.:.:.:.:.	.:.:.:.:.:.:.	.:.:.:.:.:.:.	.:.:.:.:.:.:.	.:.:.:.:.:.:.	.:.:.:.:.:.:.	.:.:.:.:.:.:.	.:.:.:.:.:.:.	Present	.:.:.:.:.:.:.	.:.:.:.:.:.:.	.:.:.:.:.:.:.	.:.:.:.:.:.:.	.:.:.:.:.:.:.	.:.:.:.:.:.:.	.:.:.:.:.:.:.	.:.:.:.:.:.:.	.:.:.:.:.:.:.	.:.:.:.:.:.:.	.:.:.:.:.:.:.	.:.:.:.:.:.:.	.:.:.:.:.:.:.	.:.:.:.:.:.:.	.:.:.:.:.:.:.	.:.:.:.:.:.:.	.:.:.:.:.:.:.	.:.:.:.:.:.:.	.:.:.:.:.:.:.	.:.:.:.:.:.:.	.:.:.:.:.:.:.	.:.:.:.:.:.:.	.:.:.:.:.:.:.	.:.:.:.:.:.:.	.:.:.:.:.:.:.	.:.:.:.:.:.:.
	5	2137757	T	C	missense variant|MODERATE|Thr -> Ala	.:.:.:.:.:.:.	.:.:.:.:.:.:.	.:.:.:.:.:.:.	.:.:.:.:.:.:.	.:.:.:.:.:.:.	.:.:.:.:.:.:.	.:.:.:.:.:.:.	.:.:.:.:.:.:.	.:.:.:.:.:.:.	.:.:.:.:.:.:.	.:.:.:.:.:.:.	.:.:.:.:.:.:.	.:.:.:.:.:.:.	.:.:.:.:.:.:.	.:.:.:.:.:.:.	.:.:.:.:.:.:.	.:.:.:.:.:.:.	.:.:.:.:.:.:.	.:.:.:.:.:.:.	.:.:.:.:.:.:.	.:.:.:.:.:.:.	.:.:.:.:.:.:.	.:.:.:.:.:.:.	.:.:.:.:.:.:.	.:.:.:.:.:.:.	.:.:.:.:.:.:.	.:.:.:.:.:.:.	.:.:.:.:.:.:.	.:.:.:.:.:.:.	.:.:.:.:.:.:.	.:.:.:.:.:.:.	.:.:.:.:.:.:.	.:.:.:.:.:.:.	.:.:.:.:.:.:.	.:.:.:.:.:.:.	.:.:.:.:.:.:.	.:.:.:.:.:.:.	.:.:.:.:.:.:.	.:.:.:.:.:.:.	.:.:.:.:.:.:.	.:.:.:.:.:.:.	.:.:.:.:.:.:.	.:.:.:.:.:.:.	.:.:.:.:.:.:.
	5	2137806	G	A	Intron	.:.:.:.:.:.:.	.:.:.:.:.:.:.	.:.:.:.:.:.:.	.:.:.:.:.:.:.	.:.:.:.:.:.:.	Present	.:.:.:.:.:.:.	.:.:.:.:.:.:.	Present	Present	Present	Present	Present	Present	Present	.:.:.:.:.:.:.	.:.:.:.:.:.:.	Present	Present	.:.:.:.:.:.:.	Present	.:.:.:.:.:.:.	.:.:.:.:.:.:.	.:.:.:.:.:.:.	.:.:.:.:.:.:.	.:.:.:.:.:.:.	.:.:.:.:.:.:.	.:.:.:.:.:.:.	.:.:.:.:.:.:.	.:.:.:.:.:.:.	.:.:.:.:.:.:.	.:.:.:.:.:.:.	.:.:.:.:.:.:.	.:.:.:.:.:.:.	.:.:.:.:.:.:.	.:.:.:.:.:.:.	.:.:.:.:.:.:.	.:.:.:.:.:.:.	.:.:.:.:.:.:.	.:.:.:.:.:.:.	.:.:.:.:.:.:.	.:.:.:.:.:.:.	.:.:.:.:.:.:.	.:.:.:.:.:.:.
	5	2137888	C	T	synonymous variant|LOW	Present	Present	Present	Present	Present	Present	Present	Present	Present	Present	Present	Present	Present	Present	Present	.:.:.:.:.:.:.	.:.:.:.:.:.:.	Present	Present	.:.:.:.:.:.:.	Present	Present	Present	Present	Present	Present	Present	Present	Present	Present	.:.:.:.:.:.:.	.:.:.:.:.:.:.	Present	.:.:.:.:.:.:.	Present	Present	Present	.:.:.:.:.:.:.	.:.:.:.:.:.:.	Present	Present	Present	.:.:.:.:.:.:.	Present
	5	2137968	T	C	missense variant|MODERATE|Thr -> Ala	.:.:.:.:.:.:.	.:.:.:.:.:.:.	.:.:.:.:.:.:.	.:.:.:.:.:.:.	.:.:.:.:.:.:.	.:.:.:.:.:.:.	.:.:.:.:.:.:.	.:.:.:.:.:.:.	Present	Present	Present	Present	Present	Present	Present	.:.:.:.:.:.:.	.:.:.:.:.:.:.	.:.:.:.:.:.:.	Present	.:.:.:.:.:.:.	Present	.:.:.:.:.:.:.	.:.:.:.:.:.:.	.:.:.:.:.:.:.	.:.:.:.:.:.:.	.:.:.:.:.:.:.	.:.:.:.:.:.:.	.:.:.:.:.:.:.	.:.:.:.:.:.:.	.:.:.:.:.:.:.	.:.:.:.:.:.:.	.:.:.:.:.:.:.	.:.:.:.:.:.:.	.:.:.:.:.:.:.	.:.:.:.:.:.:.	.:.:.:.:.:.:.	.:.:.:.:.:.:.	.:.:.:.:.:.:.	.:.:.:.:.:.:.	.:.:.:.:.:.:.	.:.:.:.:.:.:.	.:.:.:.:.:.:.	.:.:.:.:.:.:.	.:.:.:.:.:.:.
	5	2138079	G	A	synonymous variant|LOW	.:.:.:.:.:.:.	.:.:.:.:.:.:.	.:.:.:.:.:.:.	.:.:.:.:.:.:.	.:.:.:.:.:.:.	Present	.:.:.:.:.:.:.	.:.:.:.:.:.:.	.:.:.:.:.:.:.	.:.:.:.:.:.:.	.:.:.:.:.:.:.	.:.:.:.:.:.:.	.:.:.:.:.:.:.	.:.:.:.:.:.:.	.:.:.:.:.:.:.	.:.:.:.:.:.:.	.:.:.:.:.:.:.	.:.:.:.:.:.:.	.:.:.:.:.:.:.	.:.:.:.:.:.:.	.:.:.:.:.:.:.	.:.:.:.:.:.:.	.:.:.:.:.:.:.	.:.:.:.:.:.:.	.:.:.:.:.:.:.	.:.:.:.:.:.:.	.:.:.:.:.:.:.	.:.:.:.:.:.:.	.:.:.:.:.:.:.	.:.:.:.:.:.:.	.:.:.:.:.:.:.	.:.:.:.:.:.:.	.:.:.:.:.:.:.	.:.:.:.:.:.:.	.:.:.:.:.:.:.	.:.:.:.:.:.:.	.:.:.:.:.:.:.	.:.:.:.:.:.:.	.:.:.:.:.:.:.	.:.:.:.:.:.:.	.:.:.:.:.:.:.	.:.:.:.:.:.:.	.:.:.:.:.:.:.	.:.:.:.:.:.:.
	5	2138260	A	G	splice region variant&intron variant|LOW	Present	Present	Present	Present	Present	Present	Present	Present	Present	Present	Present	Present	Present	Present	Present	.:.:.:.:.:.:.	.:.:.:.:.:.:.	Present	Present	.:.:.:.:.:.:.	Present	Present	Present	Present	Present	Present	Present	Present	Present	Present	.:.:.:.:.:.:.	.:.:.:.:.:.:.	Present	.:.:.:.:.:.:.	Present	Present	Present	.:.:.:.:.:.:.	.:.:.:.:.:.:.	Present	Present	Present	.:.:.:.:.:.:.	Present
mpkC	5	2340892	G	A	Intron	.:.:.:.:.:.:.	.:.:.:.:.:.:.	.:.:.:.:.:.:.	.:.:.:.:.:.:.	.:.:.:.:.:.:.	.:.:.:.:.:.:.	.:.:.:.:.:.:.	.:.:.:.:.:.:.	Present	Present	Present	Present	Present	Present	Present	.:.:.:.:.:.:.	.:.:.:.:.:.:.	Present	Present	.:.:.:.:.:.:.	Present	.:.:.:.:.:.:.	.:.:.:.:.:.:.	.:.:.:.:.:.:.	.:.:.:.:.:.:.	.:.:.:.:.:.:.	.:.:.:.:.:.:.	.:.:.:.:.:.:.	.:.:.:.:.:.:.	.:.:.:.:.:.:.	.:.:.:.:.:.:.	.:.:.:.:.:.:.	.:.:.:.:.:.:.	.:.:.:.:.:.:.	.:.:.:.:.:.:.	.:.:.:.:.:.:.	.:.:.:.:.:.:.	.:.:.:.:.:.:.	.:.:.:.:.:.:.	.:.:.:.:.:.:.	.:.:.:.:.:.:.	.:.:.:.:.:.:.	.:.:.:.:.:.:.	.:.:.:.:.:.:.
	5	2340926	G	A	Intron	.:.:.:.:.:.:.	.:.:.:.:.:.:.	.:.:.:.:.:.:.	.:.:.:.:.:.:.	.:.:.:.:.:.:.	.:.:.:.:.:.:.	.:.:.:.:.:.:.	.:.:.:.:.:.:.	Present	Present	Present	Present	Present	Present	Present	.:.:.:.:.:.:.	.:.:.:.:.:.:.	Present	Present	.:.:.:.:.:.:.	Present	.:.:.:.:.:.:.	.:.:.:.:.:.:.	.:.:.:.:.:.:.	.:.:.:.:.:.:.	.:.:.:.:.:.:.	.:.:.:.:.:.:.	.:.:.:.:.:.:.	.:.:.:.:.:.:.	.:.:.:.:.:.:.	.:.:.:.:.:.:.	.:.:.:.:.:.:.	.:.:.:.:.:.:.	.:.:.:.:.:.:.	.:.:.:.:.:.:.	.:.:.:.:.:.:.	.:.:.:.:.:.:.	.:.:.:.:.:.:.	.:.:.:.:.:.:.	.:.:.:.:.:.:.	.:.:.:.:.:.:.	.:.:.:.:.:.:.	.:.:.:.:.:.:.	.:.:.:.:.:.:.
	5	2341038	C	A	Intron	.:.:.:.:.:.:.	.:.:.:.:.:.:.	.:.:.:.:.:.:.	.:.:.:.:.:.:.	.:.:.:.:.:.:.	.:.:.:.:.:.:.	.:.:.:.:.:.:.	.:.:.:.:.:.:.	Present	Present	Present	Present	Present	Present	Present	.:.:.:.:.:.:.	.:.:.:.:.:.:.	Present	Present	.:.:.:.:.:.:.	Present	.:.:.:.:.:.:.	.:.:.:.:.:.:.	.:.:.:.:.:.:.	.:.:.:.:.:.:.	.:.:.:.:.:.:.	.:.:.:.:.:.:.	.:.:.:.:.:.:.	.:.:.:.:.:.:.	.:.:.:.:.:.:.	.:.:.:.:.:.:.	.:.:.:.:.:.:.	.:.:.:.:.:.:.	.:.:.:.:.:.:.	.:.:.:.:.:.:.	.:.:.:.:.:.:.	.:.:.:.:.:.:.	.:.:.:.:.:.:.	.:.:.:.:.:.:.	.:.:.:.:.:.:.	.:.:.:.:.:.:.	.:.:.:.:.:.:.	.:.:.:.:.:.:.	.:.:.:.:.:.:.
	5	2341085	C	T	synonymous variant|LOW	.:.:.:.:.:.:.	.:.:.:.:.:.:.	.:.:.:.:.:.:.	.:.:.:.:.:.:.	.:.:.:.:.:.:.	.:.:.:.:.:.:.	.:.:.:.:.:.:.	.:.:.:.:.:.:.	Present	Present	Present	Present	Present	Present	Present	.:.:.:.:.:.:.	.:.:.:.:.:.:.	.:.:.:.:.:.:.	Present	.:.:.:.:.:.:.	Present	.:.:.:.:.:.:.	.:.:.:.:.:.:.	.:.:.:.:.:.:.	.:.:.:.:.:.:.	.:.:.:.:.:.:.	.:.:.:.:.:.:.	.:.:.:.:.:.:.	.:.:.:.:.:.:.	.:.:.:.:.:.:.	.:.:.:.:.:.:.	.:.:.:.:.:.:.	.:.:.:.:.:.:.	.:.:.:.:.:.:.	.:.:.:.:.:.:.	.:.:.:.:.:.:.	.:.:.:.:.:.:.	.:.:.:.:.:.:.	.:.:.:.:.:.:.	.:.:.:.:.:.:.	.:.:.:.:.:.:.	.:.:.:.:.:.:.	.:.:.:.:.:.:.	.:.:.:.:.:.:.
	5	2341097	A	C	synonymous variant|LOW	Present	Present	Present	Present	Present	Present	Present	Present	Present	Present	Present	Present	Present	Present	Present	.:.:.:.:.:.:.	.:.:.:.:.:.:.	Present	Present	Present	Present	Present	Present	Present	Present	Present	Present	Present	Present	Present	Present	Present	Present	Present	Present	Present	Present	Present	Present	Present	Present	Present	Present	Present
	5	2341461	T	C	missense variant|MODERATE|Phe -> Ser	.:.:.:.:.:.:.	.:.:.:.:.:.:.	.:.:.:.:.:.:.	.:.:.:.:.:.:.	.:.:.:.:.:.:.	.:.:.:.:.:.:.	.:.:.:.:.:.:.	.:.:.:.:.:.:.	Present	.:.:.:.:.:.:.	.:.:.:.:.:.:.	Present	.:.:.:.:.:.:.	Present	.:.:.:.:.:.:.	.:.:.:.:.:.:.	.:.:.:.:.:.:.	.:.:.:.:.:.:.	Present	.:.:.:.:.:.:.	.:.:.:.:.:.:.	.:.:.:.:.:.:.	.:.:.:.:.:.:.	.:.:.:.:.:.:.	.:.:.:.:.:.:.	.:.:.:.:.:.:.	.:.:.:.:.:.:.	.:.:.:.:.:.:.	.:.:.:.:.:.:.	.:.:.:.:.:.:.	.:.:.:.:.:.:.	.:.:.:.:.:.:.	.:.:.:.:.:.:.	.:.:.:.:.:.:.	.:.:.:.:.:.:.	.:.:.:.:.:.:.	.:.:.:.:.:.:.	.:.:.:.:.:.:.	.:.:.:.:.:.:.	.:.:.:.:.:.:.	.:.:.:.:.:.:.	.:.:.:.:.:.:.	.:.:.:.:.:.:.	.:.:.:.:.:.:.
	5	2341468	C	A	stop gained|HIGH|Tyr -> Stop	.:.:.:.:.:.:.	.:.:.:.:.:.:.	.:.:.:.:.:.:.	.:.:.:.:.:.:.	.:.:.:.:.:.:.	.:.:.:.:.:.:.	.:.:.:.:.:.:.	.:.:.:.:.:.:.	Present	.:.:.:.:.:.:.	.:.:.:.:.:.:.	Present	.:.:.:.:.:.:.	Present	.:.:.:.:.:.:.	.:.:.:.:.:.:.	.:.:.:.:.:.:.	.:.:.:.:.:.:.	Present	.:.:.:.:.:.:.	.:.:.:.:.:.:.	.:.:.:.:.:.:.	.:.:.:.:.:.:.	.:.:.:.:.:.:.	.:.:.:.:.:.:.	.:.:.:.:.:.:.	.:.:.:.:.:.:.	.:.:.:.:.:.:.	.:.:.:.:.:.:.	.:.:.:.:.:.:.	.:.:.:.:.:.:.	.:.:.:.:.:.:.	.:.:.:.:.:.:.	.:.:.:.:.:.:.	.:.:.:.:.:.:.	.:.:.:.:.:.:.	.:.:.:.:.:.:.	.:.:.:.:.:.:.	.:.:.:.:.:.:.	.:.:.:.:.:.:.	.:.:.:.:.:.:.	.:.:.:.:.:.:.	.:.:.:.:.:.:.	.:.:.:.:.:.:.
	5	2341523	T	A	Intron	Present	Present	Present	Present	Present	.:.:.:.:.:.:.	Present	Present	.:.:.:.:.:.:.	.:.:.:.:.:.:.	.:.:.:.:.:.:.	.:.:.:.:.:.:.	.:.:.:.:.:.:.	.:.:.:.:.:.:.	.:.:.:.:.:.:.	.:.:.:.:.:.:.	.:.:.:.:.:.:.	.:.:.:.:.:.:.	.:.:.:.:.:.:.	.:.:.:.:.:.:.	.:.:.:.:.:.:.	Present	Present	Present	Present	Present	Present	Present	Present	Present	.:.:.:.:.:.:.	.:.:.:.:.:.:.	Present	.:.:.:.:.:.:.	Present	Present	Present	.:.:.:.:.:.:.	.:.:.:.:.:.:.	Present	Present	Present	.:.:.:.:.:.:.	Present
	5	2341553	T	C	missense variant|MODERATE|Ser -> Pro	.:.:.:.:.:.:.	.:.:.:.:.:.:.	.:.:.:.:.:.:.	.:.:.:.:.:.:.	.:.:.:.:.:.:.	.:.:.:.:.:.:.	.:.:.:.:.:.:.	.:.:.:.:.:.:.	.:.:.:.:.:.:.	.:.:.:.:.:.:.	.:.:.:.:.:.:.	.:.:.:.:.:.:.	.:.:.:.:.:.:.	.:.:.:.:.:.:.	.:.:.:.:.:.:.	.:.:.:.:.:.:.	.:.:.:.:.:.:.	.:.:.:.:.:.:.	.:.:.:.:.:.:.	.:.:.:.:.:.:.	Present	.:.:.:.:.:.:.	.:.:.:.:.:.:.	.:.:.:.:.:.:.	.:.:.:.:.:.:.	.:.:.:.:.:.:.	.:.:.:.:.:.:.	.:.:.:.:.:.:.	.:.:.:.:.:.:.	.:.:.:.:.:.:.	.:.:.:.:.:.:.	.:.:.:.:.:.:.	.:.:.:.:.:.:.	.:.:.:.:.:.:.	.:.:.:.:.:.:.	.:.:.:.:.:.:.	.:.:.:.:.:.:.	.:.:.:.:.:.:.	.:.:.:.:.:.:.	.:.:.:.:.:.:.	.:.:.:.:.:.:.	.:.:.:.:.:.:.	.:.:.:.:.:.:.	.:.:.:.:.:.:.
	5	2341698	A	C	missense variant|MODERATE|Gln -> Pro	Present	Present	Present	Present	Present	Present	Present	Present	Present	Present	Present	Present	Present	Present	Present	.:.:.:.:.:.:.	.:.:.:.:.:.:.	Present	Present	Present	Present	Present	Present	Present	Present	Present	Present	Present	Present	Present	Present	Present	Present	Present	Present	Present	Present	Present	Present	Present	Present	Present	Present	Present
	5	2341781	A	G	missense variant|MODERATE|Arg -> Gly	Present	Present	Present	Present	Present	Present	Present	Present	Present	Present	Present	Present	Present	Present	Present	.:.:.:.:.:.:.	.:.:.:.:.:.:.	Present	Present	Present	Present	Present	Present	Present	Present	Present	Present	Present	Present	Present	Present	Present	Present	Present	Present	Present	Present	Present	Present	Present	Present	Present	Present	Present
	5	2342164	T	C	missense variant|MODERATE|Tyr -> His	Present	Present	Present	Present	Present	Present	Present	Present	Present	Present	Present	Present	Present	Present	Present	.:.:.:.:.:.:.	.:.:.:.:.:.:.	Present	Present	Present	Present	Present	Present	Present	Present	Present	Present	Present	Present	Present	Present	Present	Present	Present	Present	Present	Present	Present	Present	Present	Present	Present	Present	Present
	5	2342264	G	C	missense variant|MODERATE|Trp -> Ser	.:.:.:.:.:.:.	.:.:.:.:.:.:.	.:.:.:.:.:.:.	.:.:.:.:.:.:.	.:.:.:.:.:.:.	.:.:.:.:.:.:.	.:.:.:.:.:.:.	.:.:.:.:.:.:.	.:.:.:.:.:.:.	.:.:.:.:.:.:.	.:.:.:.:.:.:.	.:.:.:.:.:.:.	.:.:.:.:.:.:.	.:.:.:.:.:.:.	.:.:.:.:.:.:.	.:.:.:.:.:.:.	.:.:.:.:.:.:.	.:.:.:.:.:.:.	.:.:.:.:.:.:.	Present	.:.:.:.:.:.:.	.:.:.:.:.:.:.	.:.:.:.:.:.:.	.:.:.:.:.:.:.	.:.:.:.:.:.:.	.:.:.:.:.:.:.	.:.:.:.:.:.:.	.:.:.:.:.:.:.	.:.:.:.:.:.:.	.:.:.:.:.:.:.	Present	Present	.:.:.:.:.:.:.	Present	.:.:.:.:.:.:.	.:.:.:.:.:.:.	.:.:.:.:.:.:.	.:.:.:.:.:.:.	Present	.:.:.:.:.:.:.	.:.:.:.:.:.:.	.:.:.:.:.:.:.	Present	.:.:.:.:.:.:.
	5	2342302	T	C	Intron	.:.:.:.:.:.:.	.:.:.:.:.:.:.	.:.:.:.:.:.:.	.:.:.:.:.:.:.	.:.:.:.:.:.:.	.:.:.:.:.:.:.	.:.:.:.:.:.:.	.:.:.:.:.:.:.	.:.:.:.:.:.:.	.:.:.:.:.:.:.	.:.:.:.:.:.:.	.:.:.:.:.:.:.	.:.:.:.:.:.:.	.:.:.:.:.:.:.	.:.:.:.:.:.:.	.:.:.:.:.:.:.	.:.:.:.:.:.:.	.:.:.:.:.:.:.	.:.:.:.:.:.:.	.:.:.:.:.:.:.	.:.:.:.:.:.:.	.:.:.:.:.:.:.	.:.:.:.:.:.:.	.:.:.:.:.:.:.	.:.:.:.:.:.:.	.:.:.:.:.:.:.	.:.:.:.:.:.:.	.:.:.:.:.:.:.	.:.:.:.:.:.:.	.:.:.:.:.:.:.	.:.:.:.:.:.:.	.:.:.:.:.:.:.	.:.:.:.:.:.:.	.:.:.:.:.:.:.	.:.:.:.:.:.:.	.:.:.:.:.:.:.	.:.:.:.:.:.:.	.:.:.:.:.:.:.	.:.:.:.:.:.:.	.:.:.:.:.:.:.	.:.:.:.:.:.:.	.:.:.:.:.:.:.	.:.:.:.:.:.:.	.:.:.:.:.:.:.
	5	2342303	G	C	Intron	.:.:.:.:.:.:.	.:.:.:.:.:.:.	.:.:.:.:.:.:.	.:.:.:.:.:.:.	.:.:.:.:.:.:.	.:.:.:.:.:.:.	.:.:.:.:.:.:.	.:.:.:.:.:.:.	Present	Present	Present	Present	Present	Present	Present	.:.:.:.:.:.:.	.:.:.:.:.:.:.	.:.:.:.:.:.:.	Present	.:.:.:.:.:.:.	Present	.:.:.:.:.:.:.	.:.:.:.:.:.:.	.:.:.:.:.:.:.	.:.:.:.:.:.:.	.:.:.:.:.:.:.	.:.:.:.:.:.:.	.:.:.:.:.:.:.	.:.:.:.:.:.:.	.:.:.:.:.:.:.	.:.:.:.:.:.:.	.:.:.:.:.:.:.	.:.:.:.:.:.:.	.:.:.:.:.:.:.	.:.:.:.:.:.:.	.:.:.:.:.:.:.	.:.:.:.:.:.:.	.:.:.:.:.:.:.	.:.:.:.:.:.:.	.:.:.:.:.:.:.	.:.:.:.:.:.:.	.:.:.:.:.:.:.	.:.:.:.:.:.:.	.:.:.:.:.:.:.
	5	2342466	T	C	missense variant|MODERATE|Ile -> Thr	.:.:.:.:.:.:.	.:.:.:.:.:.:.	.:.:.:.:.:.:.	.:.:.:.:.:.:.	.:.:.:.:.:.:.	.:.:.:.:.:.:.	.:.:.:.:.:.:.	.:.:.:.:.:.:.	.:.:.:.:.:.:.	.:.:.:.:.:.:.	.:.:.:.:.:.:.	.:.:.:.:.:.:.	.:.:.:.:.:.:.	.:.:.:.:.:.:.	.:.:.:.:.:.:.	.:.:.:.:.:.:.	.:.:.:.:.:.:.	.:.:.:.:.:.:.	.:.:.:.:.:.:.	Present	.:.:.:.:.:.:.	.:.:.:.:.:.:.	.:.:.:.:.:.:.	.:.:.:.:.:.:.	.:.:.:.:.:.:.	.:.:.:.:.:.:.	.:.:.:.:.:.:.	.:.:.:.:.:.:.	.:.:.:.:.:.:.	.:.:.:.:.:.:.	Present	Present	.:.:.:.:.:.:.	Present	.:.:.:.:.:.:.	.:.:.:.:.:.:.	.:.:.:.:.:.:.	.:.:.:.:.:.:.	Present	.:.:.:.:.:.:.	.:.:.:.:.:.:.	.:.:.:.:.:.:.	Present	.:.:.:.:.:.:.
fos1	6	2531810	C	T	synonymous variant|LOW	.:.:.:.:.:.:.	.:.:.:.:.:.:.	.:.:.:.:.:.:.	.:.:.:.:.:.:.	.:.:.:.:.:.:.	.:.:.:.:.:.:.	.:.:.:.:.:.:.	.:.:.:.:.:.:.	.:.:.:.:.:.:.	.:.:.:.:.:.:.	.:.:.:.:.:.:.	.:.:.:.:.:.:.	.:.:.:.:.:.:.	.:.:.:.:.:.:.	.:.:.:.:.:.:.	.:.:.:.:.:.:.	.:.:.:.:.:.:.	.:.:.:.:.:.:.	.:.:.:.:.:.:.	.:.:.:.:.:.:.	.:.:.:.:.:.:.	.:.:.:.:.:.:.	.:.:.:.:.:.:.	.:.:.:.:.:.:.	.:.:.:.:.:.:.	.:.:.:.:.:.:.	.:.:.:.:.:.:.	.:.:.:.:.:.:.	.:.:.:.:.:.:.	.:.:.:.:.:.:.	.:.:.:.:.:.:.	.:.:.:.:.:.:.	.:.:.:.:.:.:.	.:.:.:.:.:.:.	.:.:.:.:.:.:.	.:.:.:.:.:.:.	.:.:.:.:.:.:.	.:.:.:.:.:.:.	.:.:.:.:.:.:.	.:.:.:.:.:.:.	.:.:.:.:.:.:.	.:.:.:.:.:.:.	.:.:.:.:.:.:.	.:.:.:.:.:.:.
	6	2531817	A	G	missense variant|MODERATE|Lys -> Glu	Present	.:.:.:.:.:.:.	.:.:.:.:.:.:.	.:.:.:.:.:.:.	.:.:.:.:.:.:.	.:.:.:.:.:.:.	Present	Present	.:.:.:.:.:.:.	.:.:.:.:.:.:.	.:.:.:.:.:.:.	.:.:.:.:.:.:.	.:.:.:.:.:.:.	.:.:.:.:.:.:.	.:.:.:.:.:.:.	.:.:.:.:.:.:.	.:.:.:.:.:.:.	.:.:.:.:.:.:.	.:.:.:.:.:.:.	.:.:.:.:.:.:.	.:.:.:.:.:.:.	Present	Present	Present	Present	Present	.:.:.:.:.:.:.	.:.:.:.:.:.:.	Present	Present	Present	.:.:.:.:.:.:.	Present	Present	Present	Present	Present	.:.:.:.:.:.:.	Present	Present	Present	Present	.:.:.:.:.:.:.	.:.:.:.:.:.:.
	6	2531884	C	A	missense variant|MODERATE|Thr -> Asn	.:.:.:.:.:.:.	Present	Present	Present	Present	.:.:.:.:.:.:.	.:.:.:.:.:.:.	.:.:.:.:.:.:.	.:.:.:.:.:.:.	.:.:.:.:.:.:.	.:.:.:.:.:.:.	.:.:.:.:.:.:.	.:.:.:.:.:.:.	.:.:.:.:.:.:.	.:.:.:.:.:.:.	.:.:.:.:.:.:.	.:.:.:.:.:.:.	.:.:.:.:.:.:.	.:.:.:.:.:.:.	.:.:.:.:.:.:.	.:.:.:.:.:.:.	.:.:.:.:.:.:.	.:.:.:.:.:.:.	.:.:.:.:.:.:.	.:.:.:.:.:.:.	.:.:.:.:.:.:.	Present	Present	.:.:.:.:.:.:.	.:.:.:.:.:.:.	.:.:.:.:.:.:.	.:.:.:.:.:.:.	.:.:.:.:.:.:.	.:.:.:.:.:.:.	.:.:.:.:.:.:.	.:.:.:.:.:.:.	.:.:.:.:.:.:.	.:.:.:.:.:.:.	.:.:.:.:.:.:.	.:.:.:.:.:.:.	.:.:.:.:.:.:.	.:.:.:.:.:.:.	.:.:.:.:.:.:.	.:.:.:.:.:.:.
	6	2532004	C	G	missense variant|MODERATE|Thr -> Ser	.:.:.:.:.:.:.	.:.:.:.:.:.:.	.:.:.:.:.:.:.	.:.:.:.:.:.:.	.:.:.:.:.:.:.	.:.:.:.:.:.:.	.:.:.:.:.:.:.	.:.:.:.:.:.:.	.:.:.:.:.:.:.	.:.:.:.:.:.:.	.:.:.:.:.:.:.	.:.:.:.:.:.:.	.:.:.:.:.:.:.	.:.:.:.:.:.:.	.:.:.:.:.:.:.	.:.:.:.:.:.:.	.:.:.:.:.:.:.	.:.:.:.:.:.:.	.:.:.:.:.:.:.	.:.:.:.:.:.:.	.:.:.:.:.:.:.	.:.:.:.:.:.:.	.:.:.:.:.:.:.	.:.:.:.:.:.:.	.:.:.:.:.:.:.	.:.:.:.:.:.:.	.:.:.:.:.:.:.	.:.:.:.:.:.:.	.:.:.:.:.:.:.	.:.:.:.:.:.:.	Present	.:.:.:.:.:.:.	.:.:.:.:.:.:.	.:.:.:.:.:.:.	.:.:.:.:.:.:.	.:.:.:.:.:.:.	.:.:.:.:.:.:.	.:.:.:.:.:.:.	.:.:.:.:.:.:.	.:.:.:.:.:.:.	.:.:.:.:.:.:.	.:.:.:.:.:.:.	.:.:.:.:.:.:.	.:.:.:.:.:.:.
	6	2532179	C	T	synonymous variant|LOW	Present	.:.:.:.:.:.:.	.:.:.:.:.:.:.	.:.:.:.:.:.:.	.:.:.:.:.:.:.	.:.:.:.:.:.:.	Present	Present	.:.:.:.:.:.:.	.:.:.:.:.:.:.	.:.:.:.:.:.:.	.:.:.:.:.:.:.	.:.:.:.:.:.:.	.:.:.:.:.:.:.	.:.:.:.:.:.:.	.:.:.:.:.:.:.	.:.:.:.:.:.:.	.:.:.:.:.:.:.	.:.:.:.:.:.:.	.:.:.:.:.:.:.	.:.:.:.:.:.:.	Present	Present	Present	Present	.:.:.:.:.:.:.	.:.:.:.:.:.:.	.:.:.:.:.:.:.	.:.:.:.:.:.:.	Present	Present	.:.:.:.:.:.:.	Present	.:.:.:.:.:.:.	Present	Present	.:.:.:.:.:.:.	.:.:.:.:.:.:.	.:.:.:.:.:.:.	Present	Present	Present	.:.:.:.:.:.:.	.:.:.:.:.:.:.
	6	2532217	C	T	missense variant|MODERATE|Thr -> Met	.:.:.:.:.:.:.	.:.:.:.:.:.:.	.:.:.:.:.:.:.	.:.:.:.:.:.:.	.:.:.:.:.:.:.	.:.:.:.:.:.:.	.:.:.:.:.:.:.	.:.:.:.:.:.:.	Present	Present	Present	Present	Present	Present	Present	.:.:.:.:.:.:.	.:.:.:.:.:.:.	.:.:.:.:.:.:.	Present	.:.:.:.:.:.:.	Present	.:.:.:.:.:.:.	.:.:.:.:.:.:.	.:.:.:.:.:.:.	.:.:.:.:.:.:.	.:.:.:.:.:.:.	.:.:.:.:.:.:.	.:.:.:.:.:.:.	.:.:.:.:.:.:.	.:.:.:.:.:.:.	.:.:.:.:.:.:.	.:.:.:.:.:.:.	.:.:.:.:.:.:.	.:.:.:.:.:.:.	.:.:.:.:.:.:.	.:.:.:.:.:.:.	.:.:.:.:.:.:.	.:.:.:.:.:.:.	.:.:.:.:.:.:.	.:.:.:.:.:.:.	.:.:.:.:.:.:.	.:.:.:.:.:.:.	.:.:.:.:.:.:.	.:.:.:.:.:.:.
	6	2532269	T	C	synonymous variant|LOW	.:.:.:.:.:.:.	.:.:.:.:.:.:.	.:.:.:.:.:.:.	.:.:.:.:.:.:.	.:.:.:.:.:.:.	.:.:.:.:.:.:.	.:.:.:.:.:.:.	.:.:.:.:.:.:.	.:.:.:.:.:.:.	.:.:.:.:.:.:.	.:.:.:.:.:.:.	.:.:.:.:.:.:.	.:.:.:.:.:.:.	.:.:.:.:.:.:.	.:.:.:.:.:.:.	.:.:.:.:.:.:.	.:.:.:.:.:.:.	.:.:.:.:.:.:.	.:.:.:.:.:.:.	.:.:.:.:.:.:.	.:.:.:.:.:.:.	.:.:.:.:.:.:.	.:.:.:.:.:.:.	.:.:.:.:.:.:.	.:.:.:.:.:.:.	.:.:.:.:.:.:.	.:.:.:.:.:.:.	.:.:.:.:.:.:.	Present	.:.:.:.:.:.:.	.:.:.:.:.:.:.	.:.:.:.:.:.:.	.:.:.:.:.:.:.	.:.:.:.:.:.:.	.:.:.:.:.:.:.	.:.:.:.:.:.:.	.:.:.:.:.:.:.	.:.:.:.:.:.:.	.:.:.:.:.:.:.	.:.:.:.:.:.:.	.:.:.:.:.:.:.	.:.:.:.:.:.:.	.:.:.:.:.:.:.	.:.:.:.:.:.:.
	6	2532293	C	T	synonymous variant|LOW	.:.:.:.:.:.:.	.:.:.:.:.:.:.	.:.:.:.:.:.:.	.:.:.:.:.:.:.	.:.:.:.:.:.:.	.:.:.:.:.:.:.	.:.:.:.:.:.:.	.:.:.:.:.:.:.	Present	Present	Present	Present	Present	Present	Present	.:.:.:.:.:.:.	.:.:.:.:.:.:.	.:.:.:.:.:.:.	Present	.:.:.:.:.:.:.	Present	.:.:.:.:.:.:.	.:.:.:.:.:.:.	.:.:.:.:.:.:.	.:.:.:.:.:.:.	.:.:.:.:.:.:.	.:.:.:.:.:.:.	.:.:.:.:.:.:.	.:.:.:.:.:.:.	.:.:.:.:.:.:.	.:.:.:.:.:.:.	.:.:.:.:.:.:.	.:.:.:.:.:.:.	.:.:.:.:.:.:.	.:.:.:.:.:.:.	.:.:.:.:.:.:.	.:.:.:.:.:.:.	.:.:.:.:.:.:.	.:.:.:.:.:.:.	.:.:.:.:.:.:.	.:.:.:.:.:.:.	.:.:.:.:.:.:.	.:.:.:.:.:.:.	.:.:.:.:.:.:.
	6	2532314	G	A	synonymous variant|LOW	Present	.:.:.:.:.:.:.	.:.:.:.:.:.:.	.:.:.:.:.:.:.	.:.:.:.:.:.:.	.:.:.:.:.:.:.	Present	Present	.:.:.:.:.:.:.	.:.:.:.:.:.:.	.:.:.:.:.:.:.	.:.:.:.:.:.:.	.:.:.:.:.:.:.	.:.:.:.:.:.:.	.:.:.:.:.:.:.	.:.:.:.:.:.:.	.:.:.:.:.:.:.	.:.:.:.:.:.:.	.:.:.:.:.:.:.	.:.:.:.:.:.:.	.:.:.:.:.:.:.	Present	Present	Present	Present	Present	.:.:.:.:.:.:.	.:.:.:.:.:.:.	Present	Present	Present	.:.:.:.:.:.:.	Present	Present	Present	Present	Present	.:.:.:.:.:.:.	Present	Present	Present	Present	.:.:.:.:.:.:.	.:.:.:.:.:.:.
	6	2532389	A	G	synonymous variant|LOW	.:.:.:.:.:.:.	Present	Present	Present	Present	Present	.:.:.:.:.:.:.	.:.:.:.:.:.:.	.:.:.:.:.:.:.	.:.:.:.:.:.:.	.:.:.:.:.:.:.	.:.:.:.:.:.:.	.:.:.:.:.:.:.	.:.:.:.:.:.:.	.:.:.:.:.:.:.	.:.:.:.:.:.:.	.:.:.:.:.:.:.	Present	.:.:.:.:.:.:.	Present	.:.:.:.:.:.:.	.:.:.:.:.:.:.	.:.:.:.:.:.:.	.:.:.:.:.:.:.	.:.:.:.:.:.:.	.:.:.:.:.:.:.	Present	Present	.:.:.:.:.:.:.	.:.:.:.:.:.:.	.:.:.:.:.:.:.	Present	.:.:.:.:.:.:.	.:.:.:.:.:.:.	.:.:.:.:.:.:.	.:.:.:.:.:.:.	.:.:.:.:.:.:.	Present	.:.:.:.:.:.:.	.:.:.:.:.:.:.	.:.:.:.:.:.:.	.:.:.:.:.:.:.	Present	Present
	6	2532425	C	T	synonymous variant|LOW	.:.:.:.:.:.:.	.:.:.:.:.:.:.	.:.:.:.:.:.:.	.:.:.:.:.:.:.	.:.:.:.:.:.:.	.:.:.:.:.:.:.	.:.:.:.:.:.:.	.:.:.:.:.:.:.	Present	Present	Present	Present	Present	Present	Present	.:.:.:.:.:.:.	.:.:.:.:.:.:.	.:.:.:.:.:.:.	Present	.:.:.:.:.:.:.	Present	.:.:.:.:.:.:.	.:.:.:.:.:.:.	.:.:.:.:.:.:.	.:.:.:.:.:.:.	.:.:.:.:.:.:.	.:.:.:.:.:.:.	.:.:.:.:.:.:.	.:.:.:.:.:.:.	.:.:.:.:.:.:.	.:.:.:.:.:.:.	.:.:.:.:.:.:.	.:.:.:.:.:.:.	.:.:.:.:.:.:.	.:.:.:.:.:.:.	.:.:.:.:.:.:.	.:.:.:.:.:.:.	.:.:.:.:.:.:.	.:.:.:.:.:.:.	.:.:.:.:.:.:.	.:.:.:.:.:.:.	.:.:.:.:.:.:.	.:.:.:.:.:.:.	.:.:.:.:.:.:.
	6	2532483	T	A	missense variant|MODERATE|Phe -> Ile	Present	Present	Present	Present	Present	Present	Present	Present	Present	Present	Present	Present	Present	Present	Present	.:.:.:.:.:.:.	.:.:.:.:.:.:.	Present	Present	Present	Present	Present	Present	Present	Present	Present	Present	Present	Present	Present	Present	Present	Present	Present	Present	Present	Present	Present	Present	Present	Present	Present	Present	Present
	6	2532590	C	T	synonymous variant|LOW	.:.:.:.:.:.:.	.:.:.:.:.:.:.	.:.:.:.:.:.:.	.:.:.:.:.:.:.	.:.:.:.:.:.:.	.:.:.:.:.:.:.	.:.:.:.:.:.:.	.:.:.:.:.:.:.	Present	Present	Present	Present	Present	Present	Present	.:.:.:.:.:.:.	.:.:.:.:.:.:.	Present	Present	.:.:.:.:.:.:.	Present	.:.:.:.:.:.:.	.:.:.:.:.:.:.	.:.:.:.:.:.:.	.:.:.:.:.:.:.	.:.:.:.:.:.:.	.:.:.:.:.:.:.	.:.:.:.:.:.:.	.:.:.:.:.:.:.	.:.:.:.:.:.:.	.:.:.:.:.:.:.	.:.:.:.:.:.:.	.:.:.:.:.:.:.	.:.:.:.:.:.:.	.:.:.:.:.:.:.	.:.:.:.:.:.:.	.:.:.:.:.:.:.	.:.:.:.:.:.:.	.:.:.:.:.:.:.	.:.:.:.:.:.:.	.:.:.:.:.:.:.	.:.:.:.:.:.:.	Present	.:.:.:.:.:.:.
	6	2532668	T	C	synonymous variant|LOW	.:.:.:.:.:.:.	.:.:.:.:.:.:.	.:.:.:.:.:.:.	.:.:.:.:.:.:.	.:.:.:.:.:.:.	.:.:.:.:.:.:.	.:.:.:.:.:.:.	.:.:.:.:.:.:.	.:.:.:.:.:.:.	.:.:.:.:.:.:.	.:.:.:.:.:.:.	.:.:.:.:.:.:.	.:.:.:.:.:.:.	.:.:.:.:.:.:.	.:.:.:.:.:.:.	.:.:.:.:.:.:.	.:.:.:.:.:.:.	.:.:.:.:.:.:.	.:.:.:.:.:.:.	.:.:.:.:.:.:.	.:.:.:.:.:.:.	.:.:.:.:.:.:.	.:.:.:.:.:.:.	.:.:.:.:.:.:.	.:.:.:.:.:.:.	.:.:.:.:.:.:.	.:.:.:.:.:.:.	.:.:.:.:.:.:.	.:.:.:.:.:.:.	.:.:.:.:.:.:.	.:.:.:.:.:.:.	.:.:.:.:.:.:.	.:.:.:.:.:.:.	Present	.:.:.:.:.:.:.	.:.:.:.:.:.:.	.:.:.:.:.:.:.	.:.:.:.:.:.:.	Present	.:.:.:.:.:.:.	.:.:.:.:.:.:.	.:.:.:.:.:.:.	.:.:.:.:.:.:.	.:.:.:.:.:.:.
	6	2532692	G	A	synonymous variant|LOW	.:.:.:.:.:.:.	.:.:.:.:.:.:.	.:.:.:.:.:.:.	.:.:.:.:.:.:.	.:.:.:.:.:.:.	.:.:.:.:.:.:.	.:.:.:.:.:.:.	.:.:.:.:.:.:.	.:.:.:.:.:.:.	.:.:.:.:.:.:.	.:.:.:.:.:.:.	.:.:.:.:.:.:.	.:.:.:.:.:.:.	.:.:.:.:.:.:.	.:.:.:.:.:.:.	.:.:.:.:.:.:.	.:.:.:.:.:.:.	.:.:.:.:.:.:.	.:.:.:.:.:.:.	.:.:.:.:.:.:.	.:.:.:.:.:.:.	.:.:.:.:.:.:.	.:.:.:.:.:.:.	Present	.:.:.:.:.:.:.	.:.:.:.:.:.:.	.:.:.:.:.:.:.	.:.:.:.:.:.:.	.:.:.:.:.:.:.	Present	Present	.:.:.:.:.:.:.	.:.:.:.:.:.:.	.:.:.:.:.:.:.	.:.:.:.:.:.:.	.:.:.:.:.:.:.	.:.:.:.:.:.:.	.:.:.:.:.:.:.	.:.:.:.:.:.:.	.:.:.:.:.:.:.	Present	Present	.:.:.:.:.:.:.	.:.:.:.:.:.:.
	6	2532798	C	T	synonymous variant|LOW	.:.:.:.:.:.:.	.:.:.:.:.:.:.	.:.:.:.:.:.:.	.:.:.:.:.:.:.	.:.:.:.:.:.:.	.:.:.:.:.:.:.	.:.:.:.:.:.:.	.:.:.:.:.:.:.	Present	Present	Present	Present	Present	Present	Present	.:.:.:.:.:.:.	.:.:.:.:.:.:.	Present	Present	.:.:.:.:.:.:.	Present	.:.:.:.:.:.:.	.:.:.:.:.:.:.	.:.:.:.:.:.:.	.:.:.:.:.:.:.	.:.:.:.:.:.:.	.:.:.:.:.:.:.	.:.:.:.:.:.:.	.:.:.:.:.:.:.	.:.:.:.:.:.:.	.:.:.:.:.:.:.	.:.:.:.:.:.:.	.:.:.:.:.:.:.	.:.:.:.:.:.:.	.:.:.:.:.:.:.	.:.:.:.:.:.:.	.:.:.:.:.:.:.	.:.:.:.:.:.:.	.:.:.:.:.:.:.	.:.:.:.:.:.:.	.:.:.:.:.:.:.	.:.:.:.:.:.:.	Present	.:.:.:.:.:.:.
	6	2532935	T	C	synonymous variant|LOW	.:.:.:.:.:.:.	.:.:.:.:.:.:.	.:.:.:.:.:.:.	.:.:.:.:.:.:.	.:.:.:.:.:.:.	.:.:.:.:.:.:.	.:.:.:.:.:.:.	.:.:.:.:.:.:.	.:.:.:.:.:.:.	.:.:.:.:.:.:.	.:.:.:.:.:.:.	.:.:.:.:.:.:.	.:.:.:.:.:.:.	.:.:.:.:.:.:.	.:.:.:.:.:.:.	.:.:.:.:.:.:.	.:.:.:.:.:.:.	.:.:.:.:.:.:.	.:.:.:.:.:.:.	.:.:.:.:.:.:.	.:.:.:.:.:.:.	.:.:.:.:.:.:.	.:.:.:.:.:.:.	.:.:.:.:.:.:.	.:.:.:.:.:.:.	.:.:.:.:.:.:.	.:.:.:.:.:.:.	.:.:.:.:.:.:.	.:.:.:.:.:.:.	Present	.:.:.:.:.:.:.	.:.:.:.:.:.:.	.:.:.:.:.:.:.	.:.:.:.:.:.:.	.:.:.:.:.:.:.	.:.:.:.:.:.:.	.:.:.:.:.:.:.	.:.:.:.:.:.:.	.:.:.:.:.:.:.	.:.:.:.:.:.:.	.:.:.:.:.:.:.	.:.:.:.:.:.:.	.:.:.:.:.:.:.	.:.:.:.:.:.:.
	6	2533009	G	A	missense variant|MODERATE|Ser -> Asn	Present	.:.:.:.:.:.:.	.:.:.:.:.:.:.	.:.:.:.:.:.:.	.:.:.:.:.:.:.	.:.:.:.:.:.:.	Present	Present	.:.:.:.:.:.:.	.:.:.:.:.:.:.	.:.:.:.:.:.:.	.:.:.:.:.:.:.	.:.:.:.:.:.:.	.:.:.:.:.:.:.	.:.:.:.:.:.:.	.:.:.:.:.:.:.	.:.:.:.:.:.:.	.:.:.:.:.:.:.	.:.:.:.:.:.:.	.:.:.:.:.:.:.	.:.:.:.:.:.:.	Present	Present	Present	Present	Present	.:.:.:.:.:.:.	.:.:.:.:.:.:.	Present	Present	Present	.:.:.:.:.:.:.	Present	Present	Present	Present	Present	.:.:.:.:.:.:.	Present	Present	Present	Present	.:.:.:.:.:.:.	.:.:.:.:.:.:.
	6	2533020	A	G	missense variant|MODERATE|Ile -> Val	.:.:.:.:.:.:.	.:.:.:.:.:.:.	.:.:.:.:.:.:.	.:.:.:.:.:.:.	.:.:.:.:.:.:.	.:.:.:.:.:.:.	.:.:.:.:.:.:.	.:.:.:.:.:.:.	Present	Present	Present	Present	Present	Present	Present	.:.:.:.:.:.:.	.:.:.:.:.:.:.	.:.:.:.:.:.:.	Present	.:.:.:.:.:.:.	Present	.:.:.:.:.:.:.	.:.:.:.:.:.:.	.:.:.:.:.:.:.	.:.:.:.:.:.:.	.:.:.:.:.:.:.	.:.:.:.:.:.:.	.:.:.:.:.:.:.	.:.:.:.:.:.:.	.:.:.:.:.:.:.	.:.:.:.:.:.:.	.:.:.:.:.:.:.	.:.:.:.:.:.:.	.:.:.:.:.:.:.	.:.:.:.:.:.:.	.:.:.:.:.:.:.	.:.:.:.:.:.:.	.:.:.:.:.:.:.	.:.:.:.:.:.:.	.:.:.:.:.:.:.	.:.:.:.:.:.:.	.:.:.:.:.:.:.	.:.:.:.:.:.:.	.:.:.:.:.:.:.
	6	2533103	A	T	missense variant|MODERATE|Lys -> Asn	Present	.:.:.:.:.:.:.	.:.:.:.:.:.:.	.:.:.:.:.:.:.	.:.:.:.:.:.:.	.:.:.:.:.:.:.	Present	Present	.:.:.:.:.:.:.	.:.:.:.:.:.:.	.:.:.:.:.:.:.	.:.:.:.:.:.:.	.:.:.:.:.:.:.	.:.:.:.:.:.:.	.:.:.:.:.:.:.	.:.:.:.:.:.:.	.:.:.:.:.:.:.	.:.:.:.:.:.:.	.:.:.:.:.:.:.	.:.:.:.:.:.:.	.:.:.:.:.:.:.	Present	Present	Present	Present	Present	.:.:.:.:.:.:.	.:.:.:.:.:.:.	Present	Present	Present	.:.:.:.:.:.:.	Present	Present	Present	Present	Present	.:.:.:.:.:.:.	Present	Present	Present	Present	.:.:.:.:.:.:.	.:.:.:.:.:.:.
	6	2533171	T	A	missense variant|MODERATE|Phe -> Tyr	.:.:.:.:.:.:.	.:.:.:.:.:.:.	.:.:.:.:.:.:.	.:.:.:.:.:.:.	.:.:.:.:.:.:.	.:.:.:.:.:.:.	.:.:.:.:.:.:.	.:.:.:.:.:.:.	.:.:.:.:.:.:.	.:.:.:.:.:.:.	.:.:.:.:.:.:.	.:.:.:.:.:.:.	.:.:.:.:.:.:.	.:.:.:.:.:.:.	.:.:.:.:.:.:.	.:.:.:.:.:.:.	Present	.:.:.:.:.:.:.	.:.:.:.:.:.:.	.:.:.:.:.:.:.	.:.:.:.:.:.:.	.:.:.:.:.:.:.	.:.:.:.:.:.:.	.:.:.:.:.:.:.	.:.:.:.:.:.:.	.:.:.:.:.:.:.	.:.:.:.:.:.:.	.:.:.:.:.:.:.	.:.:.:.:.:.:.	.:.:.:.:.:.:.	.:.:.:.:.:.:.	.:.:.:.:.:.:.	.:.:.:.:.:.:.	.:.:.:.:.:.:.	.:.:.:.:.:.:.	.:.:.:.:.:.:.	.:.:.:.:.:.:.	.:.:.:.:.:.:.	.:.:.:.:.:.:.	.:.:.:.:.:.:.	.:.:.:.:.:.:.	.:.:.:.:.:.:.	.:.:.:.:.:.:.	.:.:.:.:.:.:.
	6	2533244	C	A	synonymous variant|LOW	.:.:.:.:.:.:.	.:.:.:.:.:.:.	.:.:.:.:.:.:.	.:.:.:.:.:.:.	.:.:.:.:.:.:.	.:.:.:.:.:.:.	.:.:.:.:.:.:.	.:.:.:.:.:.:.	.:.:.:.:.:.:.	.:.:.:.:.:.:.	.:.:.:.:.:.:.	.:.:.:.:.:.:.	.:.:.:.:.:.:.	.:.:.:.:.:.:.	.:.:.:.:.:.:.	.:.:.:.:.:.:.	.:.:.:.:.:.:.	.:.:.:.:.:.:.	.:.:.:.:.:.:.	.:.:.:.:.:.:.	.:.:.:.:.:.:.	.:.:.:.:.:.:.	.:.:.:.:.:.:.	.:.:.:.:.:.:.	.:.:.:.:.:.:.	.:.:.:.:.:.:.	.:.:.:.:.:.:.	.:.:.:.:.:.:.	Present	.:.:.:.:.:.:.	.:.:.:.:.:.:.	.:.:.:.:.:.:.	.:.:.:.:.:.:.	.:.:.:.:.:.:.	.:.:.:.:.:.:.	.:.:.:.:.:.:.	.:.:.:.:.:.:.	.:.:.:.:.:.:.	.:.:.:.:.:.:.	.:.:.:.:.:.:.	.:.:.:.:.:.:.	.:.:.:.:.:.:.	.:.:.:.:.:.:.	.:.:.:.:.:.:.
	6	2533399	C	A	missense variant|MODERATE|Ala -> Asp	Present	Present	Present	Present	Present	.:.:.:.:.:.:.	Present	Present	Present	Present	Present	Present	Present	Present	Present	.:.:.:.:.:.:.	.:.:.:.:.:.:.	Present	Present	.:.:.:.:.:.:.	Present	Present	Present	Present	Present	Present	Present	Present	Present	Present	Present	Present	Present	Present	Present	Present	Present	.:.:.:.:.:.:.	Present	Present	Present	Present	Present	.:.:.:.:.:.:.
	6	2533412	T	C	synonymous variant|LOW	.:.:.:.:.:.:.	.:.:.:.:.:.:.	.:.:.:.:.:.:.	.:.:.:.:.:.:.	.:.:.:.:.:.:.	.:.:.:.:.:.:.	.:.:.:.:.:.:.	.:.:.:.:.:.:.	Present	Present	Present	Present	Present	Present	Present	.:.:.:.:.:.:.	.:.:.:.:.:.:.	.:.:.:.:.:.:.	Present	.:.:.:.:.:.:.	Present	.:.:.:.:.:.:.	.:.:.:.:.:.:.	.:.:.:.:.:.:.	.:.:.:.:.:.:.	.:.:.:.:.:.:.	.:.:.:.:.:.:.	.:.:.:.:.:.:.	.:.:.:.:.:.:.	.:.:.:.:.:.:.	.:.:.:.:.:.:.	.:.:.:.:.:.:.	.:.:.:.:.:.:.	.:.:.:.:.:.:.	.:.:.:.:.:.:.	.:.:.:.:.:.:.	.:.:.:.:.:.:.	.:.:.:.:.:.:.	.:.:.:.:.:.:.	.:.:.:.:.:.:.	.:.:.:.:.:.:.	.:.:.:.:.:.:.	.:.:.:.:.:.:.	.:.:.:.:.:.:.
	6	2533478	C	T	synonymous variant|LOW	.:.:.:.:.:.:.	.:.:.:.:.:.:.	.:.:.:.:.:.:.	.:.:.:.:.:.:.	.:.:.:.:.:.:.	.:.:.:.:.:.:.	.:.:.:.:.:.:.	.:.:.:.:.:.:.	Present	Present	Present	Present	Present	Present	Present	.:.:.:.:.:.:.	.:.:.:.:.:.:.	Present	Present	.:.:.:.:.:.:.	Present	.:.:.:.:.:.:.	.:.:.:.:.:.:.	.:.:.:.:.:.:.	.:.:.:.:.:.:.	.:.:.:.:.:.:.	.:.:.:.:.:.:.	.:.:.:.:.:.:.	.:.:.:.:.:.:.	.:.:.:.:.:.:.	.:.:.:.:.:.:.	.:.:.:.:.:.:.	.:.:.:.:.:.:.	.:.:.:.:.:.:.	.:.:.:.:.:.:.	.:.:.:.:.:.:.	.:.:.:.:.:.:.	.:.:.:.:.:.:.	.:.:.:.:.:.:.	.:.:.:.:.:.:.	.:.:.:.:.:.:.	.:.:.:.:.:.:.	Present	.:.:.:.:.:.:.
	6	2533542	G	A	missense variant|MODERATE|Glu -> Lys	.:.:.:.:.:.:.	.:.:.:.:.:.:.	.:.:.:.:.:.:.	.:.:.:.:.:.:.	.:.:.:.:.:.:.	.:.:.:.:.:.:.	.:.:.:.:.:.:.	.:.:.:.:.:.:.	.:.:.:.:.:.:.	.:.:.:.:.:.:.	.:.:.:.:.:.:.	.:.:.:.:.:.:.	.:.:.:.:.:.:.	.:.:.:.:.:.:.	.:.:.:.:.:.:.	.:.:.:.:.:.:.	Present	.:.:.:.:.:.:.	.:.:.:.:.:.:.	.:.:.:.:.:.:.	.:.:.:.:.:.:.	.:.:.:.:.:.:.	.:.:.:.:.:.:.	.:.:.:.:.:.:.	.:.:.:.:.:.:.	.:.:.:.:.:.:.	.:.:.:.:.:.:.	.:.:.:.:.:.:.	.:.:.:.:.:.:.	.:.:.:.:.:.:.	.:.:.:.:.:.:.	.:.:.:.:.:.:.	.:.:.:.:.:.:.	.:.:.:.:.:.:.	.:.:.:.:.:.:.	.:.:.:.:.:.:.	.:.:.:.:.:.:.	.:.:.:.:.:.:.	.:.:.:.:.:.:.	.:.:.:.:.:.:.	.:.:.:.:.:.:.	.:.:.:.:.:.:.	.:.:.:.:.:.:.	.:.:.:.:.:.:.
	6	2533718	T	C	synonymous variant|LOW	.:.:.:.:.:.:.	.:.:.:.:.:.:.	.:.:.:.:.:.:.	.:.:.:.:.:.:.	.:.:.:.:.:.:.	.:.:.:.:.:.:.	.:.:.:.:.:.:.	.:.:.:.:.:.:.	Present	Present	Present	Present	Present	Present	Present	.:.:.:.:.:.:.	.:.:.:.:.:.:.	.:.:.:.:.:.:.	Present	.:.:.:.:.:.:.	Present	.:.:.:.:.:.:.	.:.:.:.:.:.:.	.:.:.:.:.:.:.	.:.:.:.:.:.:.	.:.:.:.:.:.:.	.:.:.:.:.:.:.	.:.:.:.:.:.:.	.:.:.:.:.:.:.	.:.:.:.:.:.:.	.:.:.:.:.:.:.	.:.:.:.:.:.:.	.:.:.:.:.:.:.	.:.:.:.:.:.:.	.:.:.:.:.:.:.	.:.:.:.:.:.:.	.:.:.:.:.:.:.	.:.:.:.:.:.:.	.:.:.:.:.:.:.	.:.:.:.:.:.:.	.:.:.:.:.:.:.	.:.:.:.:.:.:.	.:.:.:.:.:.:.	.:.:.:.:.:.:.
skn7	6	3158725	T	A	Intron	.:.:.:.:.:.:.	.:.:.:.:.:.:.	.:.:.:.:.:.:.	.:.:.:.:.:.:.	.:.:.:.:.:.:.	.:.:.:.:.:.:.	.:.:.:.:.:.:.	.:.:.:.:.:.:.	Present	Present	Present	Present	Present	Present	Present	.:.:.:.:.:.:.	.:.:.:.:.:.:.	.:.:.:.:.:.:.	Present	.:.:.:.:.:.:.	Present	.:.:.:.:.:.:.	.:.:.:.:.:.:.	.:.:.:.:.:.:.	.:.:.:.:.:.:.	.:.:.:.:.:.:.	.:.:.:.:.:.:.	.:.:.:.:.:.:.	.:.:.:.:.:.:.	.:.:.:.:.:.:.	.:.:.:.:.:.:.	.:.:.:.:.:.:.	.:.:.:.:.:.:.	.:.:.:.:.:.:.	.:.:.:.:.:.:.	.:.:.:.:.:.:.	.:.:.:.:.:.:.	.:.:.:.:.:.:.	.:.:.:.:.:.:.	.:.:.:.:.:.:.	.:.:.:.:.:.:.	.:.:.:.:.:.:.	.:.:.:.:.:.:.	.:.:.:.:.:.:.
	6	3158817	G	A	Intron	.:.:.:.:.:.:.	.:.:.:.:.:.:.	.:.:.:.:.:.:.	.:.:.:.:.:.:.	.:.:.:.:.:.:.	.:.:.:.:.:.:.	.:.:.:.:.:.:.	.:.:.:.:.:.:.	.:.:.:.:.:.:.	Present	.:.:.:.:.:.:.	.:.:.:.:.:.:.	Present	.:.:.:.:.:.:.	Present	.:.:.:.:.:.:.	.:.:.:.:.:.:.	.:.:.:.:.:.:.	.:.:.:.:.:.:.	.:.:.:.:.:.:.	.:.:.:.:.:.:.	.:.:.:.:.:.:.	.:.:.:.:.:.:.	.:.:.:.:.:.:.	.:.:.:.:.:.:.	.:.:.:.:.:.:.	.:.:.:.:.:.:.	.:.:.:.:.:.:.	.:.:.:.:.:.:.	.:.:.:.:.:.:.	.:.:.:.:.:.:.	.:.:.:.:.:.:.	.:.:.:.:.:.:.	.:.:.:.:.:.:.	.:.:.:.:.:.:.	.:.:.:.:.:.:.	.:.:.:.:.:.:.	.:.:.:.:.:.:.	.:.:.:.:.:.:.	.:.:.:.:.:.:.	.:.:.:.:.:.:.	.:.:.:.:.:.:.	.:.:.:.:.:.:.	.:.:.:.:.:.:.
	6	3158906	C	T	Intron	.:.:.:.:.:.:.	.:.:.:.:.:.:.	.:.:.:.:.:.:.	.:.:.:.:.:.:.	.:.:.:.:.:.:.	.:.:.:.:.:.:.	.:.:.:.:.:.:.	.:.:.:.:.:.:.	Present	Present	Present	Present	Present	Present	Present	.:.:.:.:.:.:.	.:.:.:.:.:.:.	.:.:.:.:.:.:.	Present	.:.:.:.:.:.:.	Present	.:.:.:.:.:.:.	.:.:.:.:.:.:.	.:.:.:.:.:.:.	.:.:.:.:.:.:.	.:.:.:.:.:.:.	.:.:.:.:.:.:.	.:.:.:.:.:.:.	.:.:.:.:.:.:.	.:.:.:.:.:.:.	.:.:.:.:.:.:.	.:.:.:.:.:.:.	.:.:.:.:.:.:.	.:.:.:.:.:.:.	.:.:.:.:.:.:.	.:.:.:.:.:.:.	.:.:.:.:.:.:.	.:.:.:.:.:.:.	.:.:.:.:.:.:.	.:.:.:.:.:.:.	.:.:.:.:.:.:.	.:.:.:.:.:.:.	.:.:.:.:.:.:.	.:.:.:.:.:.:.
	6	3158961	G	C	synonymous variant|LOW	Present	Present	Present	Present	Present	.:.:.:.:.:.:.	Present	Present	.:.:.:.:.:.:.	.:.:.:.:.:.:.	.:.:.:.:.:.:.	.:.:.:.:.:.:.	.:.:.:.:.:.:.	.:.:.:.:.:.:.	.:.:.:.:.:.:.	.:.:.:.:.:.:.	.:.:.:.:.:.:.	.:.:.:.:.:.:.	.:.:.:.:.:.:.	.:.:.:.:.:.:.	.:.:.:.:.:.:.	.:.:.:.:.:.:.	.:.:.:.:.:.:.	Present	.:.:.:.:.:.:.	Present	Present	Present	.:.:.:.:.:.:.	Present	.:.:.:.:.:.:.	.:.:.:.:.:.:.	Present	.:.:.:.:.:.:.	.:.:.:.:.:.:.	Present	.:.:.:.:.:.:.	.:.:.:.:.:.:.	.:.:.:.:.:.:.	Present	.:.:.:.:.:.:.	Present	.:.:.:.:.:.:.	Present
	6	3159003	T	C	synonymous variant|LOW	.:.:.:.:.:.:.	.:.:.:.:.:.:.	.:.:.:.:.:.:.	.:.:.:.:.:.:.	.:.:.:.:.:.:.	.:.:.:.:.:.:.	.:.:.:.:.:.:.	.:.:.:.:.:.:.	Present	Present	Present	Present	Present	Present	Present	.:.:.:.:.:.:.	.:.:.:.:.:.:.	.:.:.:.:.:.:.	Present	.:.:.:.:.:.:.	Present	.:.:.:.:.:.:.	.:.:.:.:.:.:.	.:.:.:.:.:.:.	.:.:.:.:.:.:.	.:.:.:.:.:.:.	.:.:.:.:.:.:.	.:.:.:.:.:.:.	.:.:.:.:.:.:.	.:.:.:.:.:.:.	.:.:.:.:.:.:.	.:.:.:.:.:.:.	.:.:.:.:.:.:.	.:.:.:.:.:.:.	.:.:.:.:.:.:.	.:.:.:.:.:.:.	.:.:.:.:.:.:.	.:.:.:.:.:.:.	.:.:.:.:.:.:.	.:.:.:.:.:.:.	.:.:.:.:.:.:.	.:.:.:.:.:.:.	.:.:.:.:.:.:.	.:.:.:.:.:.:.
	6	3159063	C	T	Intron	.:.:.:.:.:.:.	.:.:.:.:.:.:.	.:.:.:.:.:.:.	.:.:.:.:.:.:.	.:.:.:.:.:.:.	.:.:.:.:.:.:.	.:.:.:.:.:.:.	.:.:.:.:.:.:.	Present	Present	Present	Present	Present	Present	Present	.:.:.:.:.:.:.	.:.:.:.:.:.:.	.:.:.:.:.:.:.	Present	.:.:.:.:.:.:.	Present	.:.:.:.:.:.:.	.:.:.:.:.:.:.	.:.:.:.:.:.:.	.:.:.:.:.:.:.	.:.:.:.:.:.:.	.:.:.:.:.:.:.	.:.:.:.:.:.:.	.:.:.:.:.:.:.	.:.:.:.:.:.:.	.:.:.:.:.:.:.	.:.:.:.:.:.:.	.:.:.:.:.:.:.	.:.:.:.:.:.:.	.:.:.:.:.:.:.	.:.:.:.:.:.:.	.:.:.:.:.:.:.	.:.:.:.:.:.:.	.:.:.:.:.:.:.	.:.:.:.:.:.:.	.:.:.:.:.:.:.	.:.:.:.:.:.:.	.:.:.:.:.:.:.	.:.:.:.:.:.:.
	6	3159088	C	G	splice region variant&intron variant|LOW	.:.:.:.:.:.:.	.:.:.:.:.:.:.	.:.:.:.:.:.:.	.:.:.:.:.:.:.	.:.:.:.:.:.:.	.:.:.:.:.:.:.	.:.:.:.:.:.:.	.:.:.:.:.:.:.	.:.:.:.:.:.:.	.:.:.:.:.:.:.	.:.:.:.:.:.:.	.:.:.:.:.:.:.	.:.:.:.:.:.:.	.:.:.:.:.:.:.	.:.:.:.:.:.:.	.:.:.:.:.:.:.	.:.:.:.:.:.:.	.:.:.:.:.:.:.	.:.:.:.:.:.:.	.:.:.:.:.:.:.	.:.:.:.:.:.:.	.:.:.:.:.:.:.	.:.:.:.:.:.:.	.:.:.:.:.:.:.	.:.:.:.:.:.:.	.:.:.:.:.:.:.	.:.:.:.:.:.:.	.:.:.:.:.:.:.	.:.:.:.:.:.:.	.:.:.:.:.:.:.	.:.:.:.:.:.:.	.:.:.:.:.:.:.	.:.:.:.:.:.:.	.:.:.:.:.:.:.	.:.:.:.:.:.:.	.:.:.:.:.:.:.	.:.:.:.:.:.:.	1:48:0:0:48:1809:-163.048,0	.:.:.:.:.:.:.	.:.:.:.:.:.:.	.:.:.:.:.:.:.	.:.:.:.:.:.:.	.:.:.:.:.:.:.	.:.:.:.:.:.:.
	6	3159263	C	A	Intron	.:.:.:.:.:.:.	.:.:.:.:.:.:.	.:.:.:.:.:.:.	.:.:.:.:.:.:.	.:.:.:.:.:.:.	.:.:.:.:.:.:.	.:.:.:.:.:.:.	.:.:.:.:.:.:.	Present	Present	Present	Present	Present	Present	Present	.:.:.:.:.:.:.	.:.:.:.:.:.:.	.:.:.:.:.:.:.	Present	.:.:.:.:.:.:.	Present	.:.:.:.:.:.:.	.:.:.:.:.:.:.	.:.:.:.:.:.:.	.:.:.:.:.:.:.	.:.:.:.:.:.:.	.:.:.:.:.:.:.	.:.:.:.:.:.:.	.:.:.:.:.:.:.	.:.:.:.:.:.:.	.:.:.:.:.:.:.	.:.:.:.:.:.:.	.:.:.:.:.:.:.	.:.:.:.:.:.:.	.:.:.:.:.:.:.	.:.:.:.:.:.:.	.:.:.:.:.:.:.	.:.:.:.:.:.:.	.:.:.:.:.:.:.	.:.:.:.:.:.:.	.:.:.:.:.:.:.	.:.:.:.:.:.:.	.:.:.:.:.:.:.	.:.:.:.:.:.:.
	6	3159469	G	T	synonymous variant|LOW	.:.:.:.:.:.:.	.:.:.:.:.:.:.	.:.:.:.:.:.:.	.:.:.:.:.:.:.	.:.:.:.:.:.:.	.:.:.:.:.:.:.	.:.:.:.:.:.:.	.:.:.:.:.:.:.	.:.:.:.:.:.:.	.:.:.:.:.:.:.	.:.:.:.:.:.:.	Present	.:.:.:.:.:.:.	Present	.:.:.:.:.:.:.	.:.:.:.:.:.:.	.:.:.:.:.:.:.	.:.:.:.:.:.:.	.:.:.:.:.:.:.	.:.:.:.:.:.:.	.:.:.:.:.:.:.	.:.:.:.:.:.:.	.:.:.:.:.:.:.	.:.:.:.:.:.:.	.:.:.:.:.:.:.	.:.:.:.:.:.:.	.:.:.:.:.:.:.	.:.:.:.:.:.:.	.:.:.:.:.:.:.	.:.:.:.:.:.:.	.:.:.:.:.:.:.	.:.:.:.:.:.:.	.:.:.:.:.:.:.	.:.:.:.:.:.:.	.:.:.:.:.:.:.	.:.:.:.:.:.:.	.:.:.:.:.:.:.	.:.:.:.:.:.:.	.:.:.:.:.:.:.	.:.:.:.:.:.:.	.:.:.:.:.:.:.	.:.:.:.:.:.:.	.:.:.:.:.:.:.	.:.:.:.:.:.:.
	6	3159499	T	C	synonymous variant|LOW	.:.:.:.:.:.:.	.:.:.:.:.:.:.	.:.:.:.:.:.:.	.:.:.:.:.:.:.	.:.:.:.:.:.:.	.:.:.:.:.:.:.	.:.:.:.:.:.:.	.:.:.:.:.:.:.	Present	Present	Present	Present	Present	Present	Present	.:.:.:.:.:.:.	.:.:.:.:.:.:.	.:.:.:.:.:.:.	Present	.:.:.:.:.:.:.	Present	.:.:.:.:.:.:.	.:.:.:.:.:.:.	.:.:.:.:.:.:.	.:.:.:.:.:.:.	.:.:.:.:.:.:.	.:.:.:.:.:.:.	.:.:.:.:.:.:.	.:.:.:.:.:.:.	.:.:.:.:.:.:.	.:.:.:.:.:.:.	.:.:.:.:.:.:.	.:.:.:.:.:.:.	.:.:.:.:.:.:.	.:.:.:.:.:.:.	.:.:.:.:.:.:.	.:.:.:.:.:.:.	.:.:.:.:.:.:.	.:.:.:.:.:.:.	.:.:.:.:.:.:.	.:.:.:.:.:.:.	.:.:.:.:.:.:.	.:.:.:.:.:.:.	.:.:.:.:.:.:.
	6	3159523	G	T	missense variant|MODERATE|Met -> Ile	.:.:.:.:.:.:.	.:.:.:.:.:.:.	.:.:.:.:.:.:.	.:.:.:.:.:.:.	.:.:.:.:.:.:.	.:.:.:.:.:.:.	.:.:.:.:.:.:.	.:.:.:.:.:.:.	.:.:.:.:.:.:.	.:.:.:.:.:.:.	.:.:.:.:.:.:.	.:.:.:.:.:.:.	.:.:.:.:.:.:.	.:.:.:.:.:.:.	.:.:.:.:.:.:.	.:.:.:.:.:.:.	.:.:.:.:.:.:.	.:.:.:.:.:.:.	.:.:.:.:.:.:.	.:.:.:.:.:.:.	.:.:.:.:.:.:.	.:.:.:.:.:.:.	.:.:.:.:.:.:.	.:.:.:.:.:.:.	.:.:.:.:.:.:.	.:.:.:.:.:.:.	.:.:.:.:.:.:.	.:.:.:.:.:.:.	.:.:.:.:.:.:.	.:.:.:.:.:.:.	.:.:.:.:.:.:.	.:.:.:.:.:.:.	.:.:.:.:.:.:.	.:.:.:.:.:.:.	.:.:.:.:.:.:.	.:.:.:.:.:.:.	.:.:.:.:.:.:.	.:.:.:.:.:.:.	.:.:.:.:.:.:.	.:.:.:.:.:.:.	.:.:.:.:.:.:.	.:.:.:.:.:.:.	.:.:.:.:.:.:.	.:.:.:.:.:.:.
	6	3159808	C	T	synonymous variant|LOW	.:.:.:.:.:.:.	.:.:.:.:.:.:.	.:.:.:.:.:.:.	.:.:.:.:.:.:.	.:.:.:.:.:.:.	.:.:.:.:.:.:.	.:.:.:.:.:.:.	.:.:.:.:.:.:.	Present	Present	Present	Present	Present	Present	Present	.:.:.:.:.:.:.	.:.:.:.:.:.:.	.:.:.:.:.:.:.	Present	.:.:.:.:.:.:.	Present	.:.:.:.:.:.:.	.:.:.:.:.:.:.	.:.:.:.:.:.:.	.:.:.:.:.:.:.	.:.:.:.:.:.:.	.:.:.:.:.:.:.	.:.:.:.:.:.:.	.:.:.:.:.:.:.	.:.:.:.:.:.:.	.:.:.:.:.:.:.	.:.:.:.:.:.:.	.:.:.:.:.:.:.	.:.:.:.:.:.:.	.:.:.:.:.:.:.	.:.:.:.:.:.:.	.:.:.:.:.:.:.	.:.:.:.:.:.:.	.:.:.:.:.:.:.	.:.:.:.:.:.:.	.:.:.:.:.:.:.	.:.:.:.:.:.:.	.:.:.:.:.:.:.	.:.:.:.:.:.:.
	6	3159853	G	A	synonymous variant|LOW	.:.:.:.:.:.:.	.:.:.:.:.:.:.	.:.:.:.:.:.:.	.:.:.:.:.:.:.	.:.:.:.:.:.:.	.:.:.:.:.:.:.	.:.:.:.:.:.:.	.:.:.:.:.:.:.	.:.:.:.:.:.:.	.:.:.:.:.:.:.	.:.:.:.:.:.:.	.:.:.:.:.:.:.	.:.:.:.:.:.:.	.:.:.:.:.:.:.	.:.:.:.:.:.:.	.:.:.:.:.:.:.	.:.:.:.:.:.:.	.:.:.:.:.:.:.	.:.:.:.:.:.:.	.:.:.:.:.:.:.	.:.:.:.:.:.:.	.:.:.:.:.:.:.	.:.:.:.:.:.:.	.:.:.:.:.:.:.	.:.:.:.:.:.:.	.:.:.:.:.:.:.	.:.:.:.:.:.:.	.:.:.:.:.:.:.	.:.:.:.:.:.:.	.:.:.:.:.:.:.	.:.:.:.:.:.:.	.:.:.:.:.:.:.	.:.:.:.:.:.:.	.:.:.:.:.:.:.	.:.:.:.:.:.:.	.:.:.:.:.:.:.	.:.:.:.:.:.:.	Present	.:.:.:.:.:.:.	.:.:.:.:.:.:.	.:.:.:.:.:.:.	.:.:.:.:.:.:.	.:.:.:.:.:.:.	.:.:.:.:.:.:.
	6	3160001	C	T	missense variant|MODERATE|Pro -> Ser	.:.:.:.:.:.:.	.:.:.:.:.:.:.	.:.:.:.:.:.:.	.:.:.:.:.:.:.	.:.:.:.:.:.:.	.:.:.:.:.:.:.	.:.:.:.:.:.:.	.:.:.:.:.:.:.	Present	Present	Present	Present	Present	Present	Present	.:.:.:.:.:.:.	.:.:.:.:.:.:.	.:.:.:.:.:.:.	Present	.:.:.:.:.:.:.	Present	.:.:.:.:.:.:.	.:.:.:.:.:.:.	.:.:.:.:.:.:.	.:.:.:.:.:.:.	.:.:.:.:.:.:.	.:.:.:.:.:.:.	.:.:.:.:.:.:.	.:.:.:.:.:.:.	.:.:.:.:.:.:.	.:.:.:.:.:.:.	.:.:.:.:.:.:.	.:.:.:.:.:.:.	.:.:.:.:.:.:.	.:.:.:.:.:.:.	.:.:.:.:.:.:.	.:.:.:.:.:.:.	.:.:.:.:.:.:.	.:.:.:.:.:.:.	.:.:.:.:.:.:.	.:.:.:.:.:.:.	.:.:.:.:.:.:.	.:.:.:.:.:.:.	.:.:.:.:.:.:.
	6	3160100	C	T	synonymous variant|LOW	.:.:.:.:.:.:.	.:.:.:.:.:.:.	.:.:.:.:.:.:.	.:.:.:.:.:.:.	.:.:.:.:.:.:.	.:.:.:.:.:.:.	.:.:.:.:.:.:.	.:.:.:.:.:.:.	.:.:.:.:.:.:.	.:.:.:.:.:.:.	.:.:.:.:.:.:.	.:.:.:.:.:.:.	.:.:.:.:.:.:.	.:.:.:.:.:.:.	.:.:.:.:.:.:.	.:.:.:.:.:.:.	.:.:.:.:.:.:.	.:.:.:.:.:.:.	.:.:.:.:.:.:.	.:.:.:.:.:.:.	.:.:.:.:.:.:.	.:.:.:.:.:.:.	.:.:.:.:.:.:.	.:.:.:.:.:.:.	.:.:.:.:.:.:.	Present	.:.:.:.:.:.:.	.:.:.:.:.:.:.	.:.:.:.:.:.:.	.:.:.:.:.:.:.	.:.:.:.:.:.:.	.:.:.:.:.:.:.	.:.:.:.:.:.:.	.:.:.:.:.:.:.	.:.:.:.:.:.:.	.:.:.:.:.:.:.	.:.:.:.:.:.:.	.:.:.:.:.:.:.	.:.:.:.:.:.:.	.:.:.:.:.:.:.	.:.:.:.:.:.:.	.:.:.:.:.:.:.	.:.:.:.:.:.:.	.:.:.:.:.:.:.
	6	3160406	A	C	synonymous variant|LOW	.:.:.:.:.:.:.	.:.:.:.:.:.:.	.:.:.:.:.:.:.	.:.:.:.:.:.:.	.:.:.:.:.:.:.	.:.:.:.:.:.:.	.:.:.:.:.:.:.	.:.:.:.:.:.:.	Present	Present	Present	Present	Present	Present	Present	.:.:.:.:.:.:.	.:.:.:.:.:.:.	.:.:.:.:.:.:.	Present	.:.:.:.:.:.:.	Present	.:.:.:.:.:.:.	.:.:.:.:.:.:.	.:.:.:.:.:.:.	.:.:.:.:.:.:.	.:.:.:.:.:.:.	.:.:.:.:.:.:.	.:.:.:.:.:.:.	.:.:.:.:.:.:.	.:.:.:.:.:.:.	.:.:.:.:.:.:.	.:.:.:.:.:.:.	.:.:.:.:.:.:.	.:.:.:.:.:.:.	.:.:.:.:.:.:.	.:.:.:.:.:.:.	.:.:.:.:.:.:.	.:.:.:.:.:.:.	.:.:.:.:.:.:.	.:.:.:.:.:.:.	.:.:.:.:.:.:.	.:.:.:.:.:.:.	.:.:.:.:.:.:.	.:.:.:.:.:.:.
	6	3160641	A	G	synonymous variant|LOW	.:.:.:.:.:.:.	.:.:.:.:.:.:.	.:.:.:.:.:.:.	.:.:.:.:.:.:.	.:.:.:.:.:.:.	.:.:.:.:.:.:.	.:.:.:.:.:.:.	.:.:.:.:.:.:.	.:.:.:.:.:.:.	.:.:.:.:.:.:.	.:.:.:.:.:.:.	.:.:.:.:.:.:.	.:.:.:.:.:.:.	.:.:.:.:.:.:.	.:.:.:.:.:.:.	.:.:.:.:.:.:.	.:.:.:.:.:.:.	.:.:.:.:.:.:.	.:.:.:.:.:.:.	.:.:.:.:.:.:.	.:.:.:.:.:.:.	.:.:.:.:.:.:.	.:.:.:.:.:.:.	.:.:.:.:.:.:.	.:.:.:.:.:.:.	.:.:.:.:.:.:.	.:.:.:.:.:.:.	.:.:.:.:.:.:.	.:.:.:.:.:.:.	.:.:.:.:.:.:.	.:.:.:.:.:.:.	.:.:.:.:.:.:.	.:.:.:.:.:.:.	.:.:.:.:.:.:.	.:.:.:.:.:.:.	Present	.:.:.:.:.:.:.	.:.:.:.:.:.:.	.:.:.:.:.:.:.	Present	.:.:.:.:.:.:.	.:.:.:.:.:.:.	.:.:.:.:.:.:.	.:.:.:.:.:.:.
	6	3160690	T	C	missense variant|MODERATE|Ser -> Pro	.:.:.:.:.:.:.	.:.:.:.:.:.:.	.:.:.:.:.:.:.	.:.:.:.:.:.:.	.:.:.:.:.:.:.	.:.:.:.:.:.:.	.:.:.:.:.:.:.	.:.:.:.:.:.:.	.:.:.:.:.:.:.	.:.:.:.:.:.:.	.:.:.:.:.:.:.	.:.:.:.:.:.:.	.:.:.:.:.:.:.	.:.:.:.:.:.:.	.:.:.:.:.:.:.	.:.:.:.:.:.:.	.:.:.:.:.:.:.	.:.:.:.:.:.:.	.:.:.:.:.:.:.	Present	.:.:.:.:.:.:.	.:.:.:.:.:.:.	.:.:.:.:.:.:.	.:.:.:.:.:.:.	.:.:.:.:.:.:.	.:.:.:.:.:.:.	.:.:.:.:.:.:.	.:.:.:.:.:.:.	.:.:.:.:.:.:.	.:.:.:.:.:.:.	.:.:.:.:.:.:.	.:.:.:.:.:.:.	.:.:.:.:.:.:.	Present	.:.:.:.:.:.:.	.:.:.:.:.:.:.	.:.:.:.:.:.:.	.:.:.:.:.:.:.	.:.:.:.:.:.:.	.:.:.:.:.:.:.	.:.:.:.:.:.:.	.:.:.:.:.:.:.	Present	.:.:.:.:.:.:.
mpkB	6	3232668	G	A	synonymous variant|LOW	.:.:.:.:.:.:.	.:.:.:.:.:.:.	.:.:.:.:.:.:.	.:.:.:.:.:.:.	.:.:.:.:.:.:.	.:.:.:.:.:.:.	.:.:.:.:.:.:.	.:.:.:.:.:.:.	.:.:.:.:.:.:.	.:.:.:.:.:.:.	.:.:.:.:.:.:.	.:.:.:.:.:.:.	.:.:.:.:.:.:.	.:.:.:.:.:.:.	.:.:.:.:.:.:.	Present	Present	.:.:.:.:.:.:.	.:.:.:.:.:.:.	.:.:.:.:.:.:.	.:.:.:.:.:.:.	.:.:.:.:.:.:.	.:.:.:.:.:.:.	.:.:.:.:.:.:.	.:.:.:.:.:.:.	.:.:.:.:.:.:.	.:.:.:.:.:.:.	.:.:.:.:.:.:.	.:.:.:.:.:.:.	.:.:.:.:.:.:.	.:.:.:.:.:.:.	.:.:.:.:.:.:.	.:.:.:.:.:.:.	.:.:.:.:.:.:.	.:.:.:.:.:.:.	.:.:.:.:.:.:.	.:.:.:.:.:.:.	.:.:.:.:.:.:.	.:.:.:.:.:.:.	.:.:.:.:.:.:.	.:.:.:.:.:.:.	.:.:.:.:.:.:.	.:.:.:.:.:.:.	.:.:.:.:.:.:.
	6	3232955	T	C	missense variant|MODERATE|Lys -> Arg	.:.:.:.:.:.:.	.:.:.:.:.:.:.	.:.:.:.:.:.:.	.:.:.:.:.:.:.	.:.:.:.:.:.:.	.:.:.:.:.:.:.	.:.:.:.:.:.:.	.:.:.:.:.:.:.	.:.:.:.:.:.:.	.:.:.:.:.:.:.	.:.:.:.:.:.:.	.:.:.:.:.:.:.	.:.:.:.:.:.:.	.:.:.:.:.:.:.	.:.:.:.:.:.:.	Present	Present	.:.:.:.:.:.:.	.:.:.:.:.:.:.	.:.:.:.:.:.:.	.:.:.:.:.:.:.	.:.:.:.:.:.:.	.:.:.:.:.:.:.	.:.:.:.:.:.:.	.:.:.:.:.:.:.	.:.:.:.:.:.:.	.:.:.:.:.:.:.	.:.:.:.:.:.:.	.:.:.:.:.:.:.	.:.:.:.:.:.:.	.:.:.:.:.:.:.	Present	.:.:.:.:.:.:.	.:.:.:.:.:.:.	.:.:.:.:.:.:.	.:.:.:.:.:.:.	.:.:.:.:.:.:.	.:.:.:.:.:.:.	.:.:.:.:.:.:.	.:.:.:.:.:.:.	.:.:.:.:.:.:.	.:.:.:.:.:.:.	Present	.:.:.:.:.:.:.
	6	3233118	A	G	Intron	Present	Present	Present	Present	Present	.:.:.:.:.:.:.	Present	Present	.:.:.:.:.:.:.	.:.:.:.:.:.:.	.:.:.:.:.:.:.	.:.:.:.:.:.:.	.:.:.:.:.:.:.	.:.:.:.:.:.:.	.:.:.:.:.:.:.	Present	Present	.:.:.:.:.:.:.	.:.:.:.:.:.:.	.:.:.:.:.:.:.	.:.:.:.:.:.:.	Present	Present	Present	Present	Present	Present	Present	Present	Present	.:.:.:.:.:.:.	Present	Present	.:.:.:.:.:.:.	Present	Present	Present	.:.:.:.:.:.:.	.:.:.:.:.:.:.	Present	Present	Present	Present	Present
	6	3233226	A	G	synonymous variant|LOW	.:.:.:.:.:.:.	.:.:.:.:.:.:.	.:.:.:.:.:.:.	.:.:.:.:.:.:.	.:.:.:.:.:.:.	.:.:.:.:.:.:.	.:.:.:.:.:.:.	.:.:.:.:.:.:.	Present	Present	Present	Present	Present	Present	Present	.:.:.:.:.:.:.	.:.:.:.:.:.:.	.:.:.:.:.:.:.	Present	.:.:.:.:.:.:.	Present	.:.:.:.:.:.:.	.:.:.:.:.:.:.	.:.:.:.:.:.:.	.:.:.:.:.:.:.	.:.:.:.:.:.:.	.:.:.:.:.:.:.	.:.:.:.:.:.:.	.:.:.:.:.:.:.	.:.:.:.:.:.:.	.:.:.:.:.:.:.	.:.:.:.:.:.:.	.:.:.:.:.:.:.	.:.:.:.:.:.:.	.:.:.:.:.:.:.	.:.:.:.:.:.:.	.:.:.:.:.:.:.	.:.:.:.:.:.:.	.:.:.:.:.:.:.	.:.:.:.:.:.:.	.:.:.:.:.:.:.	.:.:.:.:.:.:.	.:.:.:.:.:.:.	.:.:.:.:.:.:.
	6	3233262	A	G	synonymous variant|LOW	.:.:.:.:.:.:.	.:.:.:.:.:.:.	.:.:.:.:.:.:.	.:.:.:.:.:.:.	.:.:.:.:.:.:.	.:.:.:.:.:.:.	.:.:.:.:.:.:.	.:.:.:.:.:.:.	Present	Present	Present	Present	Present	Present	Present	.:.:.:.:.:.:.	.:.:.:.:.:.:.	Present	Present	.:.:.:.:.:.:.	Present	.:.:.:.:.:.:.	.:.:.:.:.:.:.	.:.:.:.:.:.:.	.:.:.:.:.:.:.	.:.:.:.:.:.:.	.:.:.:.:.:.:.	.:.:.:.:.:.:.	.:.:.:.:.:.:.	.:.:.:.:.:.:.	.:.:.:.:.:.:.	.:.:.:.:.:.:.	.:.:.:.:.:.:.	.:.:.:.:.:.:.	.:.:.:.:.:.:.	.:.:.:.:.:.:.	.:.:.:.:.:.:.	.:.:.:.:.:.:.	.:.:.:.:.:.:.	.:.:.:.:.:.:.	.:.:.:.:.:.:.	.:.:.:.:.:.:.	.:.:.:.:.:.:.	.:.:.:.:.:.:.
	6	3233290	A	C	missense variant|MODERATE|Met -> Arg	.:.:.:.:.:.:.	.:.:.:.:.:.:.	.:.:.:.:.:.:.	.:.:.:.:.:.:.	.:.:.:.:.:.:.	.:.:.:.:.:.:.	.:.:.:.:.:.:.	.:.:.:.:.:.:.	.:.:.:.:.:.:.	.:.:.:.:.:.:.	.:.:.:.:.:.:.	.:.:.:.:.:.:.	.:.:.:.:.:.:.	.:.:.:.:.:.:.	.:.:.:.:.:.:.	.:.:.:.:.:.:.	.:.:.:.:.:.:.	.:.:.:.:.:.:.	.:.:.:.:.:.:.	.:.:.:.:.:.:.	.:.:.:.:.:.:.	.:.:.:.:.:.:.	.:.:.:.:.:.:.	.:.:.:.:.:.:.	.:.:.:.:.:.:.	.:.:.:.:.:.:.	.:.:.:.:.:.:.	.:.:.:.:.:.:.	.:.:.:.:.:.:.	.:.:.:.:.:.:.	.:.:.:.:.:.:.	.:.:.:.:.:.:.	.:.:.:.:.:.:.	.:.:.:.:.:.:.	.:.:.:.:.:.:.	.:.:.:.:.:.:.	.:.:.:.:.:.:.	.:.:.:.:.:.:.	.:.:.:.:.:.:.	.:.:.:.:.:.:.	.:.:.:.:.:.:.	.:.:.:.:.:.:.	.:.:.:.:.:.:.	.:.:.:.:.:.:.
	6	3233378	G	A	synonymous variant|LOW	.:.:.:.:.:.:.	.:.:.:.:.:.:.	.:.:.:.:.:.:.	.:.:.:.:.:.:.	.:.:.:.:.:.:.	.:.:.:.:.:.:.	.:.:.:.:.:.:.	.:.:.:.:.:.:.	Present	Present	Present	Present	Present	Present	Present	.:.:.:.:.:.:.	.:.:.:.:.:.:.	Present	Present	.:.:.:.:.:.:.	Present	.:.:.:.:.:.:.	.:.:.:.:.:.:.	.:.:.:.:.:.:.	.:.:.:.:.:.:.	.:.:.:.:.:.:.	.:.:.:.:.:.:.	.:.:.:.:.:.:.	.:.:.:.:.:.:.	.:.:.:.:.:.:.	.:.:.:.:.:.:.	.:.:.:.:.:.:.	.:.:.:.:.:.:.	.:.:.:.:.:.:.	.:.:.:.:.:.:.	.:.:.:.:.:.:.	.:.:.:.:.:.:.	.:.:.:.:.:.:.	.:.:.:.:.:.:.	.:.:.:.:.:.:.	.:.:.:.:.:.:.	.:.:.:.:.:.:.	.:.:.:.:.:.:.	.:.:.:.:.:.:.
	6	3233385	G	A	synonymous variant|LOW	Present	Present	Present	Present	Present	.:.:.:.:.:.:.	Present	Present	.:.:.:.:.:.:.	.:.:.:.:.:.:.	.:.:.:.:.:.:.	.:.:.:.:.:.:.	.:.:.:.:.:.:.	.:.:.:.:.:.:.	.:.:.:.:.:.:.	Present	Present	.:.:.:.:.:.:.	.:.:.:.:.:.:.	.:.:.:.:.:.:.	.:.:.:.:.:.:.	Present	Present	Present	Present	Present	Present	Present	Present	Present	.:.:.:.:.:.:.	Present	Present	.:.:.:.:.:.:.	Present	Present	Present	Present	.:.:.:.:.:.:.	Present	Present	Present	Present	Present
	6	3233547	C	T	Intron	.:.:.:.:.:.:.	.:.:.:.:.:.:.	.:.:.:.:.:.:.	.:.:.:.:.:.:.	.:.:.:.:.:.:.	.:.:.:.:.:.:.	.:.:.:.:.:.:.	.:.:.:.:.:.:.	.:.:.:.:.:.:.	.:.:.:.:.:.:.	.:.:.:.:.:.:.	.:.:.:.:.:.:.	.:.:.:.:.:.:.	.:.:.:.:.:.:.	.:.:.:.:.:.:.	.:.:.:.:.:.:.	.:.:.:.:.:.:.	.:.:.:.:.:.:.	.:.:.:.:.:.:.	.:.:.:.:.:.:.	.:.:.:.:.:.:.	.:.:.:.:.:.:.	.:.:.:.:.:.:.	.:.:.:.:.:.:.	.:.:.:.:.:.:.	.:.:.:.:.:.:.	.:.:.:.:.:.:.	.:.:.:.:.:.:.	.:.:.:.:.:.:.	.:.:.:.:.:.:.	.:.:.:.:.:.:.	.:.:.:.:.:.:.	.:.:.:.:.:.:.	.:.:.:.:.:.:.	.:.:.:.:.:.:.	.:.:.:.:.:.:.	.:.:.:.:.:.:.	.:.:.:.:.:.:.	.:.:.:.:.:.:.	.:.:.:.:.:.:.	.:.:.:.:.:.:.	.:.:.:.:.:.:.	Present	.:.:.:.:.:.:.
	6	3233566	T	C	Intron	.:.:.:.:.:.:.	.:.:.:.:.:.:.	.:.:.:.:.:.:.	.:.:.:.:.:.:.	.:.:.:.:.:.:.	.:.:.:.:.:.:.	.:.:.:.:.:.:.	.:.:.:.:.:.:.	.:.:.:.:.:.:.	.:.:.:.:.:.:.	.:.:.:.:.:.:.	.:.:.:.:.:.:.	.:.:.:.:.:.:.	.:.:.:.:.:.:.	.:.:.:.:.:.:.	.:.:.:.:.:.:.	.:.:.:.:.:.:.	.:.:.:.:.:.:.	.:.:.:.:.:.:.	.:.:.:.:.:.:.	.:.:.:.:.:.:.	.:.:.:.:.:.:.	.:.:.:.:.:.:.	.:.:.:.:.:.:.	.:.:.:.:.:.:.	.:.:.:.:.:.:.	.:.:.:.:.:.:.	.:.:.:.:.:.:.	.:.:.:.:.:.:.	.:.:.:.:.:.:.	.:.:.:.:.:.:.	.:.:.:.:.:.:.	.:.:.:.:.:.:.	.:.:.:.:.:.:.	.:.:.:.:.:.:.	.:.:.:.:.:.:.	.:.:.:.:.:.:.	.:.:.:.:.:.:.	.:.:.:.:.:.:.	.:.:.:.:.:.:.	.:.:.:.:.:.:.	.:.:.:.:.:.:.	.:.:.:.:.:.:.	.:.:.:.:.:.:.
	6	3233591	G	A	splice region variant&intron variant|LOW	.:.:.:.:.:.:.	.:.:.:.:.:.:.	.:.:.:.:.:.:.	.:.:.:.:.:.:.	.:.:.:.:.:.:.	.:.:.:.:.:.:.	.:.:.:.:.:.:.	.:.:.:.:.:.:.	.:.:.:.:.:.:.	.:.:.:.:.:.:.	.:.:.:.:.:.:.	.:.:.:.:.:.:.	.:.:.:.:.:.:.	.:.:.:.:.:.:.	.:.:.:.:.:.:.	.:.:.:.:.:.:.	.:.:.:.:.:.:.	.:.:.:.:.:.:.	.:.:.:.:.:.:.	.:.:.:.:.:.:.	.:.:.:.:.:.:.	.:.:.:.:.:.:.	.:.:.:.:.:.:.	.:.:.:.:.:.:.	.:.:.:.:.:.:.	.:.:.:.:.:.:.	.:.:.:.:.:.:.	.:.:.:.:.:.:.	.:.:.:.:.:.:.	.:.:.:.:.:.:.	.:.:.:.:.:.:.	.:.:.:.:.:.:.	.:.:.:.:.:.:.	.:.:.:.:.:.:.	.:.:.:.:.:.:.	.:.:.:.:.:.:.	.:.:.:.:.:.:.	.:.:.:.:.:.:.	.:.:.:.:.:.:.	.:.:.:.:.:.:.	.:.:.:.:.:.:.	.:.:.:.:.:.:.	.:.:.:.:.:.:.	.:.:.:.:.:.:.
	6	3233859	A	G	synonymous variant|LOW	Present	Present	Present	Present	Present	Present	Present	Present	Present	Present	Present	Present	Present	Present	Present	Present	Present	Present	Present	Present	Present	Present	Present	Present	Present	Present	Present	Present	Present	Present	Present	Present	Present	Present	Present	Present	Present	Present	Present	Present	Present	Present	Present	Present
	6	3233883	T	A	missense variant|MODERATE|Gln -> His	.:.:.:.:.:.:.	.:.:.:.:.:.:.	.:.:.:.:.:.:.	.:.:.:.:.:.:.	.:.:.:.:.:.:.	.:.:.:.:.:.:.	.:.:.:.:.:.:.	.:.:.:.:.:.:.	.:.:.:.:.:.:.	.:.:.:.:.:.:.	.:.:.:.:.:.:.	.:.:.:.:.:.:.	.:.:.:.:.:.:.	.:.:.:.:.:.:.	.:.:.:.:.:.:.	.:.:.:.:.:.:.	.:.:.:.:.:.:.	.:.:.:.:.:.:.	.:.:.:.:.:.:.	.:.:.:.:.:.:.	.:.:.:.:.:.:.	.:.:.:.:.:.:.	.:.:.:.:.:.:.	.:.:.:.:.:.:.	.:.:.:.:.:.:.	.:.:.:.:.:.:.	.:.:.:.:.:.:.	.:.:.:.:.:.:.	.:.:.:.:.:.:.	.:.:.:.:.:.:.	.:.:.:.:.:.:.	.:.:.:.:.:.:.	.:.:.:.:.:.:.	.:.:.:.:.:.:.	.:.:.:.:.:.:.	.:.:.:.:.:.:.	.:.:.:.:.:.:.	.:.:.:.:.:.:.	.:.:.:.:.:.:.	.:.:.:.:.:.:.	.:.:.:.:.:.:.	.:.:.:.:.:.:.	.:.:.:.:.:.:.	.:.:.:.:.:.:.
[truncated: 27 more columns]

## Sheet: Table S3
Missense mutations are highlighted in red.
Chromosome	SNP ID	Position (bp)	P-value	−log10(P-value)	Product
6	304875	1168808	1.05e-05	4.97881	cytokinesis protein SepA/Bni1
3	139709	897091	0.0001207	3.91829	nonribosomal peptide synthetase SidE
6	345832	3778103	0.0007242	3.14014	telomere-associated RecQ helicase putative
6	325236	2407095	0.000763	3.11748	LysM domain protein putative
6	300337	693582	0.0007702	3.1134	aspartic endopeptidase (AP1) putative
2	118709	4698669	0.0007806	3.10757	sulfatase domain protein
6	345743	3777663	0.001213	2.91614	telomere-associated RecQ helicase putative
3	156962	1418334	0.001324	2.87811	serum paraoxonase/arylesterase family protein
6	335101	2995162	0.0015	2.82391	exo-beta-1 3-glucanase putative
6	310268	1447761	0.001533	2.81446	beta-galactosidase putative
6	318436	2233663	0.002551	2.59329	SRF-type transcription factor family protein
7	366659	1700132	0.002551	2.59329	oxidoreductase putative
5	254340	1011218	0.003013	2.521	class III chitinase ChiA1
8	382872	413868	0.003131	2.50432	hypothetical protein
7	366900	1706864	0.003231	2.49066	conserved hypothetical protein
2	115951	4450713	0.003293	2.48241	conserved hypothetical protein
4	200222	860917	0.0034	2.46852	DEAD/DEAH box helicase putative
6	312155	1637184	0.003561	2.44843	ABC transporter (Adp1) putative
8	385385	579788	0.003721	2.42934	serine-leucine-rich repeat protein
2	78252	1608790	0.004077	2.38966	conserved hypothetical protein
2	88185	1993880	0.004664	2.33124	acyl-CoA synthetase putative
3	139393	874830	0.004664	2.33124	isochorismatase family hydrolase putative
3	156379	1342153	0.004664	2.33124	cell cycle protein kinase putative
4	218812	2429542	0.004664	2.33124	ankyrin repeat protein
6	316111	2057378	0.004664	2.33124	phosphotyrosyl phosphatase activator
7	364278	1632265	0.004664	2.33124	Rieske [2Fe-2S] domain protein
5	280074	3732268	0.004873	2.3122	conserved hypothetical protein
4	231004	3683551	0.004995	2.30146	UDP-glucose 4-epimerase
5	242880	82197	0.005079	2.29422	C6 transcription factor putative
5	242974	86439	0.005079	2.29422	zinc-binding oxidoreductase putative
5	244030	118736	0.005079	2.29422	MFS transporter putative
8	382385	390156	0.005218	2.2825	pectin methylesterase putative
6	335602	3016862	0.005316	2.27442	Non-ribosomal peptide synthase putative
2	75044	1267543	0.005456	2.26313	PAB-dependent poly(A)-specific ribonuclease subunit Pan2 putative
2	75930	1360489	0.005456	2.26313	conserved hypothetical protein
3	175734	3078116	0.005456	2.26313	conserved hypothetical protein
4	217486	2313365	0.005456	2.26313	protein kinase putative
5	275554	3285594	0.005456	2.26313	phosphatidylinositol kinase Tel1 putative
6	296008	262515	0.00578	2.23807	MFS lactose permease putative
7	361876	1455501	0.005871	2.23129	hypothetical protein
2	62155	31008	0.006035	2.21932	glutathione-dependent formaldehyde dehydrogenase
3	156939	1415277	0.00617	2.20971	GATA transcription factor LreA
3	169704	2448404	0.006359	2.19661	asparaginyl-tRNA synthetase Slm5 putative
1	50776	4492819	0.006368	2.196	conserved hypothetical protein
1	1621	56172	0.006388	2.19464	hypothetical protein
6	323522	2369490	0.006535	2.18475	cytochrome P450 oxidoreductase GliF
7	366962	1708410	0.006897	2.16134	GDP-D-mannose dehydratase putative
8	382426	392082	0.006926	2.15952	pectin methylesterase putative
2	100306	3215657	0.007162	2.14497	conserved hypothetical protein
1	31612	2608709	0.007194	2.14303	UPF0261 domain protein
2	89472	2120813	0.008091	2.092	conserved hypothetical protein
3	173276	2830607	0.008262	2.08291	hypothetical protein
8	382382	389948	0.008267	2.08265	pectin methylesterase putative
5	245193	168562	0.008661	2.06243	hypothetical protein
4	200901	923556	0.008922	2.04954	epoxide hydrolase putative
6	296096	271386	0.009049	2.0434	C2H2 finger domain protein putative
6	328093	2504285	0.009056	2.04306	N O-diacetyl muramidase putative
4	196557	329673	0.009155	2.03834	hypothetical protein
8	382679	403962	0.009155	2.03834	ADP-ribosylglycohydrolase family protein
1	10901	494306	0.009369	2.02831	C6 finger domain protein putative
5	247522	303335	0.009381	2.02775	amine oxidase flavin-containing superfamily
3	174255	2937870	0.009418	2.02604	conserved hypothetical protein
5	247198	279700	0.009462	2.02402	UPF0075 domain protein
1	16174	1023701	0.009626	2.01655	dual specificity phosphatase catalytic domain protein
1	16279	1036531	0.009626	2.01655	importin 11 putative
